# Supplementary material
Source: PubMed Central journal article supplement (PMC3209502)
Supplement: NIHMS328840-supplement-01.pdf [file NIHMS328840-supplement-01.pdf]

**University of North Carolina**  
**At Chapel Hill**  
**National Institute of Mental Health**  
**Psychoactive Drug Screening Program**

# **Assay Protocol Book**

What follows is a detailed description of the experimental protocols followed for measurements of compound affinity ( $K_i$ ), agonist/antagonist potency ( $EC_{50}/IC_{50}$ ), and agonist relative efficacy at recombinant, heterologously expressed or endogenous targets.

| <b>Table of Contents</b>                                                                                                                                                                                                                                                                                                                                                                                                                                                                                                                                                                                                                                                                                            |            |
|---------------------------------------------------------------------------------------------------------------------------------------------------------------------------------------------------------------------------------------------------------------------------------------------------------------------------------------------------------------------------------------------------------------------------------------------------------------------------------------------------------------------------------------------------------------------------------------------------------------------------------------------------------------------------------------------------------------------|------------|
| <b>I. Primary Radioligand Binding Assays</b>                                                                                                                                                                                                                                                                                                                                                                                                                                                                                                                                                                                                                                                                        | <b>3</b>   |
| <b>II. Secondary Radioligand Binding Assays</b>                                                                                                                                                                                                                                                                                                                                                                                                                                                                                                                                                                                                                                                                     |            |
| a. <u>Serotonin Receptors</u> : 5-HT <sub>1A</sub> , 5-HT <sub>1B</sub> , 5-HT <sub>1D</sub> , 5-HT <sub>1E</sub> , 5-HT <sub>2A</sub> , 5-HT <sub>2B</sub> , 5-HT <sub>2C</sub> , 5-HT <sub>3</sub> , 5-HT <sub>5A</sub> , 5-HT <sub>6</sub> and 5-HT <sub>7</sub>                                                                                                                                                                                                                                                                                                                                                                                                                                                 | 9          |
| b. <u>Dopamine Receptors</u> : D <sub>1</sub> , D <sub>2</sub> , D <sub>3</sub> , D <sub>4</sub> , D <sub>5</sub>                                                                                                                                                                                                                                                                                                                                                                                                                                                                                                                                                                                                   | 18         |
| c. <u>Glutamate Receptors</u> : NMDA Receptor (MK801 site), mGluR <sub>5</sub>                                                                                                                                                                                                                                                                                                                                                                                                                                                                                                                                                                                                                                      | 23         |
| d. <u>GABA Receptors</u> : GABA <sub>A</sub> (rat brain muscimol site), PBR (rat kidney PK11195 site), recombinant $\alpha 1\beta 2\gamma 2$ , $\alpha 2\beta 2\gamma 2$ , $\alpha 3\beta 2\gamma 2$ , $\alpha 5\beta 2\gamma 2$                                                                                                                                                                                                                                                                                                                                                                                                                                                                                    | 29         |
| e. <u>Biogenic Amine Transporters</u> : SERT, NET, DAT                                                                                                                                                                                                                                                                                                                                                                                                                                                                                                                                                                                                                                                              | 35         |
| f. <u>Adrenergic Receptors</u> : $\alpha_{1A}$ , $\alpha_{1B}$ , $\alpha_{2A}$ , $\alpha_{2B}$ , $\alpha_{2C}$ , $\beta_1$ , $\beta_2$ , $\beta_3$                                                                                                                                                                                                                                                                                                                                                                                                                                                                                                                                                                  | 39         |
| g. <u>Muscarinic Receptors</u> : M <sub>1</sub> , M <sub>2</sub> , M <sub>3</sub> , M <sub>4</sub> , M <sub>5</sub>                                                                                                                                                                                                                                                                                                                                                                                                                                                                                                                                                                                                 | 45         |
| h. <u>Nicotinic Receptors</u> : $\alpha 2\beta 2$ , $\alpha 2\beta 4$ , $\alpha 3\beta 2$ , $\alpha 3\beta 4$ , $\alpha 4\beta 2$ , $\alpha 4\beta 4$ , enodegnous (rat forebrain) $\alpha 4\beta 2$                                                                                                                                                                                                                                                                                                                                                                                                                                                                                                                | 50         |
| i. <u>Opioid Receptors</u> : MOR, KOR, DOR                                                                                                                                                                                                                                                                                                                                                                                                                                                                                                                                                                                                                                                                          | 55         |
| j. <u>Sigma Receptors</u> : Sigma1, Sigma2                                                                                                                                                                                                                                                                                                                                                                                                                                                                                                                                                                                                                                                                          | 59         |
| k. <u>Histamine Receptors</u> : H <sub>1</sub> , H <sub>2</sub> , H <sub>3</sub> , H <sub>4</sub>                                                                                                                                                                                                                                                                                                                                                                                                                                                                                                                                                                                                                   | 62         |
| l. <u>Vasopressin Receptors</u> : V <sub>1</sub> , V <sub>2</sub> , V <sub>3</sub>                                                                                                                                                                                                                                                                                                                                                                                                                                                                                                                                                                                                                                  | 66         |
| m. <u>Neurotensin Receptors</u> : NT1, NT2                                                                                                                                                                                                                                                                                                                                                                                                                                                                                                                                                                                                                                                                          | 70         |
| n. <u>Vesicular Monoamine Transporter</u> : VMAT2                                                                                                                                                                                                                                                                                                                                                                                                                                                                                                                                                                                                                                                                   | 73         |
| <b>III. Functional Assays</b>                                                                                                                                                                                                                                                                                                                                                                                                                                                                                                                                                                                                                                                                                       |            |
| a. Gi/o-Coupled Targets: [ <sup>35</sup> S]GTP $\gamma$ S binding to crude membrane fractions ( <u>Serotonin Receptors</u> : 5-HT <sub>1A</sub> , 5-HT <sub>1B</sub> , 5-HT <sub>1D</sub> , 5-HT <sub>1E</sub> , 5-HT <sub>5A</sub> ; <u>Dopamine Receptors</u> : D <sub>2</sub> , D <sub>4</sub> ; <u>Norepinephrine Receptors</u> : $\alpha_{2A}$ , $\alpha_{2B}$ , $\alpha_{2C}$ ; <u>Muscarinic Receptors</u> : M <sub>2</sub> , M <sub>4</sub> ; <u>Opioid Receptors</u> : MOR, KOR, DOR; <u>Histamine Receptors</u> : H <sub>3</sub> , H <sub>4</sub> )                                                                                                                                                       | 76         |
| b. Gq/11-Coupled Targets: intracellular calcium mobilization ( <u>Serotonin Receptors</u> : 5-HT <sub>2A</sub> , 5-HT <sub>2B</sub> , 5-HT <sub>2C</sub> ; <u>Glutamate Receptors</u> : mGluR <sub>5</sub> ; <u>Norepinephrine Receptors</u> : $\alpha_{1A}$ , $\alpha_{1B}$ , $\alpha_{1D}$ ; <u>Muscarinic Receptors</u> : M <sub>1</sub> , M <sub>3</sub> , M <sub>5</sub> ; <u>Histamine Receptors</u> : H <sub>1</sub> , H <sub>2</sub> ; <u>Purinergic Receptors</u> : P2Y1, P2Y2, P2Y4, P2Y6; <u>Oxytocin Receptor</u> ; <u>Vasopressin Receptors</u> : V <sub>1</sub> , V <sub>2</sub> , V <sub>3</sub> ; <u>Free Fatty Acid Receptors</u> : GPR40, GPR41, GPR43; <u>Melanocortin Receptors</u> : MC3, MC4) | 84         |
| c. Gq/G11/i9-Coupled Targets: intracellular inositol phosphate accumulation ( <u>Glutamate Receptors</u> : mGluR <sub>1</sub> , mGluR <sub>5</sub> , mGluR <sub>6</sub> )                                                                                                                                                                                                                                                                                                                                                                                                                                                                                                                                           | 102        |
| d. Gi-Coupled Targets: inhibition of forskolin-stimulated intracellular cAMP accumulation ( <u>Glutamate Receptors</u> : mGluR <sub>2</sub> , mGluR <sub>4</sub> , mGluR <sub>8</sub> )                                                                                                                                                                                                                                                                                                                                                                                                                                                                                                                             | 105        |
| e. Gs-Coupled Targets: intracellular cAMP accumulation ( <u>Serotonin Receptors</u> : 5-HT <sub>6</sub> , 5-HT <sub>7</sub> ; <u>Dopamine Receptors</u> : D <sub>1</sub> , D <sub>5</sub> ; <u>Norepinephrine Receptors</u> : $\beta_1$ , $\beta_2$ , $\beta_3$ )                                                                                                                                                                                                                                                                                                                                                                                                                                                   | 108        |
| f. Monoamine Transporter Targets: inhibition of [ <sup>3</sup> H]monoamine uptake ( <u>Serotonin Transporter</u> ; <u>Dopamine Transporter</u> ; <u>Norepinephrine Transporter</u> )                                                                                                                                                                                                                                                                                                                                                                                                                                                                                                                                | 112        |
| g. Histone Deacetylase (HDAC) Inhibition Assay                                                                                                                                                                                                                                                                                                                                                                                                                                                                                                                                                                                                                                                                      | 115        |
| h. HERG K <sup>+</sup> Channel Modulation Assay                                                                                                                                                                                                                                                                                                                                                                                                                                                                                                                                                                                                                                                                     | 117        |
| i. <sup>86</sup> Rb <sup>+</sup> Efflux Assay (Nicotinic Receptors: $\alpha 3\beta 4$ )                                                                                                                                                                                                                                                                                                                                                                                                                                                                                                                                                                                                                             | 119        |
| j. MDR-1 Modulation Assay                                                                                                                                                                                                                                                                                                                                                                                                                                                                                                                                                                                                                                                                                           | 122        |
| <b>IV. Membrane Fraction Preparation</b>                                                                                                                                                                                                                                                                                                                                                                                                                                                                                                                                                                                                                                                                            |            |
| a. Transiently- or stably-transfected cell lines                                                                                                                                                                                                                                                                                                                                                                                                                                                                                                                                                                                                                                                                    | 125        |
| b. Rodent brain                                                                                                                                                                                                                                                                                                                                                                                                                                                                                                                                                                                                                                                                                                     | 125        |
| <b>V. Complete List of Research Publications Co-authored or Otherwise Supported by the NIMH PDSP</b>                                                                                                                                                                                                                                                                                                                                                                                                                                                                                                                                                                                                                | <b>126</b> |

## I. Primary Radioligand Binding Assays

Compounds submitted to the PDSP are typically subjected to a 'primary assay' designed to identify a subset of potential receptors, transporters, ion channels, etc. for which the compounds display affinity.

### Experimental Procedure and Data Analysis:

Test and reference compounds (see Table 1) are diluted to 5X final assay concentration (50  $\mu$ M for a final assay concentration of 10  $\mu$ M) in the appropriate radioligand binding buffer (see Table 1). Then, 50- $\mu$ l aliquots of buffer (negative control), test compound, and reference compound are added in quadruplicate to the wells of a 96-well plate, each of which contains 50  $\mu$ l of 5X radioligand (see Table 1 for final assay concentration for each radioligand) and 100  $\mu$ l of buffer (see Table 1). Finally, receptor-containing, crude membrane fractions (prepared as detailed in IV) are resuspended in an appropriate volume of buffer (see Table 1) and dispensed (50  $\mu$ l per well) into 96-well plate. Radioligand binding is allowed to equilibrate (typically for 1.5 hours at room temperature, see Table 1), and then bound radioactivity is isolated by filtration onto 0.3% polyethyleneimine-treated, 96-well filter mats using a 96-well Filtermate harvester. The filter mats are dried, then scintillant is melted onto the filters and the radioactivity retained on the filters is counted in a Microbeta scintillation counter.

Raw dpm data from the Microbeta counter are analyzed on the PDSP DB. Total bound radioactivity is estimated from quadruplicate wells containing no test or reference compound and adjusted to 100%; non-specifically bound radioactivity is assessed from quadruplicate wells containing 10  $\mu$ M of a suitable reference compound (see Table 1) and adjusted to 0%. The average bound radioactivity in the presence of the test compound (10  $\mu$ M final assay concentration, quadruplicate determinations) is then expressed on the percent scale. The percent inhibition of radioligand binding is calculated as follows:

$$\% \text{ inhibition} = 100\% - \% \text{ radioactivity bound}$$

The PDSP on-line data entry and analysis system calculates the variance of the quadruplicate determinations (for the total, non-specific, and test compound binding values) and variances greater than 20% are flagged for further inspection and assays are repeated if necessary. Additionally, % inhibition values that are greater than the total binding (i.e., 100%) by at least 20% are also flagged for inspection; such results could indicate allosteric modulation of radioligand binding.

| Receptor | Radioligand (Assay Conc.)                   | Reference        | Assay Buffer             |
|----------|---------------------------------------------|------------------|--------------------------|
| 5-HT1A   | [ <sup>3</sup> H]8-OH-DPAT (0.5 nM)         | Methysergide     | Standard Binding Buffer  |
| 5-HT1B   | [ <sup>3</sup> H]GR127543 (0.3 nM)          | Ergotamine       | Standard Binding Buffer  |
| 5-HT1D   | [ <sup>3</sup> H]GR127543 (0.3 nM)          | Ergotamine       | Standard Binding Buffer  |
| 5-HT1E   | [ <sup>3</sup> H]5-HT (3 nM)                | 5-HT             | Standard Binding Buffer  |
| 5-HT2A   | [ <sup>3</sup> H]Ketanserin (0.5 nM)        | Chlorpromazine   | Standard Binding Buffer  |
| 5-HT2B   | [ <sup>3</sup> H]LSD (1 nM)                 | Methysergide     | Standard Binding Buffer  |
| 5-HT2C   | [ <sup>3</sup> H]Mesulergine (0.5 nM)       | Chlorpromazine   | Standard Binding Buffer  |
| 5-HT3    | [ <sup>3</sup> H]LY278584 (0.3 nM)          | LY278584         | Standard Binding Buffer  |
| 5-HT5a   | [ <sup>3</sup> H]LSD (1 nM)                 | Ergotamine       | Standard Binding Buffer  |
| 5-HT6    | [ <sup>3</sup> H]LSD (1 nM)                 | Chlorpromazine   | Standard Binding Buffer  |
| 5-HT7    | [ <sup>3</sup> H]LSD (1 nM)                 | Chlorpromazine   | Standard Binding Buffer  |
| D1       | [ <sup>3</sup> H]SCH233930 (0.2 nM)         | SKF38393         | Dopamine Binding Buffer  |
| D2       | [ <sup>3</sup> H]N-methylspiperone (0.2 nM) | Haloperidol      | Dopamine Binding Buffer  |
| D3       | [ <sup>3</sup> H]N-methylspiperone (0.2 nM) | Chlorpromazine   | Dopamine Binding Buffer  |
| D4       | [ <sup>3</sup> H]N-methylspiperone (0.3 nM) | Chlorpromazine   | Dopamine Binding Buffer  |
| D5       | [ <sup>3</sup> H]SCH233930 (0.2 nM)         | SKF38393         | Dopamine Binding Buffer  |
| Delta OR | [ <sup>3</sup> H]DADLE (0.3 nM)             | Naltrindole      | Standard Binding Buffer  |
| Kappa OR | [ <sup>3</sup> H]U69593 (0.3 nM)            | Salvinorin A     | Standard Binding Buffer  |
| Mu OR    | [ <sup>3</sup> H]DAMGO (0.3 nM)             | DAMGO            | Standard Binding Buffer  |
| H1       | [ <sup>3</sup> H]Pyrilamine (0.9 nM)        | Chlorpheniramine | Histamine Binding Buffer |
| H2       | [ <sup>3</sup> H]Tiotidine (3 nM)           | Cimetidine       | Histamine Binding Buffer |

|            |                                                 |               |                                                   |
|------------|-------------------------------------------------|---------------|---------------------------------------------------|
| H3         | [ <sup>3</sup> H]alpha-methylhistamine (0.4 nM) | Histamine     | Histamine Binding Buffer                          |
| H4         | [ <sup>3</sup> H]Histamine (5 nM)               | Clozapine     | Histamine Binding Buffer                          |
| SERT       | [ <sup>3</sup> H]Citalopram (0.5 nM)            | Amitriptyline | Transporter Binding Buffer                        |
| NET        | [ <sup>3</sup> H]Nisoxetine (0.5 nM)            | Desipramine   | Transporter Binding Buffer                        |
| DAT        | [ <sup>3</sup> H]WIN35428 (0.5 nM)              | GBR12909      | Transporter Binding Buffer                        |
| V1         | [ <sup>3</sup> H]Vasopressin (1 nM)             | Vasopressin   | Vasopressin Binding Buffer                        |
| V2         | [ <sup>3</sup> H]Vasopressin (1 nM)             | Vasopressin   | Vasopressin Binding Buffer                        |
| V3         | [ <sup>3</sup> H]Vasopressin (1 nM)             | Vasopressin   | Vasopressin Binding Buffer                        |
| EP3        | [ <sup>3</sup> H]PGE2 (10 nM)                   | EP2           | Prostaglandin Binding Buffer                      |
| EP4        | [ <sup>3</sup> H]PGE2 (10 nM)                   | EP2           | Prostaglandin Binding Buffer                      |
| PKCalpha   | [ <sup>3</sup> H]PDBU (3 nM)                    | PDBU          | PKC Binding Buffer                                |
| PKCbeta    | [ <sup>3</sup> H]PDBU (3 nM)                    | PDBU          | PKC Binding Buffer                                |
| PKCgamma   | [ <sup>3</sup> H]PDBU (3 nM)                    | PDBU          | PKC Binding Buffer                                |
| PKCdelta   | [ <sup>3</sup> H]PDBU (3 nM)                    | PDBU          | PKC Binding Buffer                                |
| PKCepsilon | [ <sup>3</sup> H]PDBU (3 nM)                    | PDBU          | PKC Binding Buffer                                |
| A1         | [ <sup>3</sup> H]NECA (5 nM)                    | NECA          | Adenosine Binding Buffer                          |
| A2         | [ <sup>3</sup> H]NECA (10 nM)                   | NECA          | Adenosine Binding Buffer                          |
| VMAT2      | [ <sup>3</sup> H]Tetrabenzazine (1.5 nM)        | Reserpine     | VMAT Binding Buffer                               |
| GABAA      | [ <sup>3</sup> H]Muscimol (1 nM)                | GABA          | 50 mM Tris Acetate, pH 7.4                        |
| GABAB      | [ <sup>3</sup> H]Baclofen (20 nM)               | GABA          | 50 mM Tris Acetate, pH 7.4                        |
| PBR        | [ <sup>3</sup> H]PK11195 (1 nM)                 | PK11195       | 50 mM Tris HCl, pH 7.4                            |
| AMPA       | [ <sup>3</sup> H]AMPA (1 nM)                    | Glutamic Acid | 50 mM Tris HCl, 2.5 mM CaCl <sub>2</sub> , pH 7.4 |

|                     |                                          |               |                                                   |
|---------------------|------------------------------------------|---------------|---------------------------------------------------|
| <b>BZP</b>          | [ <sup>3</sup> H]Flunitrazepam (0.5 nM)  | Diazepam      | 50 mM Tris HCl, 2.5 mM CaCl <sub>2</sub> , pH 7.4 |
| <b>Kainate</b>      | [ <sup>3</sup> H]Kainic Acid             | Glutamic Acid | 50 mM Tris HCl, 2.5 mM CaCl <sub>2</sub> , pH 7.4 |
| <b>Na Channel</b>   | [ <sup>3</sup> H]Batrachotoxin           | Veratridine   | Na Channel Buffer                                 |
| <b>NMDA</b>         | [ <sup>3</sup> H]MK801 (1 nM)            | MK801         | 5 mM Tris, pH 7.4                                 |
| <b>Oxytocin</b>     | [ <sup>3</sup> H]Oxytocin                | Oxytocin      | Oxytocin Binding Buffer                           |
| <b>Alpha1A</b>      | [ <sup>3</sup> H]Prazosin (0.7 nM)       | Urapidil      | Alpha1 Binding Buffer                             |
| <b>Alpha1B</b>      | [ <sup>3</sup> H]Prazosin (0.7 nM)       | Corynanthine  | Alpha1 Binding Buffer                             |
| <b>Alpha2A</b>      | [ <sup>3</sup> H]Clonidine (1 nM)        | Oxymetazoline | Alpha2 Binding Buffer                             |
| <b>Alpha2B</b>      | [ <sup>3</sup> H]Clonidine (1 nM)        | Prazosin      | Alpha2 Binding Buffer                             |
| <b>Alpha2C</b>      | [ <sup>3</sup> H]Clonidine (1 nM)        | Prazosin      | Alpha2 Binding Buffer                             |
| <b>Beta1</b>        | [ <sup>125</sup> I]Iodopindolol (0.1 nM) | Atenolol      | Beta Binding Buffer                               |
| <b>Beta2</b>        | [ <sup>125</sup> I]Iodopindolol (0.1 nM) | ICI118551     | Beta Binding Buffer                               |
| <b>Beta3</b>        | [ <sup>125</sup> I]Iodopindolol (0.1 nM) | ICI118551     | Beta Binding Buffer                               |
| <b>M1</b>           | [ <sup>3</sup> H]QNB (0.5 nM)            | Atropine      | Muscarinic Binding Buffer                         |
| <b>M2</b>           | [ <sup>3</sup> H]QNB (0.5 nM)            | Atropine      | Muscarinic Binding Buffer                         |
| <b>M3</b>           | [ <sup>3</sup> H]QNB (0.5 nM)            | Atropine      | Muscarinic Binding Buffer                         |
| <b>M4</b>           | [ <sup>3</sup> H]QNB (0.5 nM)            | Atropine      | Muscarinic Binding Buffer                         |
| <b>M5</b>           | [ <sup>3</sup> H]QNB (0.5 nM)            | Atropine      | Muscarinic Binding Buffer                         |
| <b>Alpha2Beta 2</b> | [ <sup>3</sup> H]Epibatidine (0.5 nM)    | (-)-Nicotine  | 50 mM Tris HCl, pH 7.4                            |
| <b>Alpha2Beta 4</b> | [ <sup>3</sup> H]Epibatidine (0.5 nM)    | (-)-Nicotine  | 50 mM Tris HCl, pH 7.4                            |
| <b>Alpha3Beta 2</b> | [ <sup>3</sup> H]Epibatidine (0.5 nM)    | (-)-Nicotine  | 50 mM Tris HCl, pH 7.4                            |
| <b>Alpha3Beta</b>   | [ <sup>3</sup> H]Epibatidine (0.5 nM)    | (-)-Nicotine  | 50 mM Tris HCl,                                   |

|                      |                                        |              |                                  |
|----------------------|----------------------------------------|--------------|----------------------------------|
| 4                    |                                        |              | pH 7.4                           |
| Alpha4Beta2          | [ <sup>3</sup> H]Epibatidine (0.5 nM)  | (-)-Nicotine | 50 mM Tris HCl, pH 7.4           |
| Alpha4Beta4          | [ <sup>3</sup> H]Epibatidine (0.5 nM)  | (-)-Nicotine | 50 mM Tris HCl, pH 7.4           |
| Alpha4Beta2 (endog.) | [ <sup>3</sup> H]Epibatidine (0.5 nM)  | (-)-Nicotine | 50 mM Tris HCl, pH 7.4           |
| CB1                  | [ <sup>3</sup> H]CP55940               | CP55940      | Cannabinoid Binding Buffer       |
| CB2                  | [ <sup>3</sup> H]CP55940               | CP55940      | Cannabinoid Binding Buffer       |
| Sigma1               | [ <sup>3</sup> H]Pentazocine (3 nM)    | Haloperidol  | Sigma Binding Buffer             |
| Sigma2               | [ <sup>3</sup> H]DTG (3 nM)            | Haloperidol  | Sigma Binding Buffer             |
| AT1                  | [ <sup>125</sup> I]ATII (0.1 nM)       | Candesartan  | Angiotensin Binding Buffer       |
| AT2                  | [ <sup>125</sup> I]ATII (0.1 nM)       | PD123319     | Angiotensin Binding Buffer       |
| Ca++ Channel         | [ <sup>3</sup> H]Nitrendipine (0.1 nM) | Nifedipine   | Calcium Channel Buffer           |
| Imidazoline 1        | [ <sup>125</sup> I]Clonidine (0.1 nM)  | Naphazoline  | Imidazoline Binding Buffer       |
| NT1                  | [ <sup>3</sup> H]Neurotensin (2 nM)    | Neurotensin  | 50 mM Tris HCl, 0.2% BSA, pH 7.4 |
| NT2                  | [ <sup>3</sup> H]Neurotensin (2 nM)    | Neurotensin  | 50 mM Tris HCl, 0.2% BSA, pH 7.4 |

**Table 1. Assay conditions for primary radioligand binding assays.**

**Buffer Compositions:**

Standard Binding Buffer: 50 mM Tris HCl, 10 mM MgCl<sub>2</sub>, 0.1 mM EDTA, pH 7.4

Dopamine Binding Buffer: 50 mM HEPES, 50 mM NaCl, 5 mM MgCl<sub>2</sub>, 0.5 mM EDTA, pH 7.4

Histamine Binding Buffer: 50 mM Tris HCl, 0.5 mM EDTA, pH 7.4

Transporter Binding Buffer: 50 mM Tris HCl, 150 mM NaCl, 5 mM KCl, pH 7.4

Vasopressin Binding Buffer: 20 mM Tris HCl, 100 mM NaCl, 10 mM MgCl<sub>2</sub>, 0.1 mg/ml bacitracin, 1 mg/ml BSA, pH 7.4

Prostaglandin Binding Buffer: 25 mM Tris HCl, 10 mM MgCl<sub>2</sub>, 1 mM EDTA, pH 7.4

PKC Binding Buffer: 50 mM Tris HCl, 1 mM CaCl<sub>2</sub>, 4 mg/ml BSA, 100 µg/ml phosphatidylserine, pH 7.4

Adenosine Binding Buffer: 50 mM Tris HCl, 1 U/ml adenosine deaminase, pH 7.4

VMAT Binding Buffer: 50 mM HEPES, 300 mM sucrose, pH 8.0

Na Channel Buffer: 130 mM choline chloride, 5.4 mM KCl, 0.8 MgSO<sub>4</sub>, 5.5 mM glucose, 50 mM HEPES, 1 μM tetrodotoxin, 1 mg/ml BSA, 30 μg/well scorpion venom, pH 7.4 at 37 degrees centigrade

Oxytocin Binding Buffer: 50 mM HEPES, 10 mM MnCl<sub>2</sub>, pH 7.4

Alpha1 Binding Buffer: 20 mM Tris HCl, 145 mM NaCl, pH 7.4

Alpha2 Binding Buffer: 50 mM Tris HCl, 5 mM MgCl<sub>2</sub>, pH 7.7

Beta Binding Buffer: 50 mM Tris HCl, 3 mM MnCl<sub>2</sub>, pH 7.7

Muscarinic Binding Buffer: 50 mM Tris HCl, pH 7.7

Cannabinoid Binding Buffer: 50 mM Tris HCl, 1 mM EDTA, 3 mM MgCl<sub>2</sub>, 5 mg/ml fatty acid-free BSA, pH 7.4

Sigma Binding Buffer: 50 mM Tris HCl, pH 8.0

Angiotensin Binding Buffer: 50 mM Tris HCl, 5 mM MgCl<sub>2</sub>, 150 mM NaCl, 0.5 mg/ml BSA, 100 mM bacitracin, protease inhibitor, pH 7.4

Calcium Channel Buffer: 50 mM Tris HCl, 50 mM NaCl, 1 mM CaCl<sub>2</sub>, pH 7.4

Imidazoline Binding Buffer: 5 mM Tris HCl, 5 mM HEPES, 0.5 mM EGTA, 0.5 mM EDTA, 0.5 mM MgCl<sub>2</sub>, pH 8.0



## II. Secondary Radioligand Binding Assays

Serotonin Receptors: 5-HT<sub>1A</sub>, 5-HT<sub>1B</sub>, 5-HT<sub>1D</sub>, 5-HT<sub>1E</sub>, 5-HT<sub>2A</sub>, 5-HT<sub>2B</sub>, 5-HT<sub>2C</sub>, 5-HT<sub>3</sub>, 5-HT<sub>5A</sub>, 5-HT<sub>6</sub> and 5-HT<sub>7</sub>

Note: 5-HT<sub>1F</sub> and 5-HT<sub>4</sub> radioligand competition binding assays are currently under development.

Assay Buffer: Standard Binding Buffer (50 mM Tris-HCl, 10 mM MgCl<sub>2</sub>, 1 mM EDTA, pH 7.4)

Membrane Fraction Source: Transiently or stably transfected cell lines (e.g., HEK293, COS, CHO, NIH3T3)

Protocol adapted from Roth *et al. J Pharmacol Exp Ther* 238(2):480-485 (1986), Roth *et al. J Pharmacol Exp Ther* 268(3):1403-1410 (1994).

### Experimental Procedure and Data Analysis:

A solution of the compound to be tested is prepared as a 1-mg/ml stock in Standard Binding Buffer or DMSO according to its solubility. A similar stock of a reference compound (positive control) is also prepared. Eleven dilutions (5 x assay concentration) of the test and reference (see Table) compounds are prepared in Standard Binding Buffer by serial dilution: 0.05 nM, 0.5 nM, 1.5 nM, 5 nM, 15 nM, 50 nM, 150 nM, 500 nM, 1.5 μM, 5 μM, 50 μM (thus, the corresponding assay concentrations span from 10 pM to 10 μM and include semilog points in the range where high-to-moderate affinity ligands compete with radioligand for binding sites).

Radioligand (see Table) is diluted to five times the assay concentration (see Table 1) in Standard Binding Buffer. Typically, the assay concentration of radioligand is a value between one half the  $K_D$  and the  $K_D$  of a particular radioligand at its target.

Aliquots (50 μl) of radioligand are dispensed into the wells of a 96-well plate (see Figure 1) containing 100 μl of Standard Binding Buffer. Then, duplicate 50-μl aliquots of the test and reference compound dilutions are added (see Figure 1).

Finally, crude membrane fractions of cells expressing recombinant target (prepared from 10-cm plates by harvesting PBS-rinsed monolayers, resuspending and lysing in chilled, hypotonic 50 mM Tris-HCl, pH 7.4, centrifuging at 20,000 x g, decanting the supernatant and storing at -80 degrees centigrade; typically, one 10-cm plate provides sufficient material for 24 wells) are resuspended in 3 ml of chilled Standard Binding Buffer and homogenized by several passages through a 26 gauge needle, then 50 μl are dispensed into each well.

The 250- $\mu$ l reactions are incubated at room temperature and shielded from light (to prevent photolysis of light-sensitive ligands) for 1.5 hours, then harvested by rapid filtration onto Whatman GF/B glass fiber filters pre-soaked with 0.3% polyethyleneimine using a 96-well Brandel harvester. Four rapid 500- $\mu$ l washes are performed with chilled Standard Binding Buffer to reduce non-specific binding. Filters are placed in 6-ml scintillation tubes and allowed to dry overnight. The next day, 4 ml of EcoScint scintillation cocktail (National Diagnostics) are added to each tube. The tubes are capped, labeled, and counted by liquid scintillation counting. For higher throughput assays, bound radioactivity is harvested onto 0.3% polyethyleneimine-treated, 96-well filter mats using a 96-well Filtermate harvester. The filter mats are dried, then scintillant is melted onto the filters and the radioactivity retained on the filters is counted in a Microbeta scintillation counter. Currently, nearly all of our radioligand binding assays have been adapted to this higher throughput approach.

Raw data (dpm) representing total radioligand binding (*i.e.*, specific + non-specific binding) are plotted as a function of the logarithm of the molar concentration of the competitor (*i.e.*, test or reference compound). Non-linear regression of the normalized (*i.e.*, percent radioligand binding compared to that observed in the absence of test or reference compound) raw data is performed in Prism 4.0 (GraphPad Software) using the built-in three parameter logistic model describing ligand competition binding to radioligand-labeled sites:

$$y = \text{bottom} + [(\text{top} - \text{bottom}) / (1 + 10^{\text{x} - \log \text{IC}_{50}})]$$

where bottom equals the residual radioligand binding measured in the presence of 10  $\mu$ M reference compound (*i.e.*, non-specific binding) and top equals the total radioligand binding observed in the absence of competitor. The log  $\text{IC}_{50}$  (*i.e.*, the log of the ligand concentration that reduces radioligand binding by 50%) is thus estimated from the data and used to obtain the  $K_i$  by applying the Cheng-Prusoff approximation:

$$K_i = \text{IC}_{50} / (1 + [\text{ligand}] / K_D)$$

where [ligand] equals the assay radioligand concentration and  $K_D$  equals the affinity constant of the radioligand for the target receptor.

| Receptor           | Radioligand (Assay Conc.)             | Reference Compound |
|--------------------|---------------------------------------|--------------------|
| 5-HT <sub>1A</sub> | [ <sup>3</sup> H]8-OH-DPAT (0.5 nM)   | Methysergide       |
| 5-HT <sub>1B</sub> | [ <sup>3</sup> H]GR125743 (0.3 nM)    | Ergotamine         |
| 5-HT <sub>1D</sub> | [ <sup>3</sup> H]GR125743 (0.3 nM)    | Ergotamine         |
| 5-HT <sub>1E</sub> | [ <sup>3</sup> H]5-HT (3 nM)          | 5-HT               |
| 5-HT <sub>2A</sub> | [ <sup>3</sup> H]Ketanserin (0.5 nM)  | Chlorpromazine     |
| 5-HT <sub>2B</sub> | [ <sup>3</sup> H]LSD (1 nM)           | 5-HT               |
| 5-HT <sub>2C</sub> | [ <sup>3</sup> H]Mesulergine (0.5 nM) | Chlorpromazine     |
| 5-HT <sub>3</sub>  | [ <sup>3</sup> H]LY278584 (0.3 nM)    | LY278584           |
| 5-HT <sub>5A</sub> | [ <sup>3</sup> H]LSD (1 nM)           | Ergotamine         |
| 5-HT <sub>6</sub>  | [ <sup>3</sup> H]LSD (1 nM)           | Chlorpromazine     |
| 5-HT <sub>7</sub>  | [ <sup>3</sup> H]LSD (1 nM)           | Chlorpromazine     |

**Table 2. Serotonin (5-HT) receptor radioligands, radioligand assay concentrations, and reference compounds.**

**Figure 1.** Schematic of binding assay plate. Increasing concentrations (from left to right) of reference or test compound (diluted in buffer) are added (50 µl aliquots, in duplicate) from 5x stocks to wells containing 50 µl of 5x radioligand (fixed concentration, prepared in buffer) and 100 µl of buffer. Finally, 50 µl of receptor-containing membrane homogenate (5x suspension in buffer) are added to achieve a final assay volume of 250 µl. Final concentrations of reference or test compound are listed above the columns.

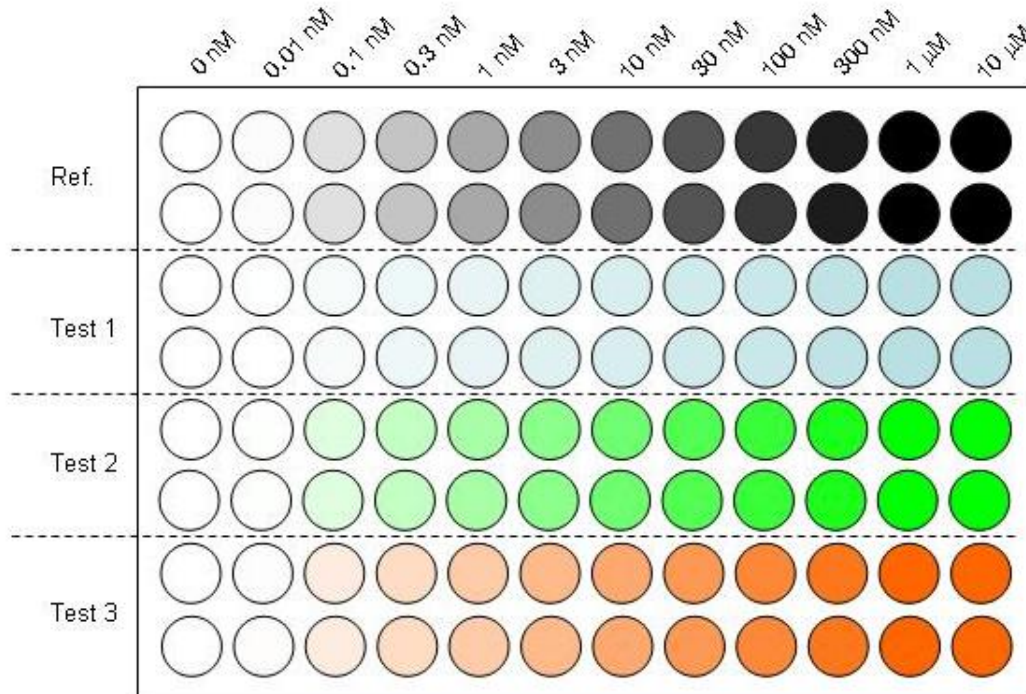

**Figure 2.** Radioligand binding isotherms for competition binding assays wherein reference compounds and PDSP investigator-submitted compounds were assayed in parallel at the serotonin receptors available for screening.

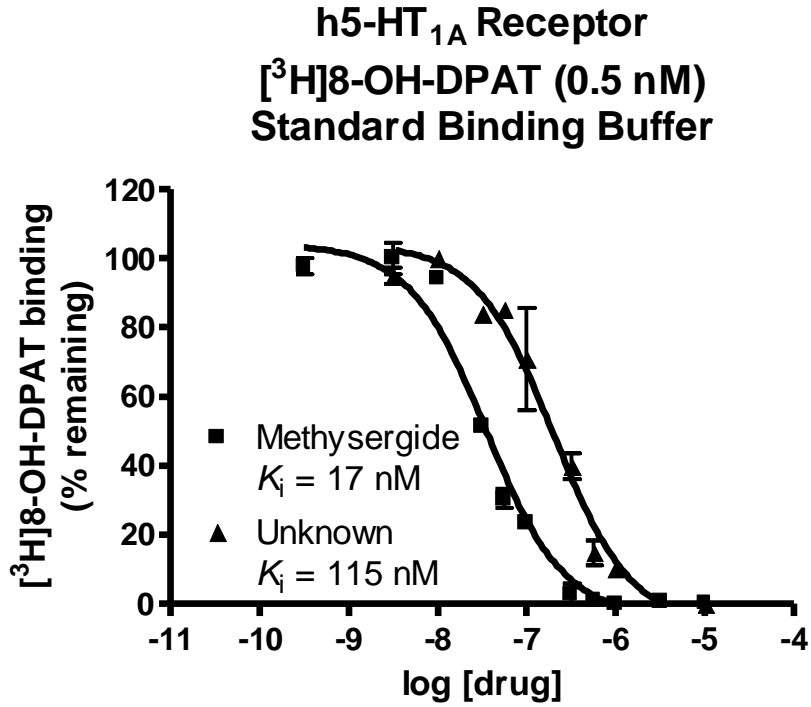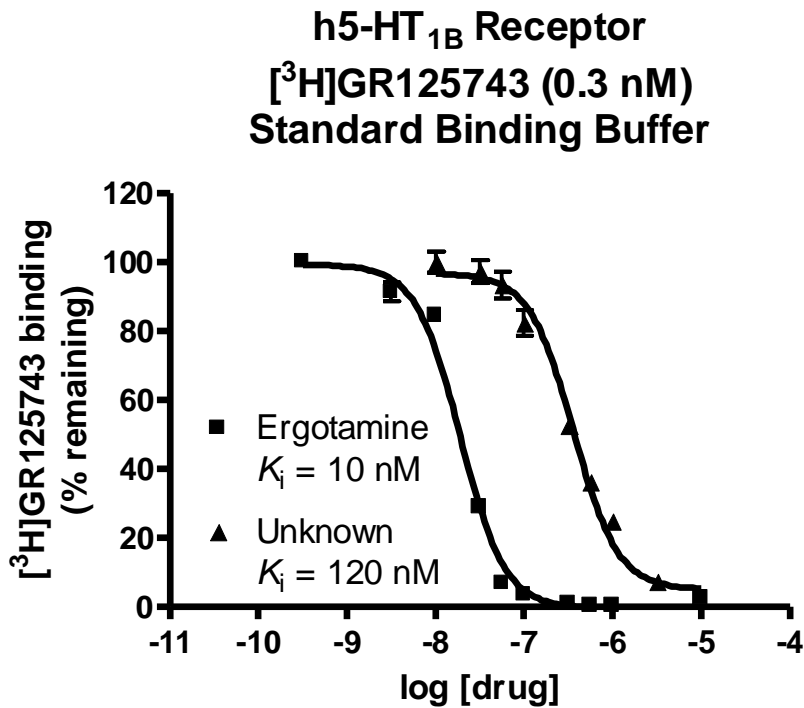

**h5-HT<sub>1D</sub> Receptor**  
**[<sup>3</sup>H]GR125743 (0.3 nM)**  
**Standard Binding Buffer**

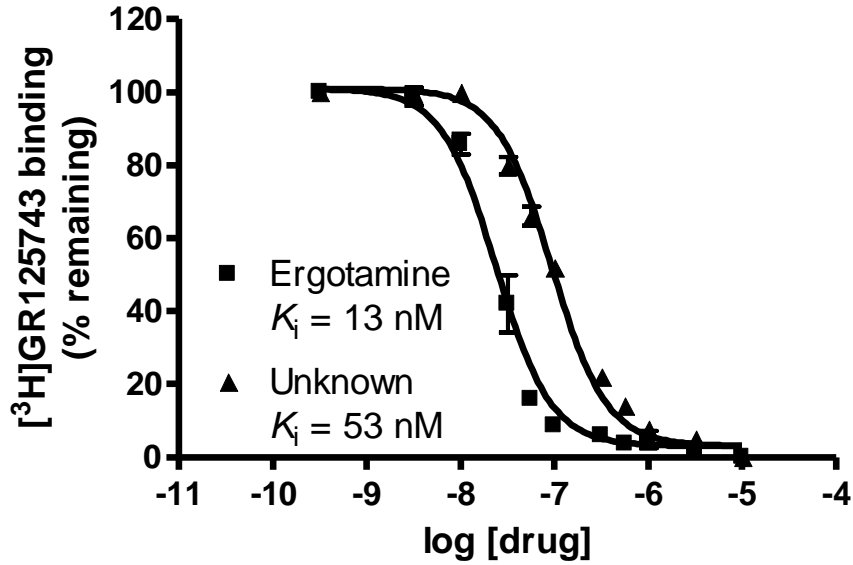

**h5-HT<sub>1E</sub> Receptor**  
**[<sup>3</sup>H]5-HT (3 nM)**  
**Standard Binding Buffer**

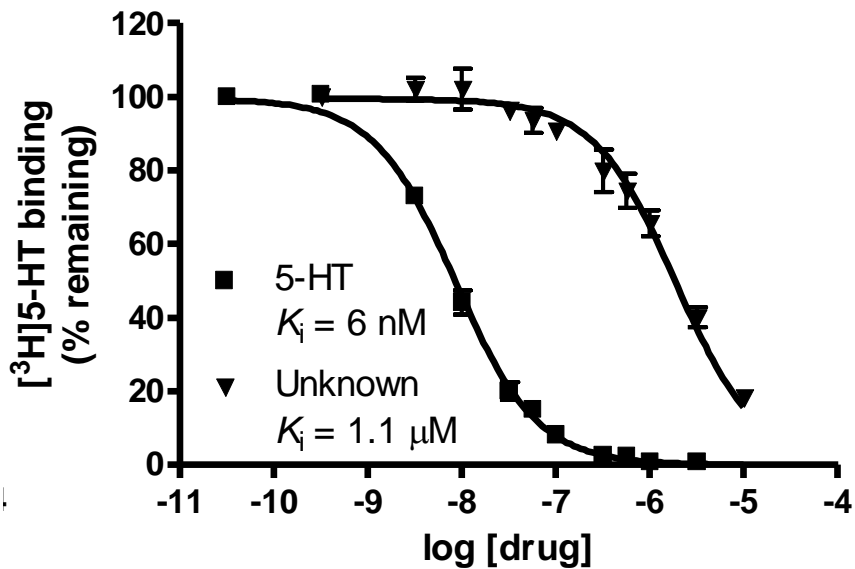

**h5-HT<sub>2A</sub> Receptor**  
**[<sup>3</sup>H]Ketanserin (0.5 nM)**  
**Standard Binding Buffer**

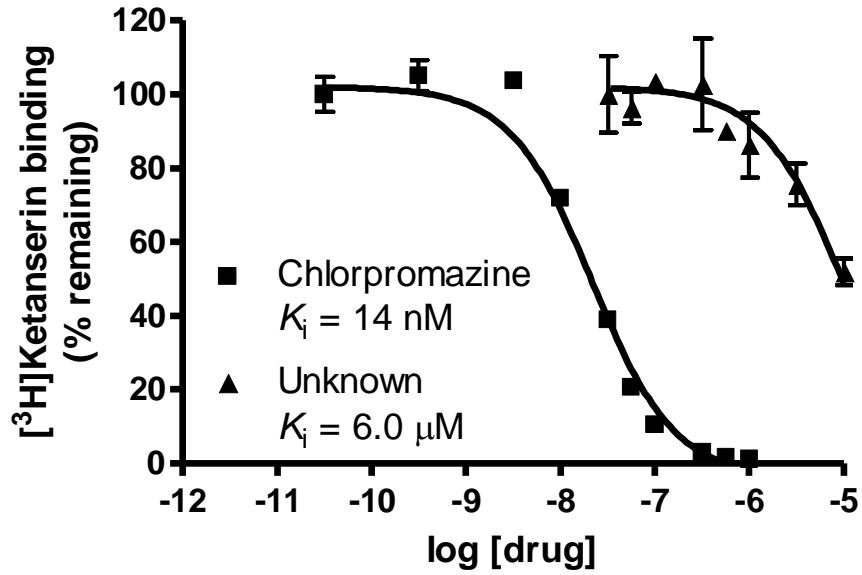

**h5-HT<sub>2B</sub> Receptor**  
**[<sup>3</sup>H]LSD (1 nM)**  
**Standard Binding Buffer**

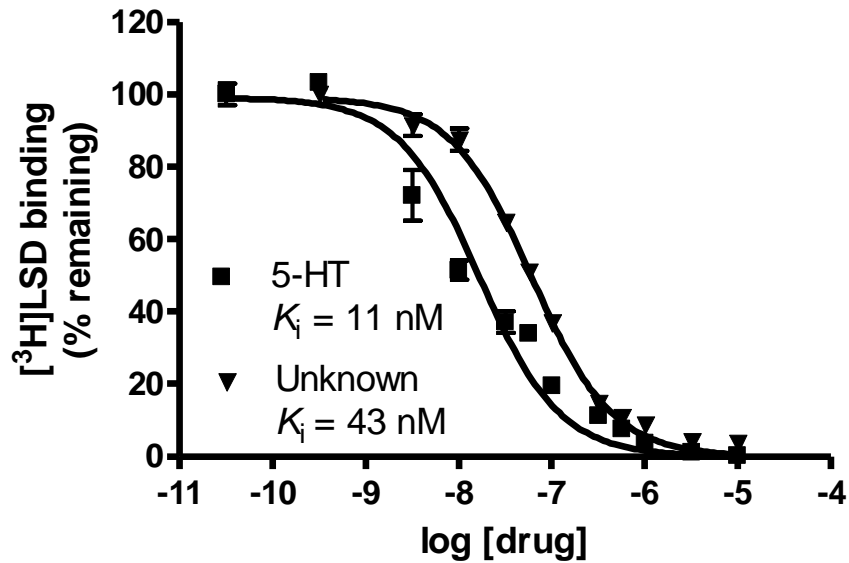

**h5-HT<sub>2C</sub> Receptor**  
**[<sup>3</sup>H]Mesulergine (0.5 nM)**  
**Standard Binding Buffer**

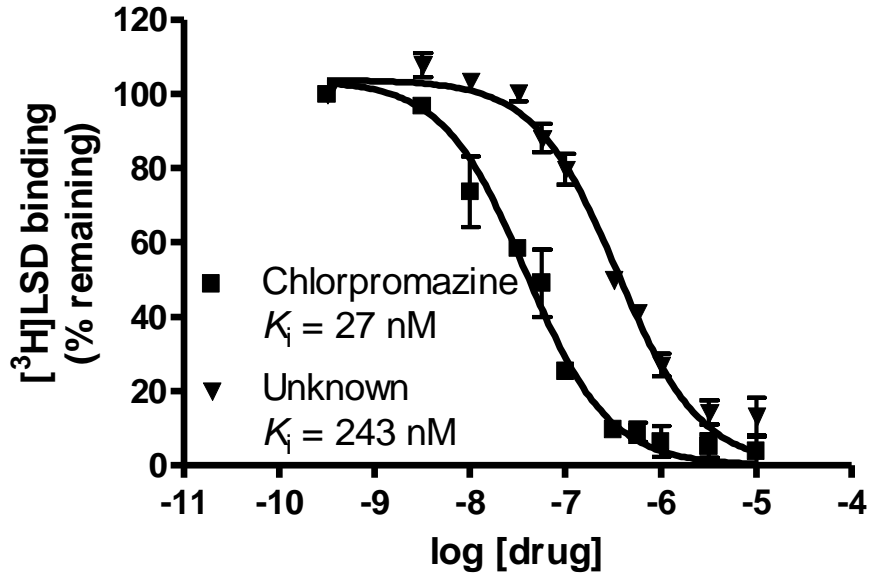

**h5-HT<sub>3</sub> Receptor**  
**[<sup>3</sup>H]LY-278,584 (0.3 nM)**  
**Standard Binding Buffer**

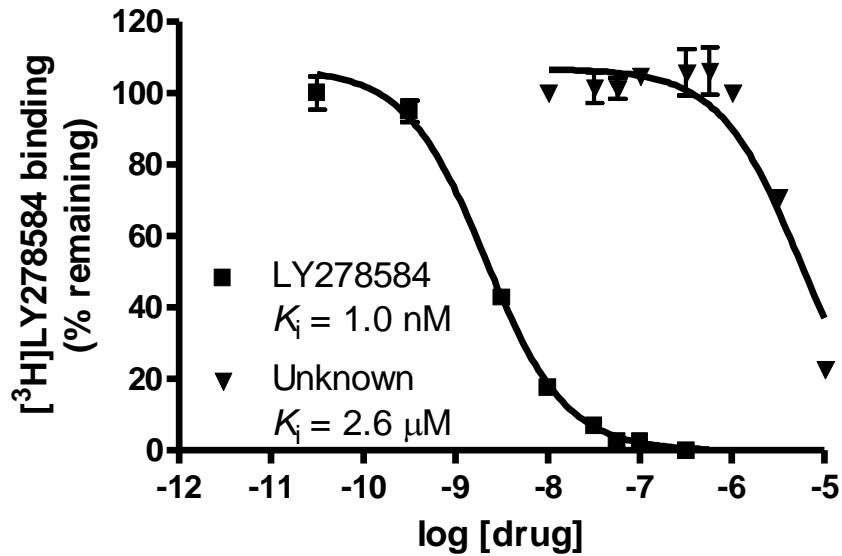

**h5-HT<sub>5A</sub> Receptor**  
**[<sup>3</sup>H]LSD (1 nM)**  
**Standard Binding Buffer**

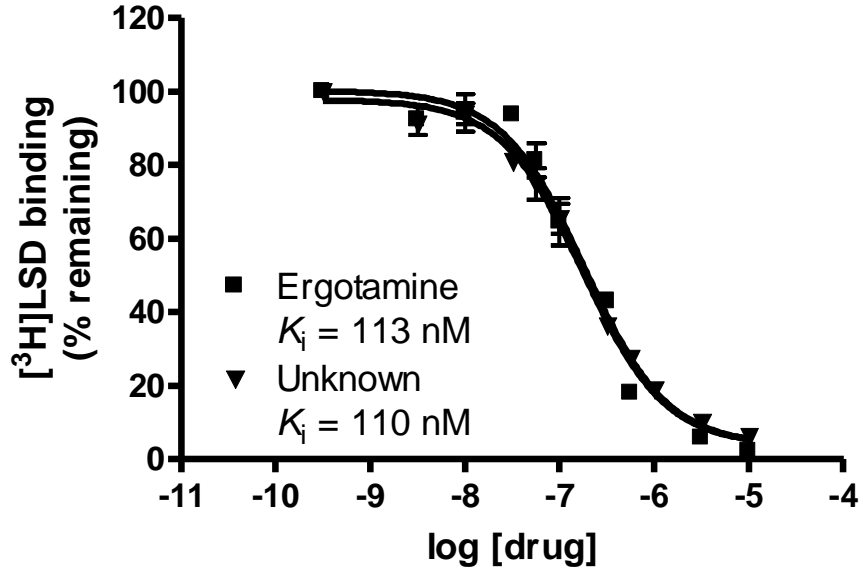

**h5-HT<sub>6</sub> Receptor**  
**[<sup>3</sup>H]LSD (1 nM)**  
**Standard Binding Buffer**

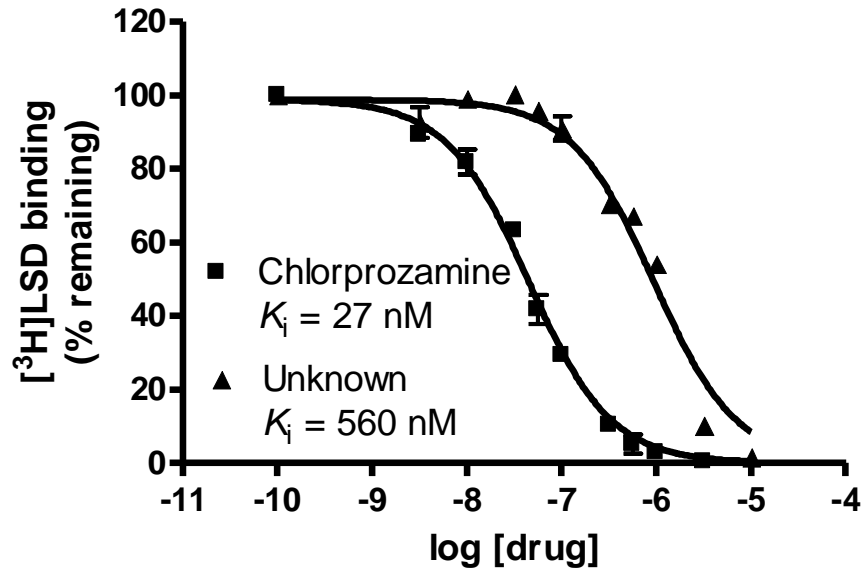



**h5-HT<sub>7</sub> Receptor  
[<sup>3</sup>H]LSD (1 nM)  
Standard Binding Buffer**

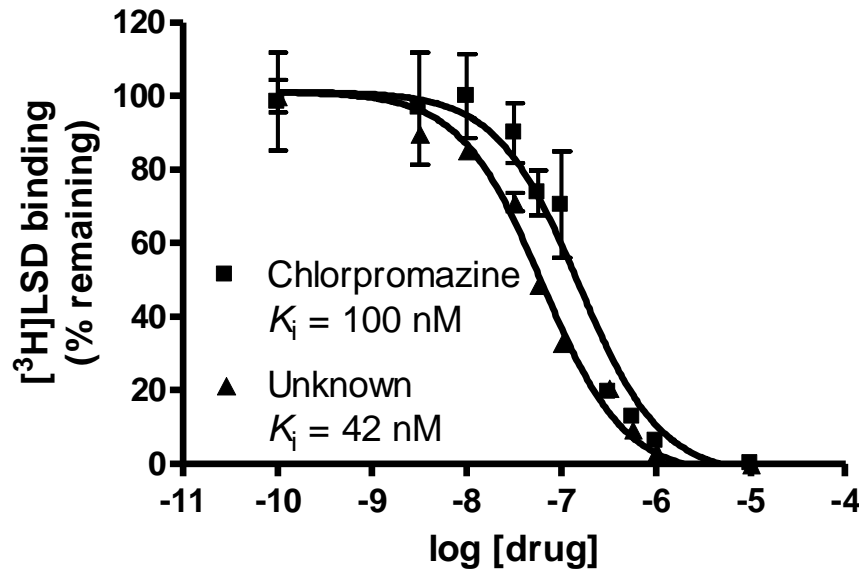

Dopamine Receptors: D<sub>1</sub>, D<sub>2</sub>, D<sub>3</sub>, D<sub>4</sub>, D<sub>5</sub>

Assay Buffers: Dopamine Binding Buffer (50 mM NaCl, 50 mM HEPES-HCl, 5 mM MgCl<sub>2</sub>, 0.5 mM EDTA, pH 7.4)

Membrane Fraction Source: Transiently or stably transfected cell lines (e.g., HEK293, COS, CHO, NIH3T3)

Protocol adapted from Roth *et al. Psychopharmacology* 120(3):365-368 (1995).

Experimental Procedure and Data Analysis:

A solution of the compound to be tested is prepared as a 1-mg/ml stock in Dopamine Binding Buffer or DMSO according to its solubility. A similar stock of a reference compound (positive control) is also prepared. Eleven dilutions (5 x assay concentration) of the test and reference (see Table) compounds are prepared in Dopamine Binding Buffer by serial dilution: 0.05 nM, 0.5 nM, 1.5 nM, 5 nM, 15 nM, 50 nM, 150 nM, 500 nM, 1.5 μM, 5 μM, 50 μM (thus, the corresponding assay concentrations span from 10 pM to 10 μM and include semilog points in the range where high-to-moderate affinity ligands compete with radioligand for binding sites).

Radioligand (see Table 2) is diluted to five times the assay concentration (see Table 2) in Dopamine Binding Buffer. Typically, the assay concentration of radioligand is a value between one half the  $K_D$  and the  $K_D$  of a particular radioligand at its target.

Aliquots (50 μl) of radioligand are dispensed into the wells of a 96-well plate (see Figure 1) containing 100 μl of Dopamine Binding Buffer. Then, duplicate 50-μl aliquots of the test and reference compound dilutions are added (see Figure 1).

Finally, crude membrane fractions of cells expressing recombinant target (prepared from 10-cm plates by harvesting PBS-rinsed monolayers, resuspending and lysing in chilled, hypotonic 50 mM Tris-HCl, pH 7.4, centrifuging at 20,000 x g, decanting the supernatant and storing at -80 degrees centigrade; typically, one 10-cm plate provides sufficient material for 24 wells) are resuspended in 3 ml of chilled Dopamine Binding Buffer and homogenized by several passages through a 26 gauge needle, then 50 μl are dispensed into each well.

The 250-μl reactions are incubated at room temperature and shielded from light (to prevent photolysis of light-sensitive ligands) for 1.5 hours, then harvested by rapid filtration onto Whatman GF/B glass fiber filters pre-soaked with 0.3% polyethyleneimine using a 96-well Brandel harvester. Four rapid 500-μl washes are performed with chilled Standard Binding Buffer to reduce non-specific binding. Filters are placed in 6-ml scintillation tubes and allowed to dry overnight.

The next day, 4 ml of EcoScint scintillation cocktail (National Diagnostics) are added to each tube. The tubes are capped, labeled, and counted by liquid scintillation counting. For higher throughput assays, bound radioactivity is harvested onto 0.3% polyethyleneimine-treated, 96-well filter mats using a 96-well Filtermate harvester. The filter mats are dried, then scintillant is melted onto the filters and the radioactivity retained on the filters is counted in a Microbeta scintillation counter. Currently, nearly all of our radioligand binding assays have been adapted to this higher throughput approach.

Raw data (dpm) representing total radioligand binding (*i.e.*, specific + non-specific binding) are plotted as a function of the logarithm of the molar concentration of the competitor (*i.e.*, test or reference compound). Non-linear regression of the normalized (*i.e.*, percent radioligand binding compared to that observed in the absence of test or reference compound) raw data is performed in Prism 4.0 (GraphPad Software) using the built-in three parameter logistic model describing ligand competition binding to radioligand-labeled sites:

$$y = \text{bottom} + [(\text{top}-\text{bottom})/(1 + 10^{\text{x}-\log\text{IC}_{50}})]$$

where bottom equals the residual radioligand binding measured in the presence of 10  $\mu\text{M}$  reference compound (*i.e.*, non-specific binding) and top equals the total radioligand binding observed in the absence of competitor. The log  $\text{IC}_{50}$  (*i.e.*, the log of the ligand concentration that reduces radioligand binding by 50%) is thus estimated from the data and used to obtain the  $K_i$  by applying the Cheng-Prusoff approximation:

$$K_i = \text{IC}_{50}/(1 + [\text{ligand}]/K_D)$$

where [ligand] equals the assay radioligand concentration and  $K_D$  equals the affinity constant of the radioligand for the target receptor.

| Receptor       | Radioligand (Assay Conc.)                            | Reference Compound |
|----------------|------------------------------------------------------|--------------------|
| D <sub>1</sub> | [ <sup>3</sup> H]SCH23390 (0.2 nM)                   | SKF38393           |
| D <sub>2</sub> | [ <sup>3</sup> H] <i>N</i> -methylspiperone (0.2 nM) | Haloperidol        |
| D <sub>3</sub> | [ <sup>3</sup> H] <i>N</i> -methylspiperone (0.2 nM) | Chlorpromazine     |
| D <sub>4</sub> | [ <sup>3</sup> H] <i>N</i> -methylspiperone (0.3 nM) | Chlorpromazine     |
| D <sub>5</sub> | [ <sup>3</sup> H]SCH23390 (0.2 nM)                   | SKF38393           |

**Table 3. Dopamine receptor radioligands, radioligand assay concentrations, and reference compounds.**

**Figure 3.** Radioligand binding isotherms for competition binding assays wherein reference compounds and PDSP investigator-submitted compounds were assayed in parallel at the dopamine receptors.

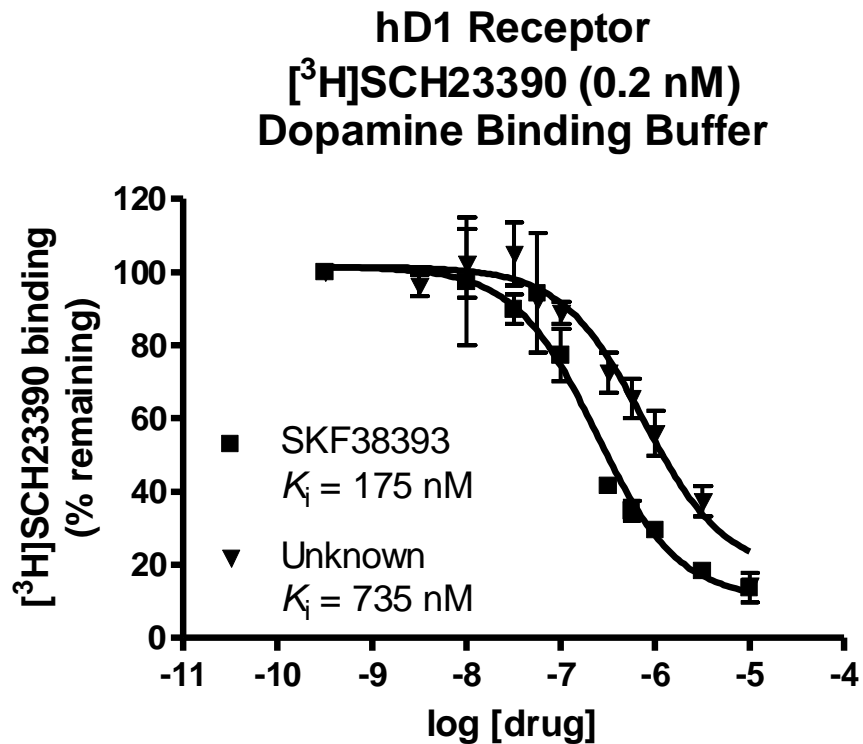

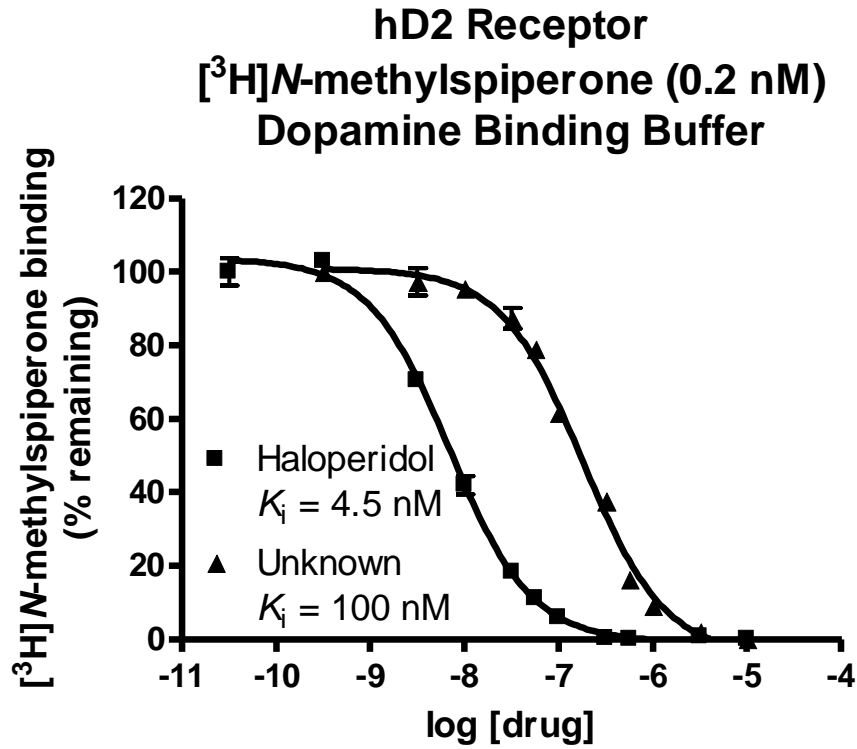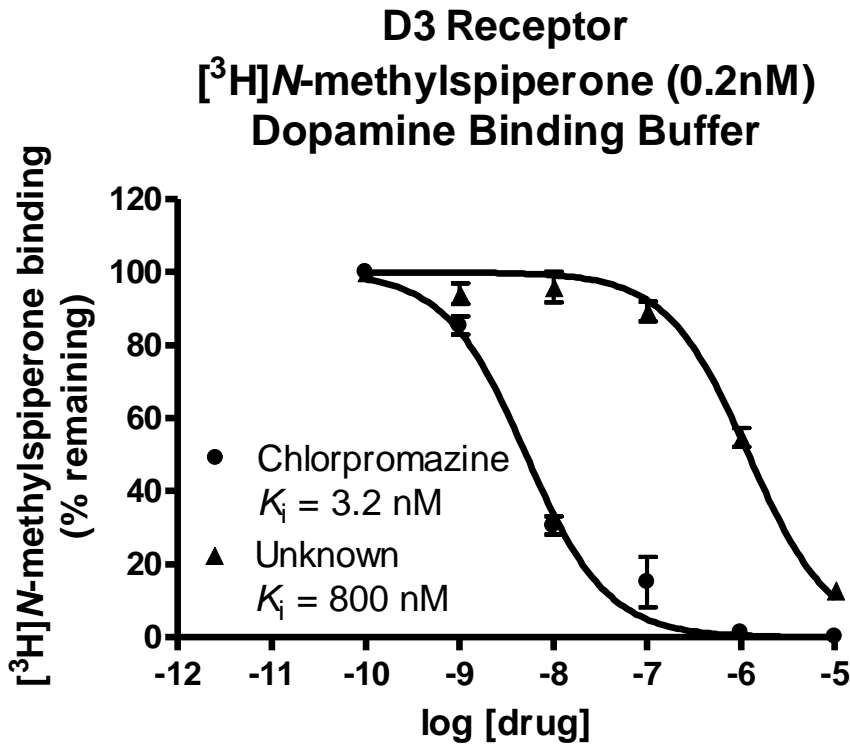

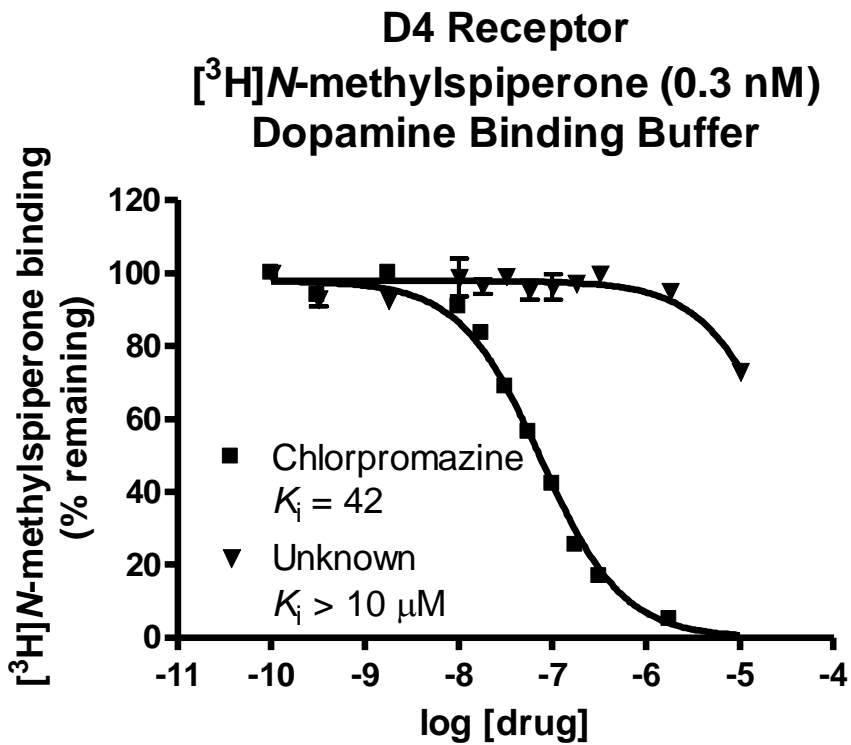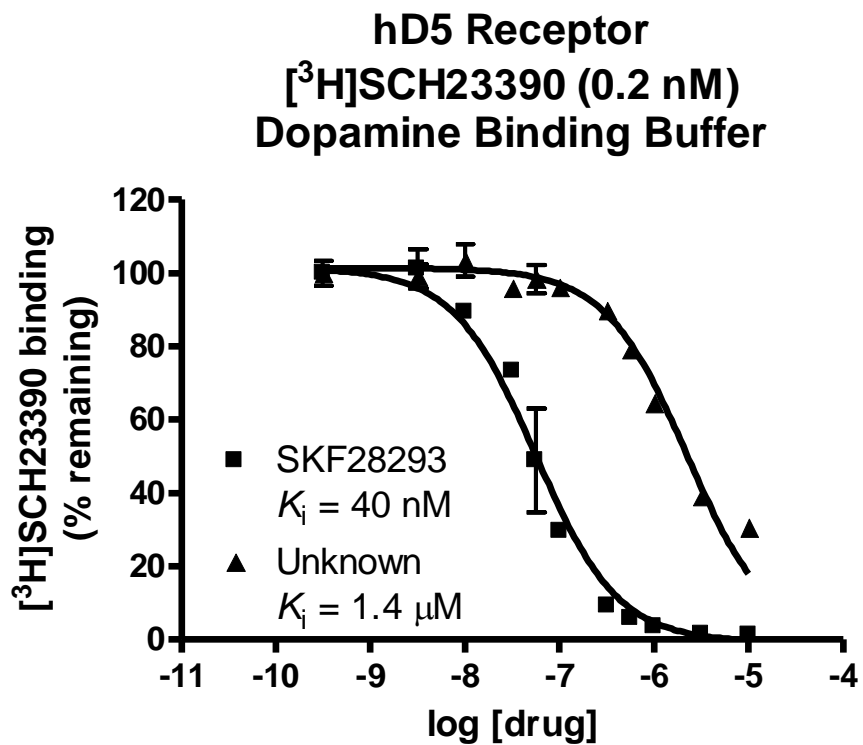

Glutamate Receptors (Ionotropic): NMDA Receptor (MK801 site)

Note: NMDA receptor NMDA site and glycine site, and Kainate and AMPA receptor radioligand competition binding assays are currently under development.

Assay Buffer: 50 mM Tris-HCl, **pH 8.0**

Membrane Fraction Source: Rat brain homogenate

Protocol adapted from Kozikowski *et al. J Med Chem* 33(6):1561-1571 (1990).

Experimental Procedure and Data Analysis:

A solution of the compound to be tested is prepared as a 1-mg/ml stock in 50 mM Tris-HCl, pH 8.0 or DMSO according to its solubility. A similar stock of a reference compound (positive control) is also prepared. Eleven dilutions (5 x assay concentration) of the test and reference (unlabeled MK801) compounds are prepared in 50 mM Tris-HCl by serial dilution: 0.05 nM, 0.5 nM, 1.5 nM, 5 nM, 15 nM, 50 nM, 150 nM, 500 nM, 1.5  $\mu$ M, 5  $\mu$ M, 50  $\mu$ M (thus, the corresponding assay concentrations span from 10 pM to 10  $\mu$ M and include semilog points in the range where high-to-moderate affinity ligands compete with radioligand for binding sites).

Radioligand ( $[^3\text{H}]\text{MK801}$ ) is diluted to 5 nM (five times the assay concentration) in 50 mM Tris-HCl, pH 8.0.

Aliquots (50  $\mu$ l) of radioligand are dispensed into the wells of a 96-well plate (see Figure 1) containing 100  $\mu$ l of 50 mM Tris-HCl, pH 8.0. Then, duplicate 50- $\mu$ l aliquots of the test and reference compound dilutions are added (see Figure 1).

Finally, crude membrane fractions (prepared from rat brain homogenate; see III for details) are resuspended in 3 ml of chilled 50 mM Tris-HCl, pH 8.0 and homogenized by several passages through a 26 gauge needle, then 50  $\mu$ l are dispensed into each well.

The 250- $\mu$ l reactions are incubated at room temperature and shielded from light (to prevent photolysis of light-sensitive ligands) for 1.5 hours, then harvested by rapid filtration onto Whatman GF/B glass fiber filters pre-soaked with 0.3% polyethyleneimine using a 96-well Brandel harvester. Four rapid 500- $\mu$ l washes are performed with chilled Standard Binding Buffer to reduce non-specific binding. Filters are placed in 6-ml scintillation tubes and allowed to dry overnight. The next day, 4 ml of EcoScint scintillation cocktail (National Diagnostics) are added to each tube. The tubes are capped, labeled, and counted by liquid scintillation counting. For higher throughput assays, bound radioactivity is harvested onto 0.3% polyethyleneimine-treated, 96-well filter mats using a 96-

well Filtermate harvester. The filter mats are dried, then scintillant is melted onto the filters and the radioactivity retained on the filters is counted in a Microbeta scintillation counter. Currently, nearly all of our radioligand binding assays have been adapted to this higher throughput approach.

Raw data (dpm) representing total radioligand binding (*i.e.*, specific + non-specific binding) are plotted as a function of the logarithm of the molar concentration of the competitor (*i.e.*, test or reference compound). Non-linear regression of the normalized (*i.e.*, percent radioligand binding compared to that observed in the absence of test or reference compound) raw data is performed in Prism 4.0 (GraphPad Software) using the built-in three parameter logistic model describing ligand competition binding to radioligand-labeled sites:

$$y = \text{bottom} + [(\text{top} - \text{bottom}) / (1 + 10^{x - \log \text{IC}_{50}})]$$

where bottom equals the residual radioligand binding measured in the presence of 10  $\mu\text{M}$  reference compound (*i.e.*, non-specific binding) and top equals the total radioligand binding observed in the absence of competitor. The  $\log \text{IC}_{50}$  (*i.e.*, the log of the ligand concentration that reduces radioligand binding by 50%) is thus estimated from the data and used to obtain the  $K_i$  by applying the Cheng-Prusoff approximation:

$$K_i = \text{IC}_{50} / (1 + [\text{ligand}] / K_D)$$

where [ligand] equals the assay radioligand concentration and  $K_D$  equals the affinity constant of the radioligand for the target receptor.



**Figure 4.** Radioligand binding isotherms for competition binding assays wherein a reference compound and a PDSP investigator-submitted compound were assayed in parallel at the NMDA MK801 site.

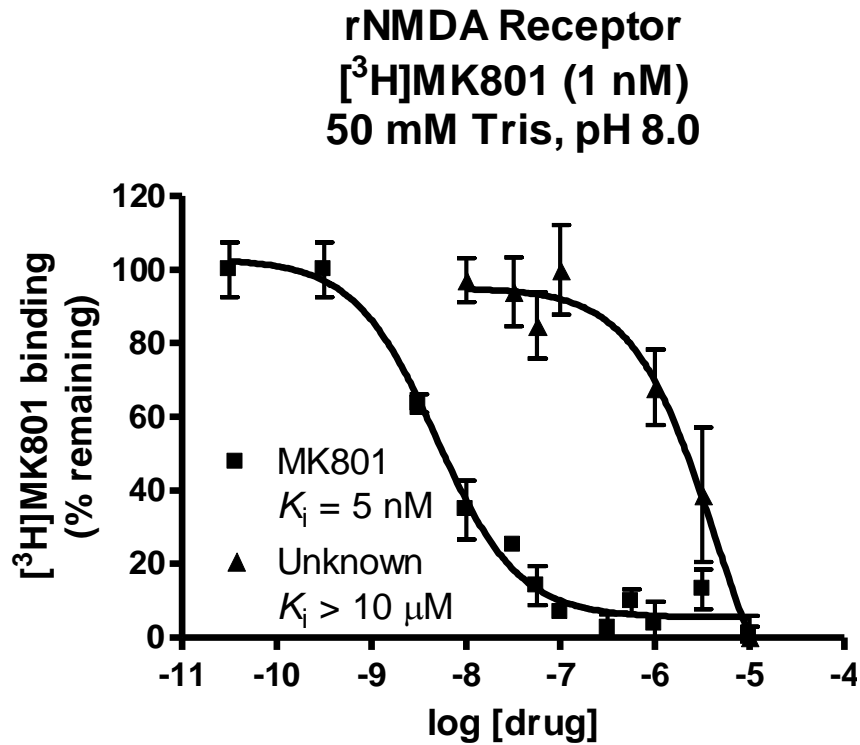

### Glutamate Receptors (metabotropic): mGluR5

Assay Buffer: Standard Binding Buffer (50 mM Tris-HCl, 10 mM MgCl<sub>2</sub>, 0.1 mM EDTA, pH 7.4)

Membrane Fraction Source: Transiently or stably transfected cell lines (e.g., HEK293, COS, CHO, NIH3T3)

Protocol adapted from Kozikowski *et al. J Med Chem* 41(10):1641-1650 (1998).

### Experimental Procedure and Data Analysis:

A solution of the compound to be tested is prepared as a 1-mg/ml stock in the Standard Binding Buffer or DMSO according to its solubility. A similar stock of reference compound (positive control) is also prepared. Eleven dilutions (5 x assay concentration) of the test and reference (MTEP) compounds are prepared in Standard Binding Buffer by serial dilution: 0.05 nM, 0.5 nM, 1.5 nM, 5 nM, 15 nM, 50 nM, 150 nM, 500 nM, 1.5  $\mu$ M, 5  $\mu$ M, 50  $\mu$ M (thus, the corresponding assay concentrations span from 10 pM to 10  $\mu$ M and include semilog points in the range where high-to-moderate affinity ligands compete with radioligand for binding sites).

Radioligand ([<sup>3</sup>H]MPEP) is diluted to 4.5 nM (five times the assay concentration) in Standard Binding Buffer.

Aliquots (50  $\mu$ l) of radioligand are dispensed into the wells of a 96-well plate (see Figure 1) containing 100  $\mu$ l of Standard Binding Buffer. Then, duplicate 50- $\mu$ l aliquots of the test and reference compound dilutions are added (see Figure 1).

Finally, crude membrane fractions of cells expressing recombinant target (prepared from 10-cm plates by harvesting PBS-rinsed monolayers, resuspending and lysing in chilled, hypotonic 50 mM Tris-HCl, pH 7.4, centrifuging at 20,000 x g, decanting the supernatant and storing at -80 degrees centigrade; typically, one 10-cm plate provides sufficient material for 24 wells) are resuspended in 3 ml of chilled Standard Binding Buffer and homogenized by several passages through a 26 guage needle, then 50  $\mu$ l are dispensed into each well.

The 250- $\mu$ l reactions are incubated at room temperature and shielded from light (to prevent photolysis of light-sensitive ligands) for 1 hour, then harvested by rapid filtration onto Whatman GF/B glass fiber filters pre-soaked with 0.3% polyethyleneimine using a 96-well Brandel harvester. Four rapid 500- $\mu$ l washes are performed with chilled Standard Binding Buffer to reduce non-specific binding. Filters are placed in 6-ml scintillation tubes and allowed to dry overnight. The next day, 4 ml of EcoScint scintillation cocktail (National Diagnostics) are added to each tube. The tubes are capped, labeled, and counted by liquid

scintillation counting. For higher throughput assays, bound radioactivity is harvested onto 0.3% polyethyleneimine-treated, 96-well filter mats using a 96-well Filtermate harvester. The filter mats are dried, then scintillant is melted onto the filters and the radioactivity retained on the filters is counted in a Microbeta scintillation counter. Currently, nearly all of our radioligand binding assays have been adapted to this higher throughput approach.

Raw data (dpm) representing total radioligand binding (*i.e.*, specific + non-specific binding) are plotted as a function of the logarithm of the molar concentration of the competitor (*i.e.*, test or reference compound). Non-linear regression of the normalized (*i.e.*, percent radioligand binding compared to that observed in the absence of test or reference compound) raw data is performed in Prism 4.0 (GraphPad Software) using the built-in three parameter logistic model describing ligand competition binding to radioligand-labeled sites:

$$y = \text{bottom} + [(\text{top} - \text{bottom}) / (1 + 10^{x - \log \text{IC}_{50}})]$$

where bottom equals the residual radioligand binding measured in the presence of 10  $\mu\text{M}$  reference compound (*i.e.*, non-specific binding) and top equals the total radioligand binding observed in the absence of competitor. The  $\log \text{IC}_{50}$  (*i.e.*, the log of the ligand concentration that reduces radioligand binding by 50%) is thus estimated from the data and used to obtain the  $K_i$  by applying the Cheng-Prusoff approximation:

$$K_i = \text{IC}_{50} / (1 + [\text{ligand}] / K_D)$$

where [ligand] equals the assay radioligand concentration and  $K_D$  equals the affinity constant of the radioligand for the target receptor.

**Figure 5.** Radioligand binding isotherms for competition binding assays wherein a reference compound and a PDSP investigator-submitted compound were assayed in parallel at mGluR5.

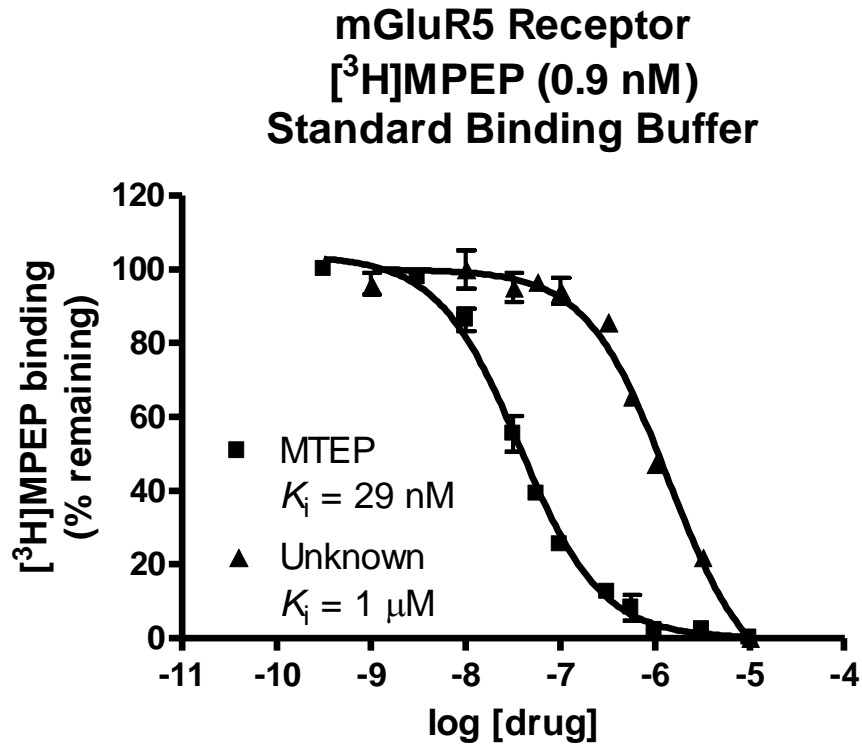

GABA Receptors: GABA<sub>A</sub> (rat brain muscimol site), PBR (rat kidney PK11195 site), recombinant  $\alpha 1\beta 2\gamma 2$ ,  $\alpha 2\beta 2\gamma 2$ ,  $\alpha 3\beta 2\gamma 2$ ,  $\alpha 5\beta 2\gamma 2$

Note: GABA<sub>B</sub> receptor radioligand competition binding assays are under development.

Assay Buffer: 50 mM Tris-**acetate**, pH 7.4 for GABA<sub>A</sub> and recombinant GABA<sub>A</sub>; 50 mM Tris-HCl, pH 7.4 for PBR

Membrane Fraction Source: Rat brain homogenate (GABA<sub>A</sub> muscimol site and PBR PK11195 site); stably or transiently transfected cell lines (HEK293, COS, CHO, NIH3T3) for recombinant  $\alpha 1\beta 2\gamma 2$ ,  $\alpha 2\beta 2\gamma 2$ ,  $\alpha 3\beta 2\gamma 2$ , and  $\alpha 5\beta 2\gamma 2$  receptors

Protocol adapted from Nadler *et al. Brain Res Dev Brain Res* 97(2):216-225 (1996).

#### Experimental Procedure and Data Analysis:

A solution of the compound to be tested is prepared as a 1-mg/ml stock in the appropriate 50 mM Tris buffer or DMSO according to its solubility. A similar stock of a reference compound (positive control) is also prepared. Eleven dilutions (5 x assay concentration) of the test and reference (see Table 3) compounds are prepared in the appropriate 50 mM Tris buffer by serial dilution: 0.05 nM, 0.5 nM, 1.5 nM, 5 nM, 15 nM, 50 nM, 150 nM, 500 nM, 1.5  $\mu$ M, 5  $\mu$ M, 50  $\mu$ M (thus, the corresponding assay concentrations span from 10 pM to 10  $\mu$ M and include semilog points in the range where high-to-moderate affinity ligands compete with radioligand for binding sites).

Radioligand (see Table 3) is diluted to five times the assay concentration (see Table 3) in 50 mM Tris-acetate, pH 7.4. Typically, the assay concentration of radioligand is a value between one half the  $K_D$  and the  $K_D$  of a particular radioligand at its target.

Aliquots (50  $\mu$ l) of radioligand are dispensed into the wells of a 96-well plate (see Figure 1) containing 100  $\mu$ l of 50 mM Tris-acetate, pH 7.4. Then, duplicate 50- $\mu$ l aliquots of the test and reference compound dilutions are added (see Figure 1).

Finally, crude membrane fractions prepared from rat brain homogenate for GABA<sub>A</sub> muscimol site and PBR PK11195 site (see III for details) or, for recombinant  $\alpha 1\beta 2\gamma 3$ ,  $\alpha 2\beta 2\gamma 2$ ,  $\alpha 3\beta 2\gamma 2$ , and  $\alpha 5\beta 2\gamma 2$  receptors, from transfected cells in 10-cm plates (by harvesting PBS-rinsed monolayers, resuspending and lysing in chilled, hypotonic 50 mM Tris-acetate, pH 7.4, centrifuging at 20,000 x g, decanting the supernatant and storing at -80 degrees centigrade; typically, one 10-cm plate provides sufficient material for 24 wells) are resuspended in 3 ml of chilled 50 mM Tris-acetate, pH 7.4 and homogenized by several passages through a 26 guage needle, then 50  $\mu$ l are dispensed into each well.

The 250- $\mu$ l reactions are incubated at room temperature and shielded from light (to prevent photolysis of light-sensitive ligands) for 1.5 hours, then harvested by rapid filtration onto Whatman GF/B glass fiber filters pre-soaked with 0.3% polyethyleneimine using a 96-well Brandel harvester. Four rapid 500- $\mu$ l washes are performed with chilled 50 mM Tris-acetate to reduce non-specific binding. Filters are placed in 6-ml scintillation tubes and allowed to dry overnight. The next day, 4 ml of EcoScint scintillation cocktail (National Diagnostics) are added to each tube. The tubes are capped, labeled, and counted by liquid scintillation counting. For higher throughput assays, bound radioactivity is harvested onto 0.3% polyethyleneimine-treated, 96-well filter mats using a 96-well Filtermate harvester. The filter mats are dried, then scintillant is melted onto the filters and the radioactivity retained on the filters is counted in a Microbeta scintillation counter. Currently, nearly all of our radioligand binding assays have been adapted to this higher throughput approach.

Raw data (dpm) representing total radioligand binding (*i.e.*, specific + non-specific binding) are plotted as a function of the logarithm of the molar concentration of the competitor (*i.e.*, test or reference compound). Non-linear regression of the normalized (*i.e.*, percent radioligand binding compared to that observed in the absence of test or reference compound) raw data is performed in Prism 4.0 (GraphPad Software) using the built-in three parameter logistic model describing ligand competition binding to radioligand-labeled sites:

$$y = \text{bottom} + [(\text{top} - \text{bottom}) / (1 + 10^{\text{x} - \log \text{IC}_{50}})]$$

where bottom equals the residual radioligand binding measured in the presence of 10  $\mu$ M reference compound (*i.e.*, non-specific binding) and top equals the total radioligand binding observed in the absence of competitor. The log  $\text{IC}_{50}$  (*i.e.*, the log of the ligand concentration that reduces radioligand binding by 50%) is thus estimated from the data and used to obtain the  $K_i$  by applying the Cheng-Prusoff approximation:

$$K_i = \text{IC}_{50} / (1 + [\text{ligand}] / K_D)$$

where [ligand] equals the assay radioligand concentration and  $K_D$  equals the affinity constant of the radioligand for the target receptor.

| Receptor          | Radioligand (Assay Conc.)               | Reference Compound |
|-------------------|-----------------------------------------|--------------------|
| GABA <sub>A</sub> | [ <sup>3</sup> H]Muscimol (5 nM)        | GABA               |
| PBR               | [ <sup>3</sup> H]PK11195 (1 nM)         | PK11195            |
| α1β2γ2            | [ <sup>3</sup> H]Flunitrazepam (0.5 nM) | Diazepam           |
| α2β2γ2            | [ <sup>3</sup> H]Flunitrazepam (0.5 nM) | Diazepam           |
| α3β2γ2            | [ <sup>3</sup> H]Flunitrazepam (0.5 nM) | Diazepam           |
| α5β2γ2            | [ <sup>3</sup> H]Flunitrazepam (0.5 nM) | Diazepam           |

**Table 4. GABA receptor radioligands, radioligand assay concentrations, and reference compounds**

**Figure 6.** Radioligand binding isotherms for competition binding assays wherein reference compounds and PDSP investigator-submitted compounds were assayed in parallel at the GABA<sub>A</sub> receptors available for screening.

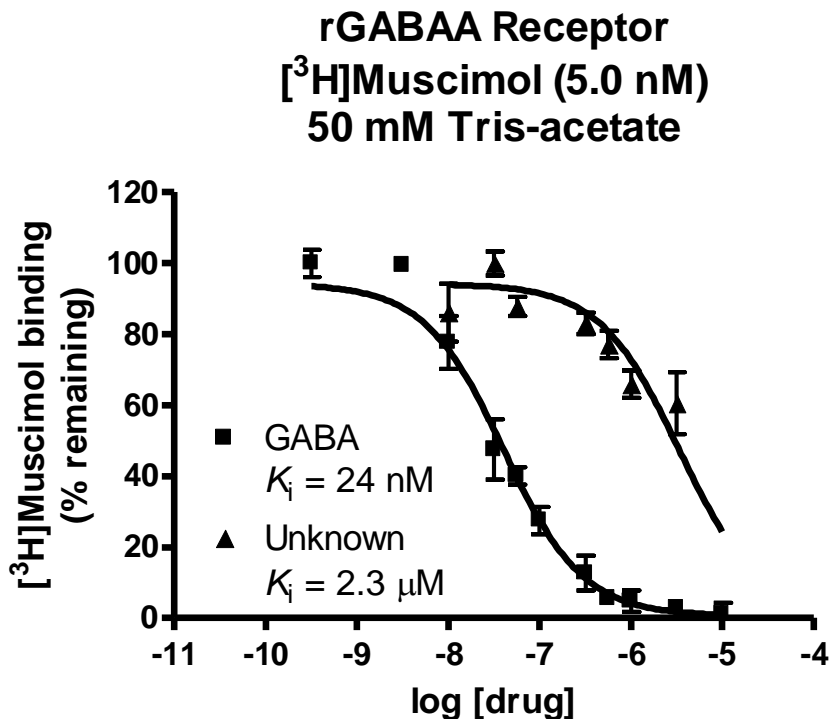

**rPBR Receptor**  
**[<sup>3</sup>H]PK11195 (1 nM)**  
**50 mM Tris-acetate**

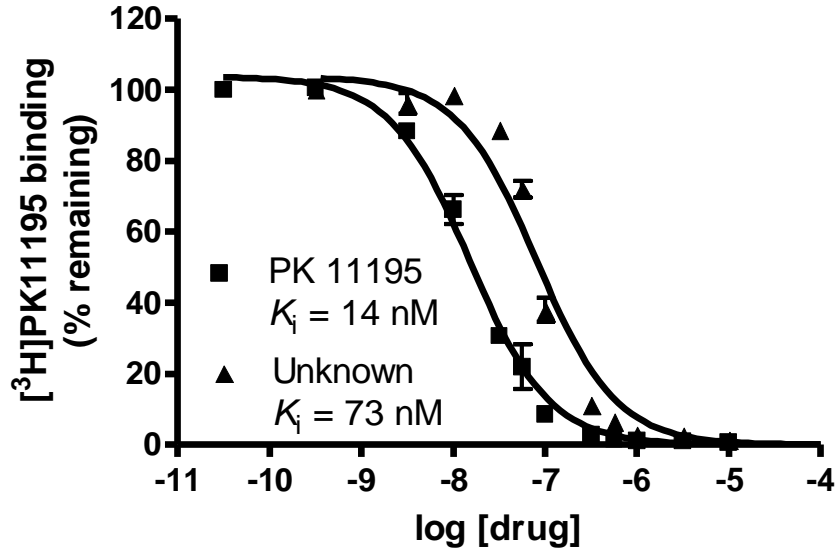

**Alpha1 of GABAA Receptor**  
**[<sup>3</sup>H]Flunitrazepam (0.5 nM)**  
**50 mM Tris-acetate**

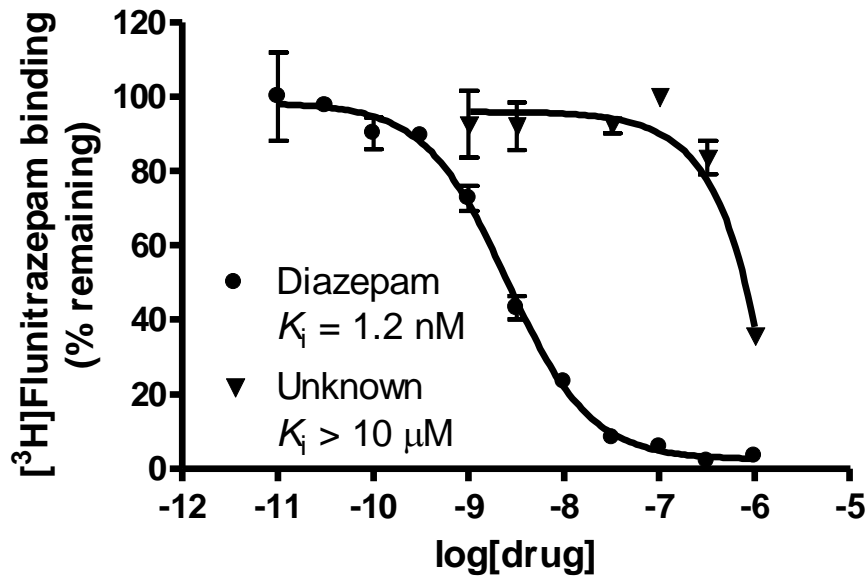



**Alpha2 of GABAA Receptor**  
**[<sup>3</sup>H]Flunitrazepam (0.5 nM)**  
**50 mM Tris-acetate**

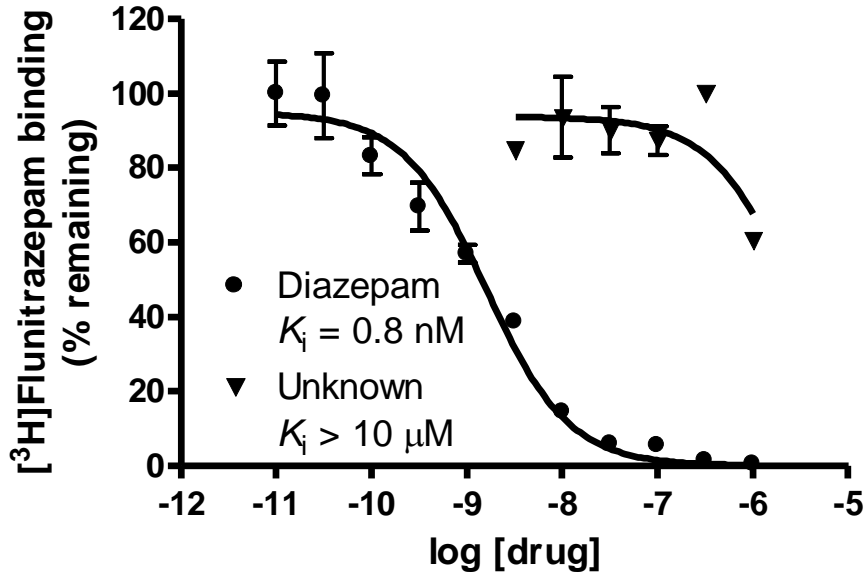

**Alpha3 of GABAA**  
**[<sup>3</sup>H]Flunitrazepam (0.5 nM)**  
**50 mM Tris-acetate**

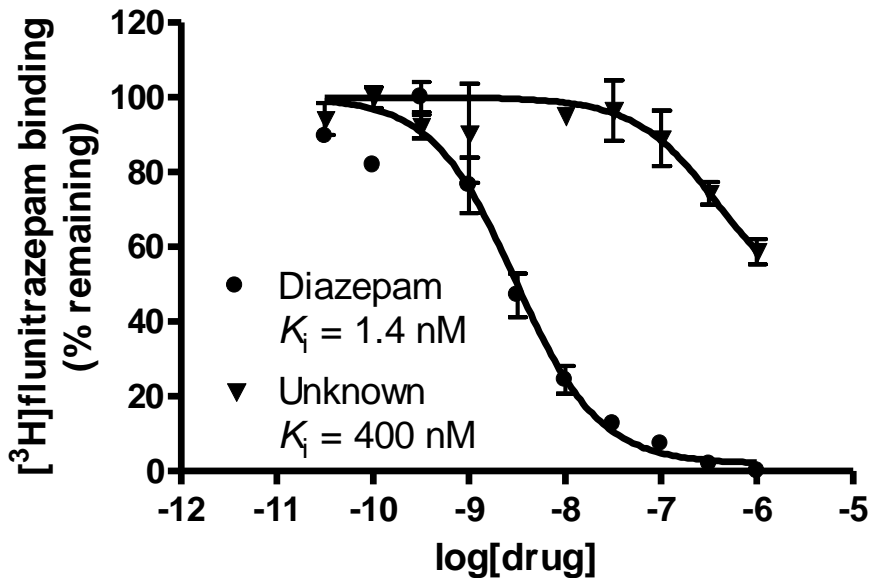

**Alpha5 GABAA Receptor**  
**[<sup>3</sup>H]Flunitrazepam (0.5 nM)**  
**50 mM Tris-acetate**

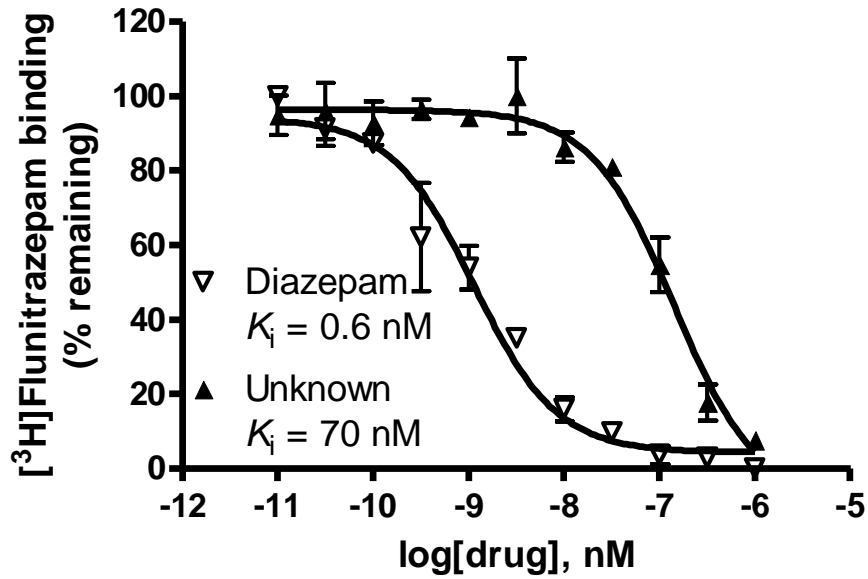

### Biogenic Amine Transporters: SERT, NET, DAT

Note: Glutamate EAAC1, glycine GLYT2, GABA GAT1 and GAT3, VMAT1 and VMAT2 radioligand competition binding assays are under development.

Assay Buffer: Transporter Binding Buffer (150 mM NaCl, 5 mM KCl, 50 mM Tris-HCl, pH 7.4)

Membrane Fraction Source: Transiently or stably transfected cell lines (e.g., HEK293, COS, CHO, NIH3T3)

Protocol adapted from Nakaki *et al. J Neurochem* 45(3):920-925 (1985).

### Experimental Procedure and Data Analysis:

A solution of the compound to be tested is prepared as a 1-mg/ml stock in Transporter Binding Buffer or DMSO according to its solubility. A similar stock of a reference compound (positive control) is also prepared. Eleven dilutions (5 x assay concentration) of the test and reference (see Table 4) compounds are prepared in Transporter Binding Buffer by serial dilution: 0.05 nM, 0.5 nM, 1.5 nM, 5 nM, 15 nM, 50 nM, 150 nM, 500 nM, 1.5  $\mu$ M, 5  $\mu$ M, 50  $\mu$ M (thus, the corresponding assay concentrations span from 10 pM to 10  $\mu$ M and include semilog points in the range where high-to-moderate affinity ligands compete with radioligand for binding sites).

Radioligand (see Table 4) is diluted to five times the assay concentration (see Table 4) in Transporter Binding Buffer. Typically, the assay concentration of radioligand is a value between one half the  $K_D$  and the  $K_D$  of a particular radioligand at its target.

Aliquots (50  $\mu$ l) of radioligand are dispensed into the wells of a 96-well plate (see Figure 1) containing 100  $\mu$ l of Transporter Binding Buffer. Then, duplicate 50- $\mu$ l aliquots of the test and reference compound dilutions are added (see Figure 1).

Finally, crude membrane fractions of cells expressing recombinant target (prepared from 10-cm plates by harvesting PBS-rinsed monolayers, resuspending and lysing in chilled, hypotonic 50 mM Tris-HCl, pH 7.4, centrifuging at 20,000 x g, decanting the supernatant and storing at -80 degrees centigrade; typically, one 10-cm plate provides sufficient material for 24 wells) are resuspended in 3 ml of chilled Transporter Binding Buffer and homogenized by several passages through a 26 gauge needle, then 50  $\mu$ l are dispensed into each well.

The 250- $\mu$ l reactions are incubated at room temperature and shielded from light (to prevent photolysis of light-sensitive ligands) for 1.5 hours, then harvested by rapid filtration onto Whatman GF/B glass fiber filters pre-soaked with 0.3% polyethyleneimine using a 96-well Brandel harvester. Four rapid 500- $\mu$ l washes are performed with chilled Transporter Binding Buffer to reduce non-specific binding. Filters are placed in 6-ml scintillation tubes and allowed to dry overnight. The next day, 4 ml of EcoScint scintillation cocktail (National Diagnostics) are added to each tube. The tubes are capped, labeled, and counted by liquid scintillation counting. For higher throughput assays, bound radioactivity is harvested onto 0.3% polyethyleneimine-treated, 96-well filter mats using a 96-well Filtermate harvester. The filter mats are dried, then scintillant is melted onto the filters and the radioactivity retained on the filters is counted in a Microbeta scintillation counter. Currently, nearly all of our radioligand binding assays have been adapted to this higher throughput approach.

Raw data (dpm) representing total radioligand binding (*i.e.*, specific + non-specific binding) are plotted as a function of the logarithm of the molar concentration of the competitor (*i.e.*, test or reference compound). Non-linear regression of the normalized (*i.e.*, percent radioligand binding compared to that observed in the absence of test or reference compound) raw data is performed in Prism 4.0 using the built-in three parameter logistic model describing ligand competition binding to radioligand-labeled sites:

$$y = \text{bottom} + [(\text{top} - \text{bottom}) / (1 + 10^{\text{x} - \log \text{IC}_{50}})]$$

where bottom equals the residual radioligand binding measured in the presence of 10  $\mu$ M reference compound (*i.e.*, non-specific binding) and top equals the total radioligand binding observed in the absence of competitor. The log  $\text{IC}_{50}$  (*i.e.*, the log of the ligand concentration that reduces radioligand binding by 50%) is thus estimated from the data and used to obtain the  $K_i$  by applying the Cheng-Prusoff approximation:

$$K_i = \text{IC}_{50} / (1 + [\text{ligand}] / K_D)$$

where [ligand] equals the assay radioligand concentration and  $K_D$  equals the affinity constant of the radioligand for the target receptor.

| Transporter | Radioligand (Assay Conc.)            | Reference Compound |
|-------------|--------------------------------------|--------------------|
| SERT        | [ <sup>3</sup> H]Citalopram (0.5 nM) | Amitriptyline      |
| NET         | [ <sup>3</sup> H]Nisoxetine (0.5 nM) | Desipramine        |
| DAT         | [ <sup>3</sup> H]WIN35428 (0.5 nM)   | GBR12909           |

**Table 5. Monoamine transporter radioligands, radioligand assay concentrations, and reference compounds.**

**Figure 7.** Radioligand binding isotherms for competition binding assays wherein reference compounds and PDSP investigator-submitted compounds were assayed in parallel at the biogenic amine transporters available for screening.

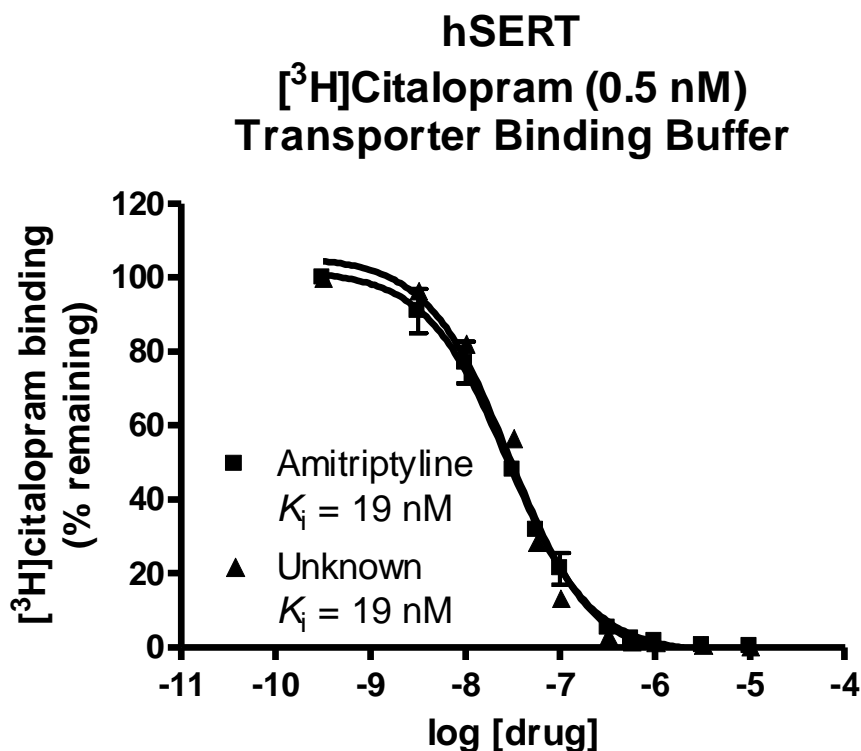

**hNET**  
**[<sup>3</sup>H]Nisoxetine (0.5 nM)**  
**Transporter Binding Buffer**

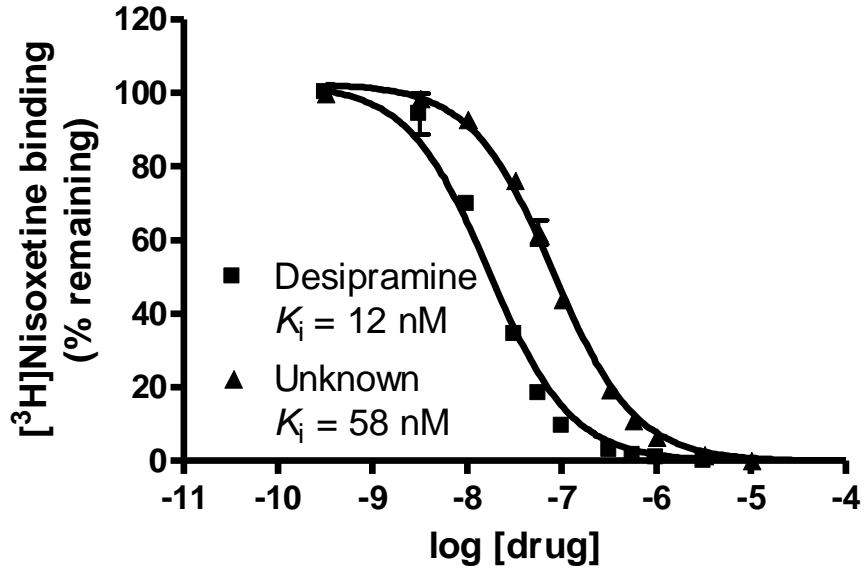

**hDAT Receptor**  
**[<sup>3</sup>H]WIN35428 (0.5 nM)**  
**Transporter Binding Buffer**

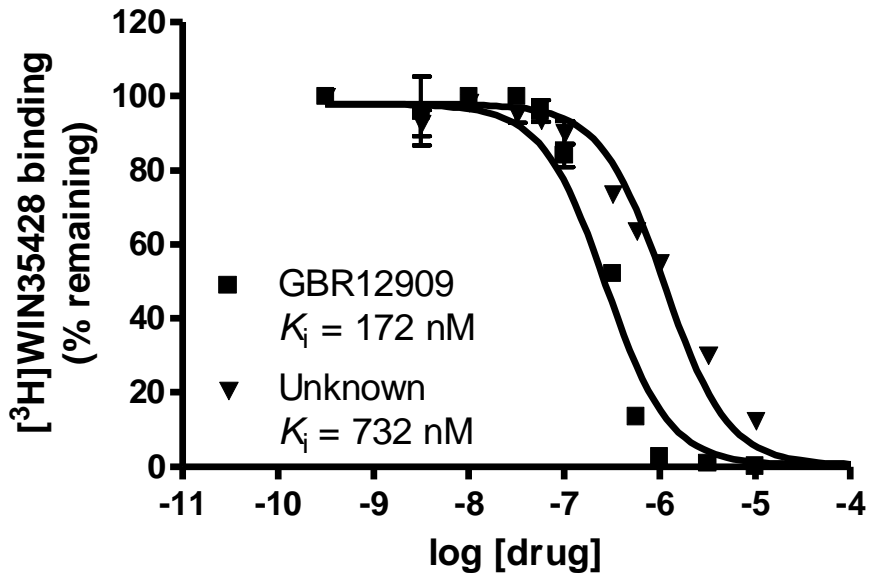

Adrenergic Receptors:  $\alpha_{1A}$ ,  $\alpha_{1B}$ ,  $\alpha_{2A}$ ,  $\alpha_{2B}$ ,  $\alpha_{2C}$ ,  $\beta_1$ ,  $\beta_2$ ,  $\beta_3$

Assay Buffers: For  $\alpha_1$  receptors,  $\alpha_1$  Binding Buffer (20 mM Tris-HCl, 145 mM NaCl, pH 7.4); for  $\alpha_2$  receptors,  $\alpha_2$  Binding Buffer (50 mM Tris-HCl, 5 mM MgCl<sub>2</sub>, pH 7.7); for  $\beta$  receptors,  $\beta$  Binding Buffer (50 mM Tris-HCl, 3 mM MnCl<sub>2</sub>, pH 7.7)

Membrane Fraction Source: Transiently or stably transfected cell lines (e.g., HEK293, COS, CHO, NIH3T3)

Protocol adapted from Arango *et al. Brain Res* 630(1-2):271-282 (1993), Arango *et al. Gen Psychiatry* 47 :1038-1047 (1990)

#### Experimental Procedure and Data Analysis:

A solution of the compound to be tested is prepared as a 1-mg/ml stock in the appropriate buffer or DMSO according to its solubility. A similar stock of a reference compound (positive control) is also prepared. Eleven dilutions (5 x assay concentration) of the test and reference (see Table 5) compounds are prepared in the appropriate buffer by serial dilution: 0.05 nM, 0.5 nM, 1.5 nM, 5 nM, 15 nM, 50 nM, 150 nM, 500 nM, 1.5  $\mu$ M, 5  $\mu$ M, 50  $\mu$ M (thus, the corresponding assay concentrations span from 10 pM to 10  $\mu$ M and include semilog points in the range where high-to-moderate affinity ligands compete with radioligand for binding sites).

Radioligand (see Table 5) is diluted to five times the assay concentration (see Table 5) in the appropriate buffer. Typically, the assay concentration of radioligand is a value between one half the  $K_D$  and the  $K_D$  of a particular radioligand at its target.

Aliquots (50  $\mu$ l) of radioligand are dispensed into the wells of a 96-well plate (see Figure 1) containing 100  $\mu$ l of the appropriate buffer. Then, duplicate 50- $\mu$ l aliquots of the test and reference compound dilutions are added (see Figure 1).

Finally, crude membrane fractions of cells expressing recombinant target (prepared from 10-cm plates by harvesting PBS-rinsed monolayers, resuspending and lysing in chilled, hypotonic 50 mM Tris-HCl, pH 7.4, centrifuging at 20,000 x g, decanting the supernatant and storing at -80 degrees centigrade; typically, one 10-cm plate provides sufficient material for 24 wells) are resuspended in 3 ml of chilled binding buffer and homogenized by several passages through a 26 gauge needle, then 50  $\mu$ l are dispensed into each well.

The 250- $\mu$ l reactions are incubated at room temperature and shielded from light (to prevent photolysis of light-sensitive ligands) for 1 hour (for  $\alpha_1$  receptors, 40 min for  $\alpha_2$  receptors, and 1.5 hours for  $\beta$  receptors), then harvested by rapid filtration onto Whatman GF/B glass fiber filters pre-soaked with 0.3% polyethyleneimine using a 96-well Brandel harvester. Four rapid 500- $\mu$ l washes

are performed with chilled distilled water (for  $\alpha_1$  and  $\beta$  receptors) or 0.1% polyethyleneimine (for  $\alpha_2$  receptors) to reduce non-specific binding. Filters are placed in 6-ml scintillation tubes and allowed to dry overnight. The next day, 4 ml of EcoScint scintillation cocktail (National Diagnostics) are added to each tube. The tubes are capped, labeled, and counted by liquid scintillation counting. For higher throughput assays, bound radioactivity is harvested onto 0.3% polyethyleneimine-treated, 96-well filter mats using a 96-well Filtermate harvester. The filter mats are dried, then scintillant is melted onto the filters and the radioactivity retained on the filters is counted in a Microbeta scintillation counter. Currently, nearly all of our radioligand binding assays have been adapted to this higher throughput approach.

Raw data (dpm) representing total radioligand binding (*i.e.*, specific + non-specific binding) are plotted as a function of the logarithm of the molar concentration of the competitor (*i.e.*, test or reference compound). Non-linear regression of the normalized (*i.e.*, percent radioligand binding compared to that observed in the absence of test or reference compound) raw data is performed in Prism 4.0 using the built-in three parameter logistic model describing ligand competition binding to radioligand-labeled sites:

$$y = \text{bottom} + [(\text{top}-\text{bottom})/(1 + 10^{\text{x}-\log\text{IC}_{50}})]$$

where bottom equals the residual radioligand binding measured in the presence of 10  $\mu\text{M}$  reference compound (*i.e.*, non-specific binding) and top equals the total radioligand binding observed in the absence of competitor. The  $\log \text{IC}_{50}$  (*i.e.*, the log of the ligand concentration that reduces radioligand binding by 50%) is thus estimated from the data and used to obtain the  $K_i$  by applying the Cheng-Prusoff approximation:

$$K_i = \text{IC}_{50}/(1 + [\text{ligand}]/K_D)$$

where [ligand] equals the assay radioligand concentration and  $K_D$  equals the affinity constant of the radioligand for the target receptor.

| Receptor      | Radioligand (Assay Conc.)                 | Reference Compound |
|---------------|-------------------------------------------|--------------------|
| $\alpha_{1A}$ | [ <sup>125</sup> I]HEAT (0.1 nM)          | Urapidil           |
| $\alpha_{1B}$ | [ <sup>125</sup> I]HEAT (0.1 nM)          | Corynanthine       |
| $\alpha_{2A}$ | [ <sup>125</sup> I]Iodoclonidine (0.1 nM) | Oxymetazoline      |
| $\alpha_{2B}$ | [ <sup>125</sup> I]Iodoclonidine (1 nM)   | Prazosin           |
| $\alpha_{2C}$ | [ <sup>125</sup> I]Iodoclonidine (1 nM)   | Prazosin           |
| $\beta_1$     | [ <sup>125</sup> I]Iodopindolol (0.1 nM)  | Alprenolol         |
| $\beta_2$     | [ <sup>125</sup> I]Iodopindolol (0.1 nM)  | Alprenolol         |
| $B_3$         | [ <sup>125</sup> I]Iodopindolol (0.1 nM)  | Alprenolol         |

**Table 6. Adrenergic receptor radioligands, radioligand assay concentrations, and reference compounds.**



**Figure 8.** Radioligand binding isotherms for competition binding assays wherein reference compounds and PDSP investigator-submitted compounds were assayed in parallel at the adrenergic receptors available for screening.

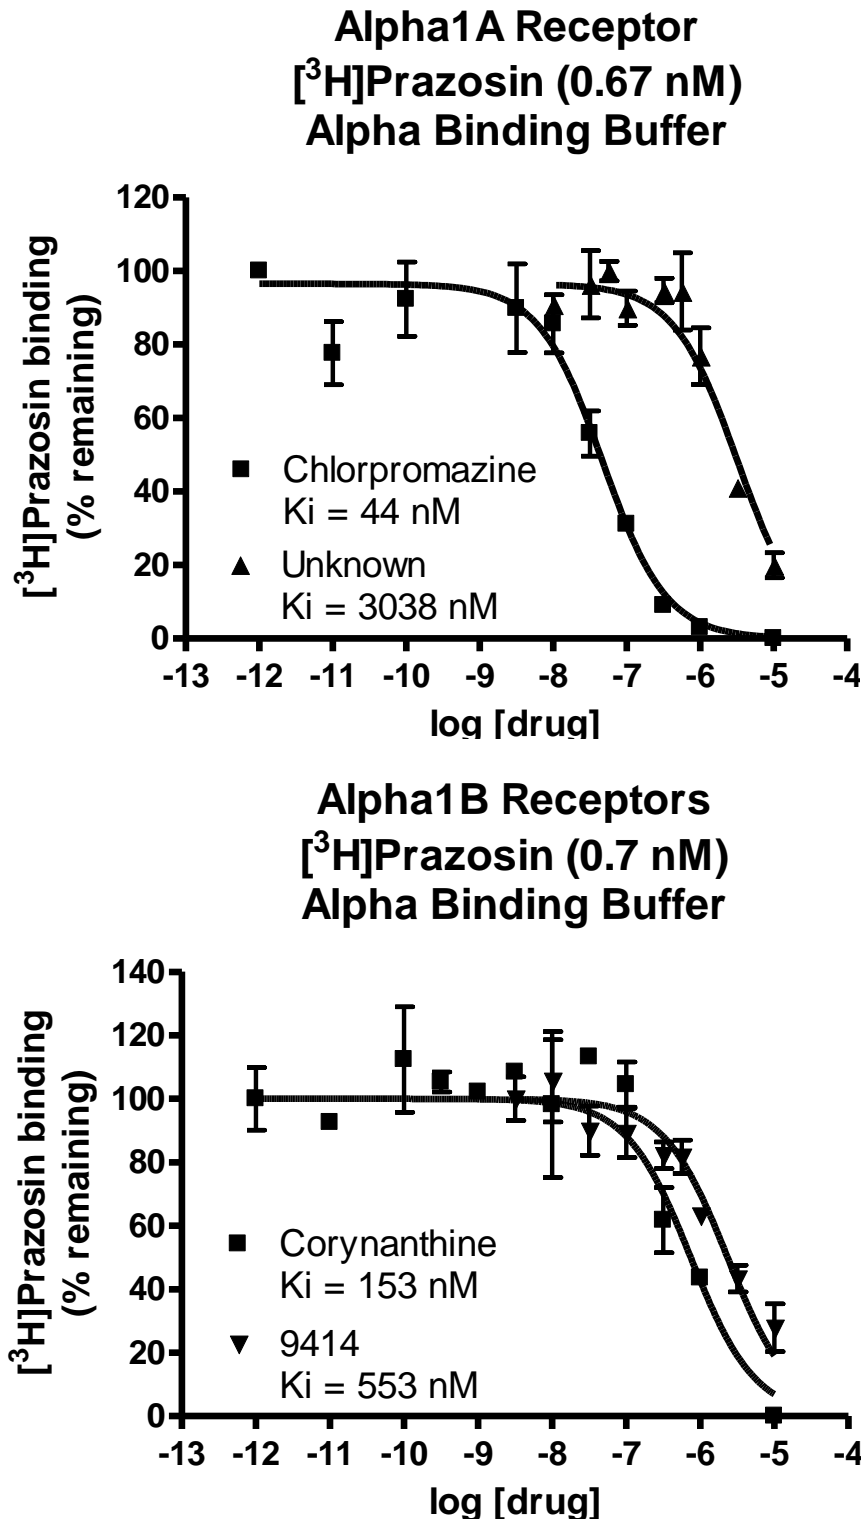

**$\alpha$ 2A-Adrenergic Receptor  
 $[^{125}\text{I}]$ Clonidine (0.1 nM)  
 $\alpha$ 2 Binding Buffer**

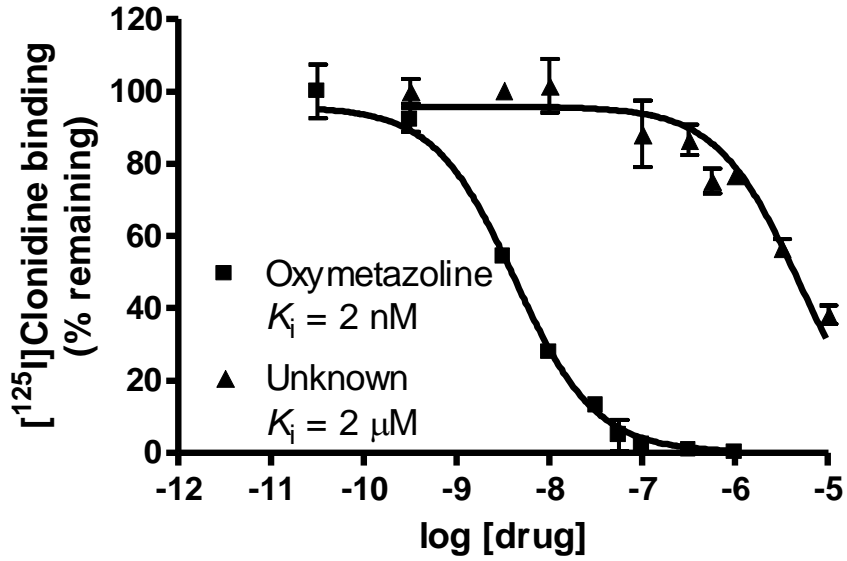

**$h\alpha$ 2B-Adrenergic Receptor  
 $[^3\text{H}]$ Clonidine (1 nM)  
 $\alpha$ 2 Binding Buffer**

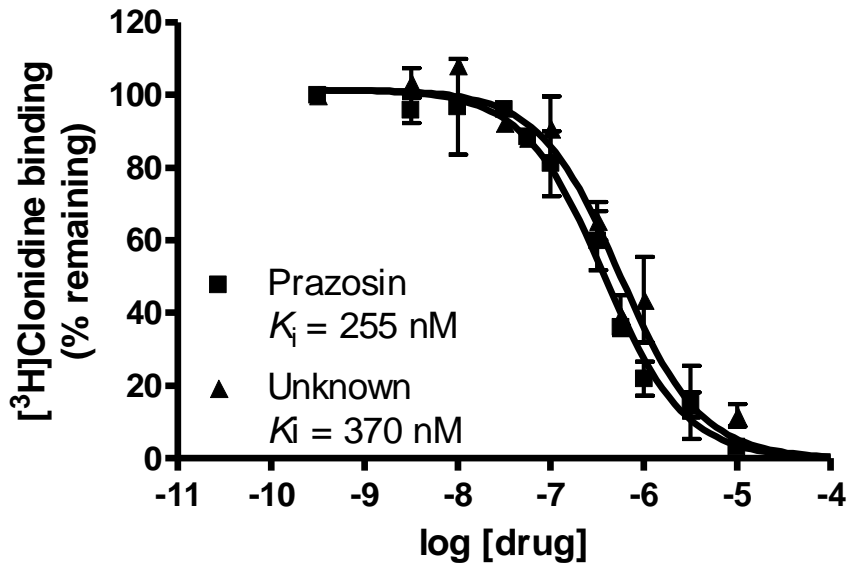

**$\alpha$ 2C-Adrenergic Receptor  
 $[^3\text{H}]$ Clonidine (1.0 nM)  
 $\alpha$ 2 Binding Buffer**

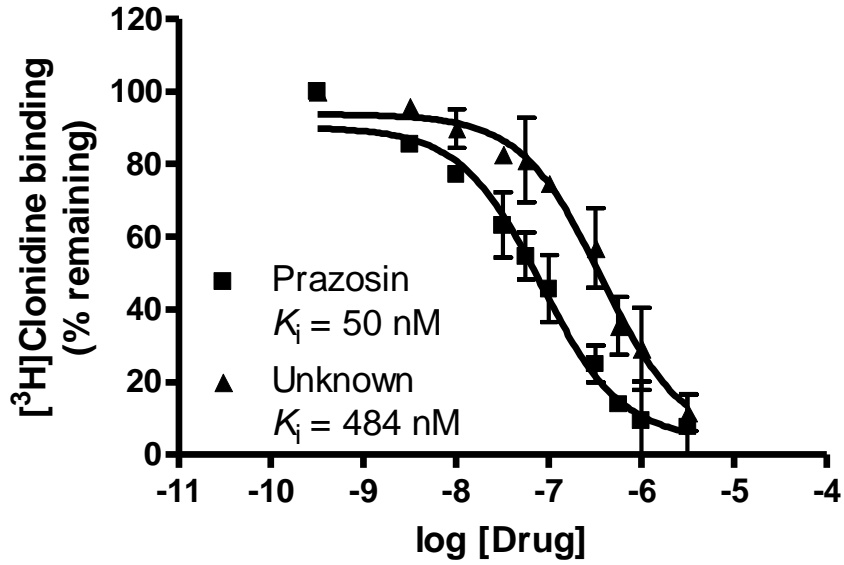

**$\beta$ 1-Adrenergic Receptor  
 $[^{125}\text{I}]$ Iodopindolol (0.1 nM)  
 $\beta$  Binding Buffer**

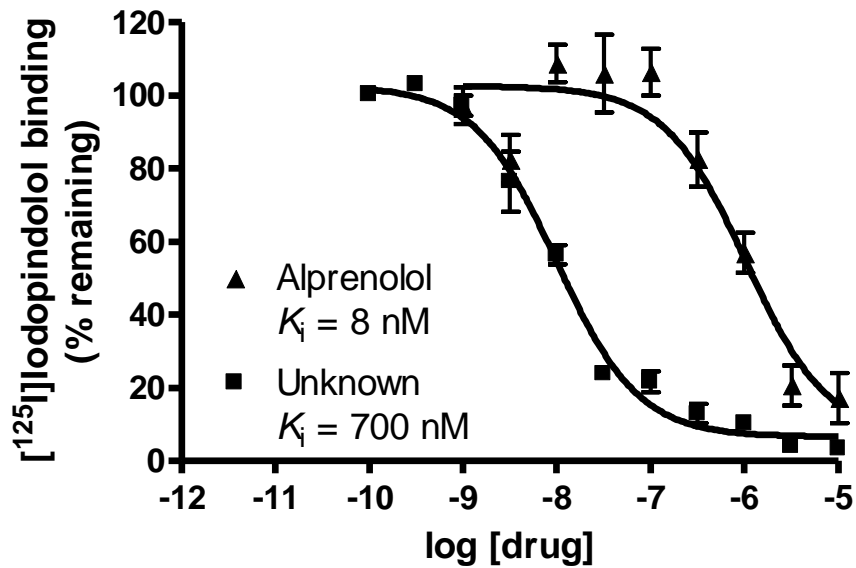

**$\beta$ 2-Adrenergic Receptor  
 $[^{125}\text{I}]$ Iodopindolol (0.1 nM)  
 $\beta$  Binding Buffer**

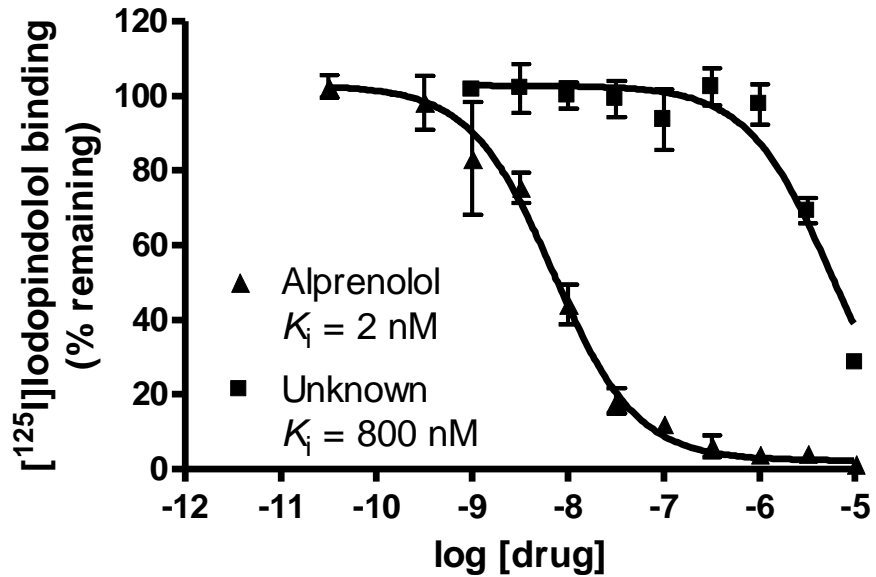

**$\beta$ 3-Adrenergic Receptor  
 $[^{125}\text{I}]$ Iodopindolol (0.1 nM)  
 $\beta$  Binding Buffer**

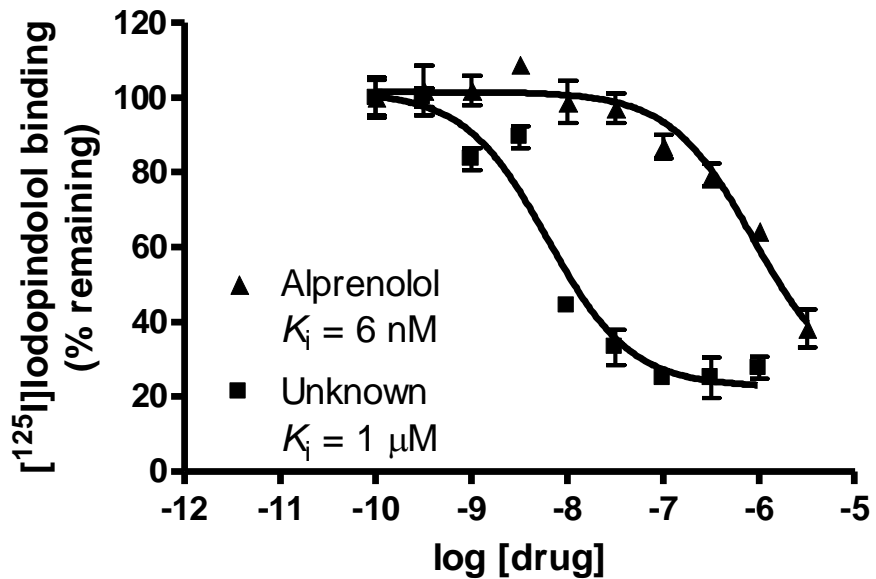

Muscarinic Receptors: M<sub>1</sub>, M<sub>2</sub>, M<sub>3</sub>, M<sub>4</sub>, M<sub>5</sub>

Assay Buffer: Muscarinic Binding Buffer (50 mM Tris-HCl, pH 7.7)

Membrane Fraction Source: Transiently or stably transfected cell lines (e.g., HEK293, COS, CHO, NIH3T3)

Protocol adapted from Ernsberger *et al. Brain Res* 452(1-2):336-344.

Experimental Procedure and Data Analysis:

A solution of the compound to be tested is prepared as a 1-mg/ml stock in Muscarinic Binding Buffer or DMSO according to its solubility. A similar stock of a reference compound (positive control) is also prepared. Eleven dilutions (5 x assay concentration) of the test and reference compound (atropine) are prepared in Muscarinic Binding Buffer by serial dilution: 0.05 nM, 0.5 nM, 1.5 nM, 5 nM, 15 nM, 50 nM, 150 nM, 500 nM, 1.5 μM, 5 μM, 50 μM (thus, the corresponding assay concentrations span from 10 pM to 10 μM and include semilog points in the range where high-to-moderate affinity ligands compete with radioligand for binding sites).

Radioligand (<sup>3</sup>H]QNB) is diluted to 2.5 nM (five times the assay concentration) in Muscarinic Binding Buffer. Typically, the assay concentration of radioligand is a value between one half the  $K_D$  and the  $K_D$  of a particular radioligand at its target.

Aliquots (50 μl) of radioligand are dispensed into the wells of a 96-well plate (see Figure 1) containing 100 μl of Muscarinic Binding Buffer. Then, duplicate 50-μl aliquots of the test and reference compound dilutions are added (see Figure 1).

Finally, crude membrane fractions of cells expressing recombinant target (prepared from 10-cm plates by harvesting PBS-rinsed monolayers, resuspending and lysing in chilled, hypotonic 50 mM Tris-HCl, pH 7.4, centrifuging at 20,000 x g, decanting the supernatant and storing at -80 degrees centigrade; typically, one 10-cm plate provides sufficient material for 24 wells) are resuspended in 3 ml of chilled Muscarinic Binding Buffer and homogenized by several passages through a 26 gauge needle, then 50 μl are dispensed into each well.

The 250-μl reactions are incubated at room temperature and shielded from light (to prevent photolysis of light-sensitive ligands) for 1.5 hours, then harvested by rapid filtration onto Whatman GF/B glass fiber filters pre-soaked with 0.3% polyethyleneimine using a 96-well Brandel harvester. Four rapid 500-μl washes are performed with chilled Standard Binding Buffer to reduce non-specific binding. Filters are placed in 6-ml scintillation tubes and allowed to dry overnight. The next day, 4 ml of EcoScint scintillation cocktail (National Diagnostics) are added to each tube. The tubes are capped, labeled, and counted by liquid

scintillation counting. For higher throughput assays, bound radioactivity is harvested onto 0.3% polyethyleneimine-treated, 96-well filter mats using a 96-well Filtermate harvester. The filter mats are dried, then scintillant is melted onto the filters and the radioactivity retained on the filters is counted in a Microbeta scintillation counter. Currently, nearly all of our radioligand binding assays have been adapted to this higher throughput approach.

Raw data (dpm) representing total radioligand binding (*i.e.*, specific + non-specific binding) are plotted as a function of the logarithm of the molar concentration of the competitor (*i.e.*, test or reference compound). Non-linear regression of the normalized (*i.e.*, percent radioligand binding compared to that observed in the absence of test or reference compound) raw data is performed in Prism 4.0 (GraphPad) using the built-in three parameter logistic model describing ligand competition binding to radioligand-labeled sites:

$$y = \text{bottom} + [(\text{top} - \text{bottom}) / (1 + 10^{\text{x} - \log \text{IC}_{50}})]$$

where bottom equals the residual radioligand binding measured in the presence of 10  $\mu\text{M}$  reference compound (*i.e.*, non-specific binding) and top equals the total radioligand binding observed in the absence of competitor. The  $\log \text{IC}_{50}$  (*i.e.*, the log of the ligand concentration that reduces radioligand binding by 50%) is thus estimated from the data and used to obtain the  $K_i$  by applying the Cheng-Prusoff approximation:

$$K_i = \text{IC}_{50} / (1 + [\text{ligand}] / K_D)$$

where [ligand] equals the assay radioligand concentration and  $K_D$  equals the affinity constant of the radioligand for the target receptor.

**Figure 9.** Radioligand binding isotherms for competition binding assays wherein reference compounds and PDSP investigator-submitted compounds were assayed in parallel at the muscarinic receptors.

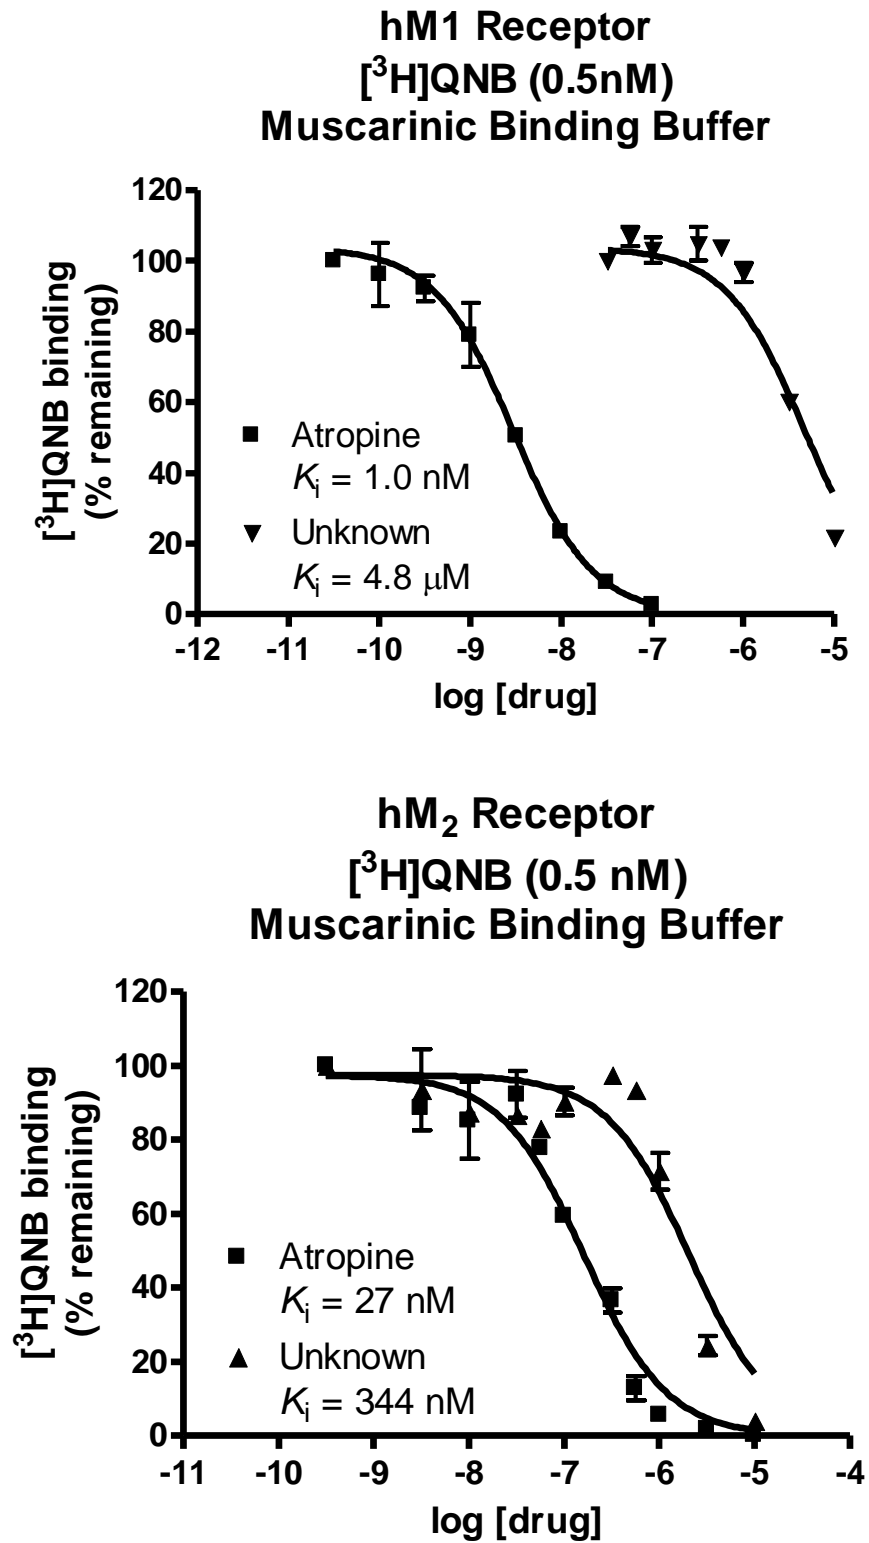

**hM<sub>3</sub> Receptor**  
**[<sup>3</sup>H]QNB (0.5 nM)**  
**Muscarinic Binding Buffer**

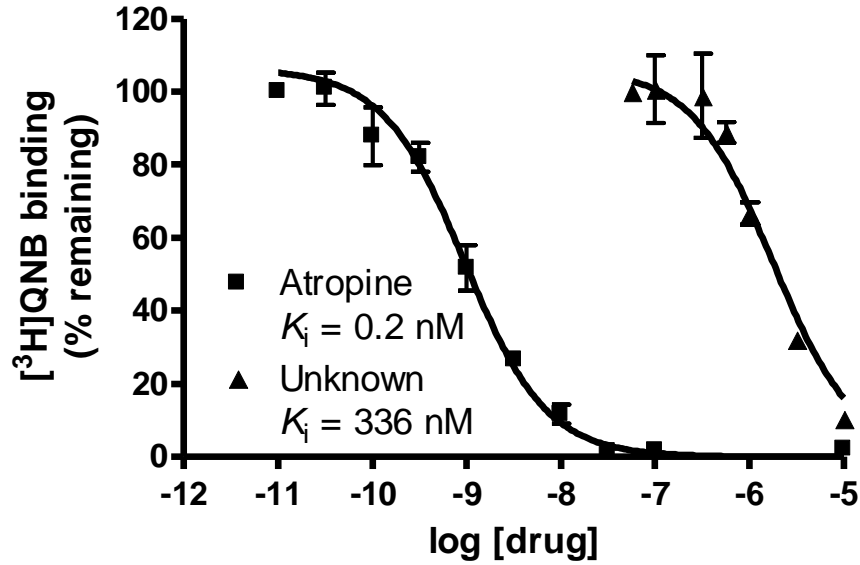

**hM<sub>4</sub> Receptor**  
**[<sup>3</sup>H]QNB (0.5 nM)**  
**Muscarinic Binding Buffer**

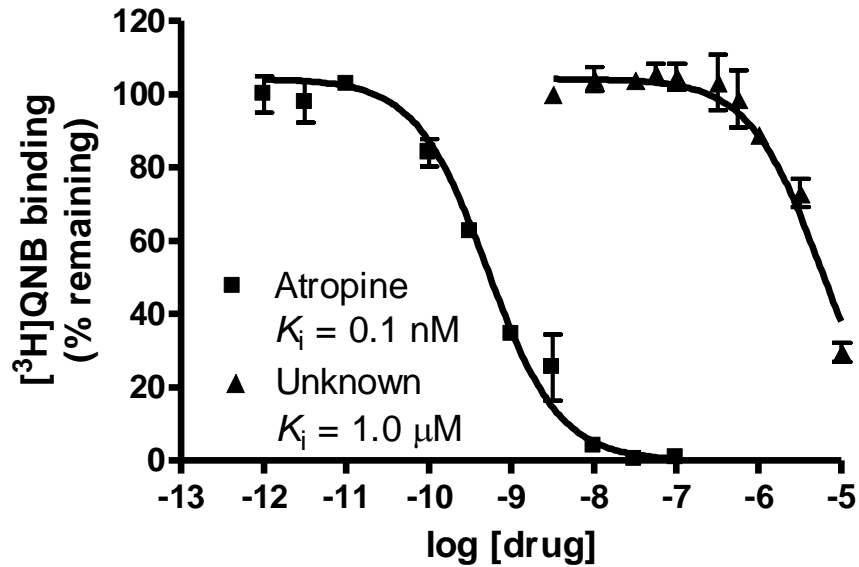



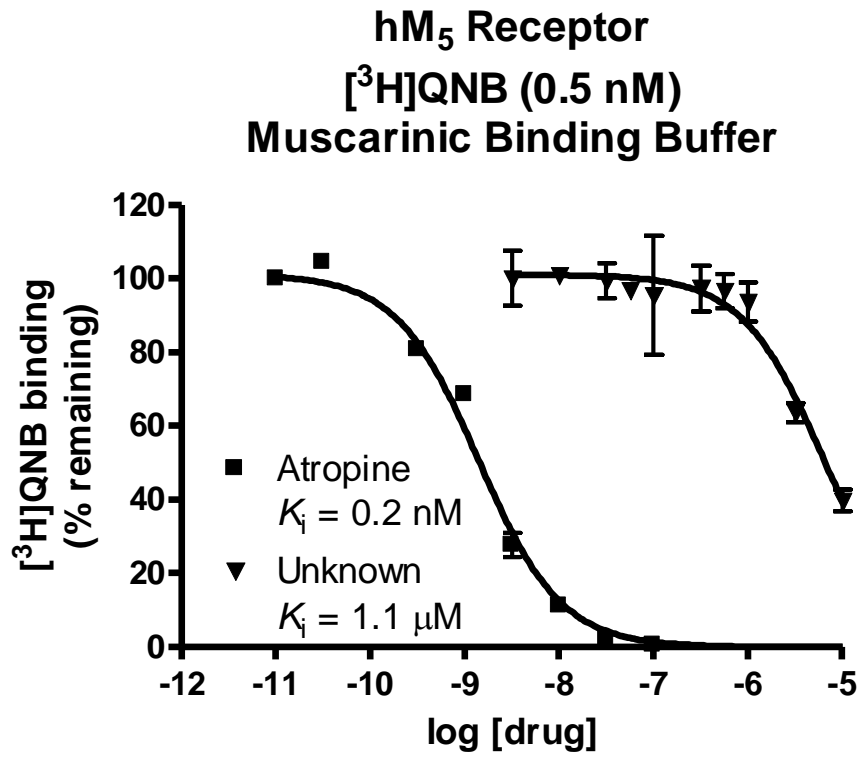

Nicotinic Receptors:  $\alpha 2\beta 2$ ,  $\alpha 2\beta 4$ ,  $\alpha 3\beta 2$ ,  $\alpha 3\beta 4$ ,  $\alpha 4\beta 2$ ,  $\alpha 4\beta 4$ , endogenous  $\alpha 4\beta 2$

Assay Buffer: 50 mM Tris-HCl, pH 7.4

Membrane Fraction Source: Stably transfected cell lines (e.g., HEK293, COS, CHO, NIH3T3) ( $\alpha 2\beta 2$ ,  $\alpha 2\beta 4$ ,  $\alpha 3\beta 2$ ,  $\alpha 3\beta 4$ ,  $\alpha 4\beta 2$ ,  $\alpha 4\beta 4$ ) or rat forebrain ( $\alpha 4\beta 2$ )

Protocol adapted from Xiao *et al. Mol Pharm* 54(2):322-333 (1998).

#### Experimental Procedure and Data Analysis:

A solution of the compound to be tested is prepared as a 1-mg/ml stock in assay buffer or DMSO according to its solubility. A similar stock of a reference compound (positive control) is also prepared. Eleven dilutions (5 x assay concentration) of the test and reference compound [(-)-nicotine] are prepared in assay buffer by serial dilution: 0.05 nM, 0.5 nM, 1.5 nM, 5 nM, 15 nM, 50 nM, 150 nM, 500 nM, 1.5  $\mu$ M, 5  $\mu$ M, 50  $\mu$ M (thus, the corresponding assay concentrations span from 10 pM to 10  $\mu$ M and include semilog points in the range where high-to-moderate affinity ligands compete with radioligand for binding sites).

Radioligand ( $[^3\text{H}]$ epibatidine) is diluted to 2.5 nM (five times the assay concentration) in assay buffer.

Aliquots (50  $\mu$ l) of radioligand are dispensed into the wells of a 96-well plate (see Figure 1) containing 100  $\mu$ l of assay buffer. Then, duplicate 50- $\mu$ l aliquots of the test and reference compound dilutions are added (see Figure 1).

Finally, crude membrane fractions of cells expressing recombinant target (prepared from 10-cm plates by harvesting PBS-rinsed monolayers, resuspending and lysing in chilled, hypotonic 50 mM Tris-HCl, pH 7.4, centrifuging at 20,000 x *g*, decanting the supernatant and storing at -80 degrees centigrade; typically, one 10-cm plate provides sufficient material for 24 wells) are resuspended in 3 ml of chilled assay buffer and homogenized by several passages through a 26 gauge needle, then 50  $\mu$ l are dispensed into each well. (See III for details of crude membrane fraction preparation from rat forebrain for endogenous  $\alpha 4\beta 2$  assays.)

The 250- $\mu$ l reactions are incubated at room temperature and shielded from light (to prevent photolysis of light-sensitive ligands) for 4 hours, then harvested by rapid filtration onto Whatman GF/B glass fiber filters pre-soaked with 0.5% polyethyleneimine using a 96-well Brandel harvester. Four rapid 500- $\mu$ l washes are performed with chilled Standard Binding Buffer to reduce non-specific binding. Filters are placed in 6-ml scintillation tubes and allowed to dry overnight. The next day, 4 ml of EcoScint scintillation cocktail (National Diagnostics) are added to each tube. The tubes are capped, labeled, and counted by liquid scintillation counting.

Raw data (dpm) representing total radioligand binding (*i.e.*, specific + non-specific binding) are plotted as a function of the logarithm of the molar concentration of the competitor (*i.e.*, test or reference compound). Non-linear regression of the normalized (*i.e.*, percent radioligand binding compared to that observed in the absence of test or reference compound) raw data is performed in Prism 4.0 (GraphPad) using the built-in three parameter logistic model describing ligand competition binding to radioligand-labeled sites:

$$y = \text{bottom} + [(\text{top}-\text{bottom})/(1 + 10^{\text{x}-\log\text{IC}_{50}})]$$

where bottom equals the residual radioligand binding measured in the presence of 10 μM reference compound (*i.e.*, non-specific binding) and top equals the total radioligand binding observed in the absence of competitor. The log IC<sub>50</sub> (*i.e.*, the log of the ligand concentration that reduces radioligand binding by 50%) is thus estimated from the data and used to obtain the K<sub>i</sub> by applying the Cheng-Prusoff approximation:

$$K_i = \text{IC}_{50}/(1 + [\text{ligand}]/K_D)$$

where [ligand] equals the assay radioligand concentration and K<sub>D</sub> equals the affinity constant of the radioligand for the target receptor.

**Figure 10.** Radioligand binding isotherms for competition binding assays wherein reference compounds and PDSP investigator-submitted compounds were assayed in parallel at the nicotinic receptors.

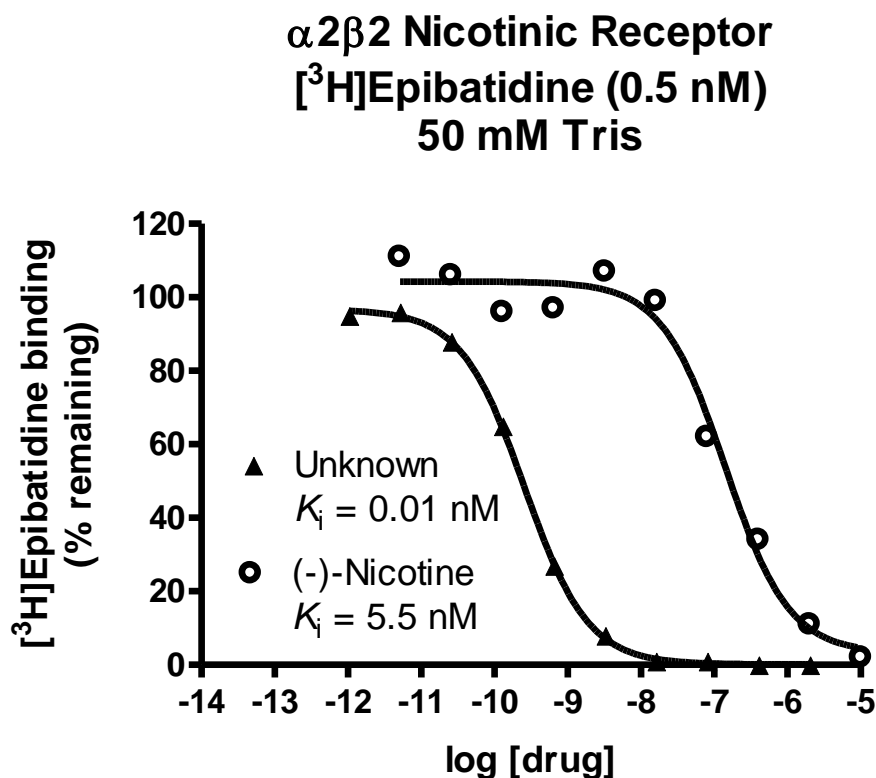

**$\alpha 2\beta 4$  Nicotinic Receptor**  
 **$[^3\text{H}]$ Epibatidine (0.5 nM)**  
**50 mM Tris**

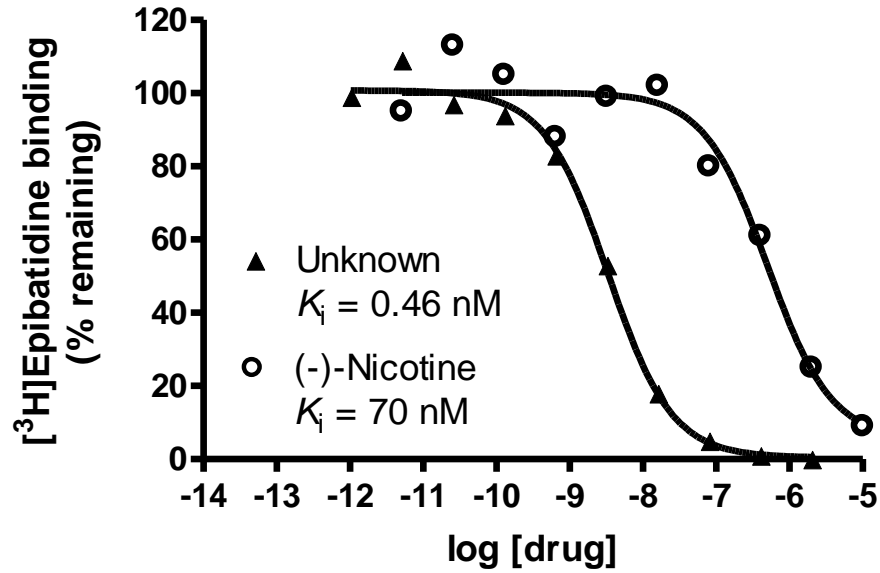

**$\alpha 3\beta 2$  Nicotinic Receptor**  
 **$[^3\text{H}]$ Epibatidine (0.5 nM)**  
**50 mM Tris**

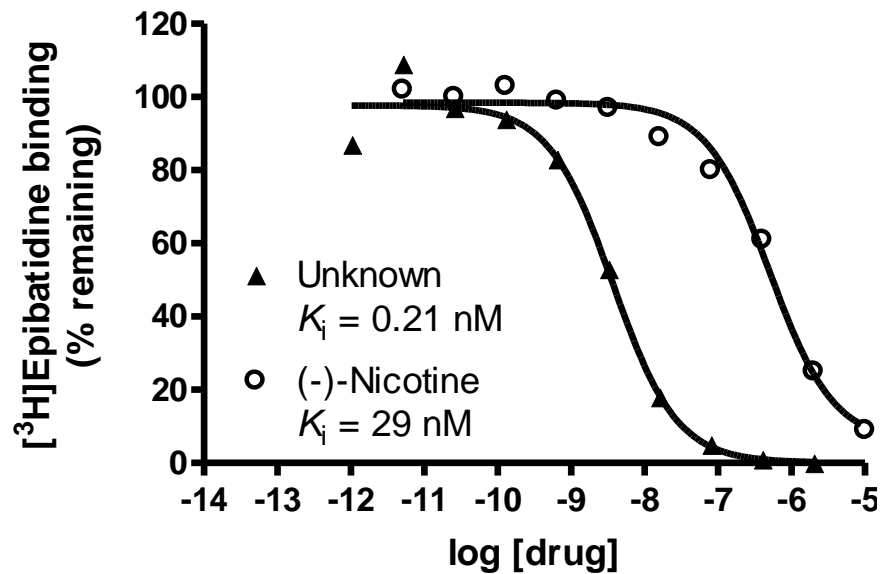

**$\alpha 3\beta 4$  Nicotinic Receptor**  
**[<sup>3</sup>H]Epibatidine (0.5 nM)**  
**50 mM Tris**

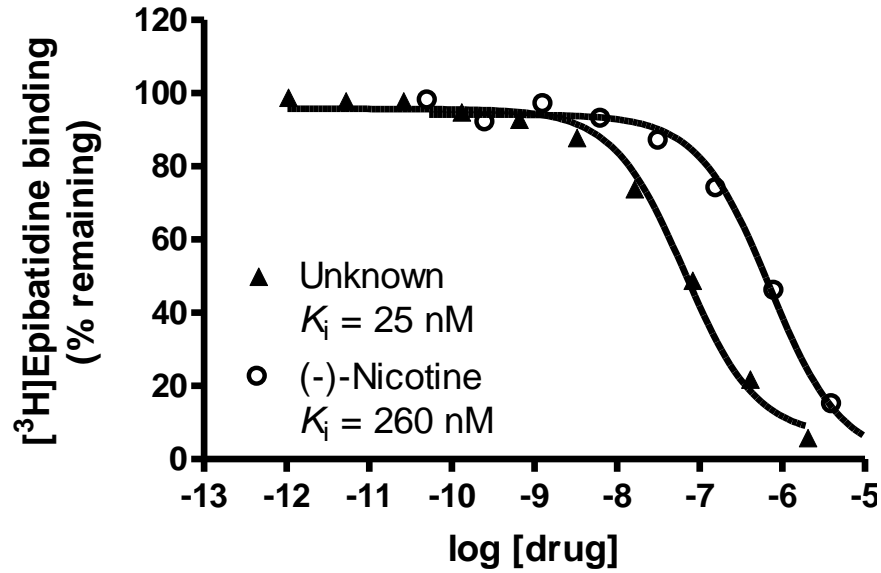

**$\alpha 4\beta 2$  Nicotinic Receptor**  
**[<sup>3</sup>H]Epibatidine (0.5 nM)**  
**50 mM Tris**

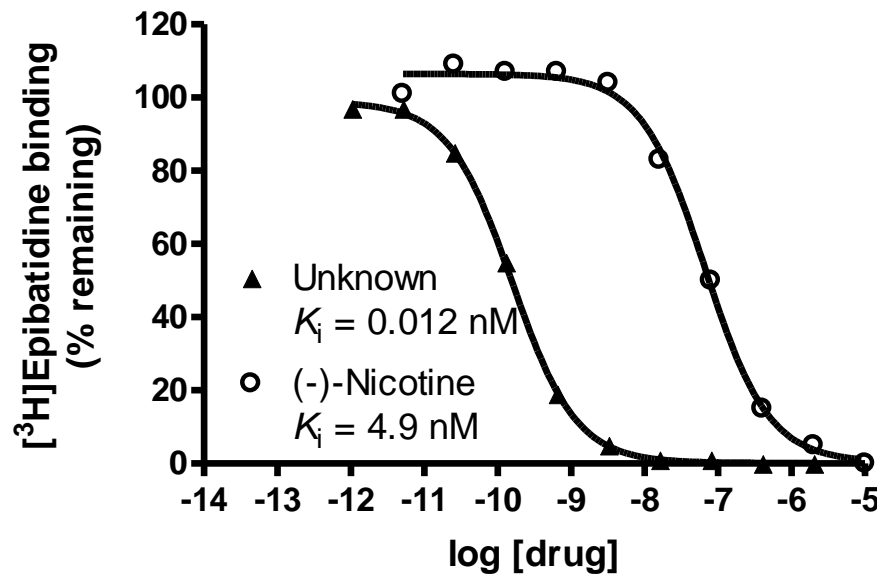

**$\alpha 4\beta 4$  Nicotinic Receptor**  
**[<sup>3</sup>H]Epibatidine (0.5 nM)**  
**50 mM Tris**

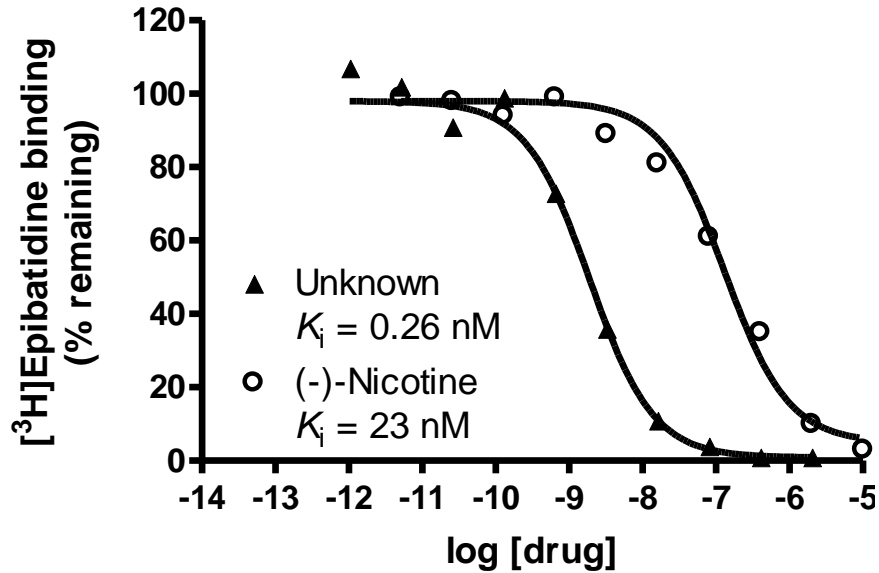

**Endogenous (rat forebrain)**  
 **$\alpha 4\beta 2$  Nicotinic Receptor**  
**[<sup>3</sup>H]Epibatidine (0.5 nM)**  
**50 mM Tris**

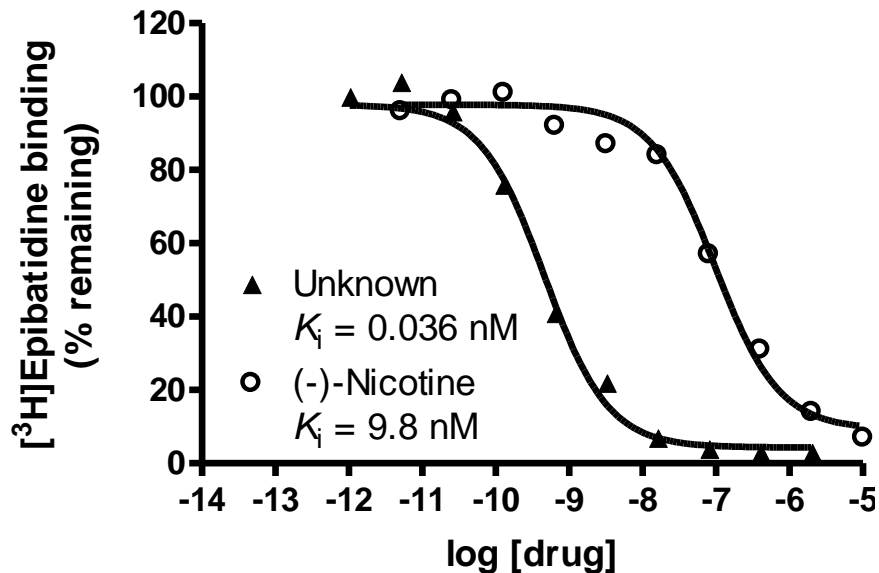

Opioid Receptors: MOR, KOR, DOR

Assay Buffer: Standard Binding Buffer (50 mM Tris-HCl, 10 mM MgCl<sub>2</sub>, 0.1 mM EDTA, pH 7.4)

Membrane Fraction Source: Transiently or stably transfected cell lines (e.g., HEK293, COS, CHO, NIH3T3)

Protocol adapted from Roth *et al. J Biol Chem* 256(19):10017-10023 (1981).

Experimental Procedure and Data Analysis:

A solution of the compound to be tested is prepared as a 1-mg/ml stock in Standard Binding Buffer or DMSO according to its solubility. A similar stock of a reference compound (positive control) is also prepared. Eleven dilutions (5 x assay concentration) of the test and reference (see Table 6) compounds are prepared in Standard Binding Buffer by serial dilution: 0.05 nM, 0.5 nM, 1.5 nM, 5 nM, 15 nM, 50 nM, 150 nM, 500 nM, 1.5 μM, 5 μM, 50 μM (thus, the corresponding assay concentrations span from 10 pM to 10 μM and include semilog points in the range where high-to-moderate affinity ligands compete with radioligand for binding sites).

Radioligand (see Table 6) is diluted to five times the assay concentration (see Table 6) in Standard Binding Buffer. Typically, the assay concentration of radioligand is a value between one half the  $K_D$  and the  $K_D$  of a particular radioligand at its target.

Aliquots (50 μl) of radioligand are dispensed into the wells of a 96-well plate (see Figure 1) containing 100 μl of Standard Binding Buffer. Then, duplicate 50-μl aliquots of the test and reference compound dilutions are added (see Figure 1).

Finally, crude membrane fractions of cells expressing recombinant target (prepared from 10-cm plates by harvesting PBS-rinsed monolayers, resuspending and lysing in chilled, hypotonic 50 mM Tris-HCl, pH 7.4, centrifuging at 20,000 x g, decanting the supernatant and storing at -80 degrees centigrade; typically, one 10-cm plate provides sufficient material for 24 wells) are resuspended in 3 ml of chilled Standard Binding Buffer and homogenized by several passages through a 26 gauge needle, then 50 μl are dispensed into each well.

The 250-μl reactions are incubated at room temperature and shielded from light (to prevent photolysis of light-sensitive ligands) for 1.5 hours, then harvested by rapid filtration onto Whatman GF/B glass fiber filters pre-soaked with 0.3% polyethyleneimine using a 96-well Brandel harvester. Four rapid 500-μl washes are performed with chilled Standard Binding Buffer to reduce non-specific binding. Filters are placed in 6-ml scintillation tubes and allowed to dry overnight.

The next day, 4 ml of EcoScint scintillation cocktail (National Diagnostics) are added to each tube. The tubes are capped, labeled, and counted by liquid scintillation counting. For higher throughput assays, bound radioactivity is harvested onto 0.3% polyethyleneimine-treated, 96-well filter mats using a 96-well Filtermate harvester. The filter mats are dried, then scintillant is melted onto the filters and the radioactivity retained on the filters is counted in a Microbeta scintillation counter. Currently, nearly all of our radioligand binding assays have been adapted to this higher throughput approach.

Raw data (dpm) representing total radioligand binding (*i.e.*, specific + non-specific binding) are plotted as a function of the logarithm of the molar concentration of the competitor (*i.e.*, test or reference compound). Non-linear regression of the normalized (*i.e.*, percent radioligand binding compared to that observed in the absence of test or reference compound) raw data is performed in Prism 4.0 using the built-in three parameter logistic model describing ligand competition binding to radioligand-labeled sites:

$$y = \text{bottom} + [(\text{top}-\text{bottom})/(1 + 10^{\text{x}-\log\text{IC}_{50}})]$$

where bottom equals the residual radioligand binding measured in the presence of 10 μM reference compound (*i.e.*, non-specific binding) and top equals the total radioligand binding observed in the absence of competitor. The log IC<sub>50</sub> (*i.e.*, the log of the ligand concentration that reduces radioligand binding by 50%) is thus estimated from the data and used to obtain the K<sub>i</sub> by applying the Cheng-Prusoff approximation:

$$K_i = \text{IC}_{50}/(1 + [\text{ligand}]/K_D)$$

where [ligand] equals the assay radioligand concentration and K<sub>D</sub> equals the affinity constant of the radioligand for the target receptor.

| Receptor | Radioligand (Assay Conc.)        | Reference Compound |
|----------|----------------------------------|--------------------|
| MOR      | [ <sup>3</sup> H]DAMGO (0.3 nM)  | DAMGO              |
| KOR      | [ <sup>3</sup> H]U69593 (0.3 nM) | Salvinorin A       |
| DOR      | [ <sup>3</sup> H]DADLE (0.2 nM)  | Naltrindole        |

**Table 7. Opioid receptor radioligands, radioligand assay concentrations, and reference compounds.**



**Figure 11.** Radioligand binding isotherms for competition binding assays wherein reference compounds and PDSP investigator-submitted compounds were assayed in parallel at the opioid receptors.

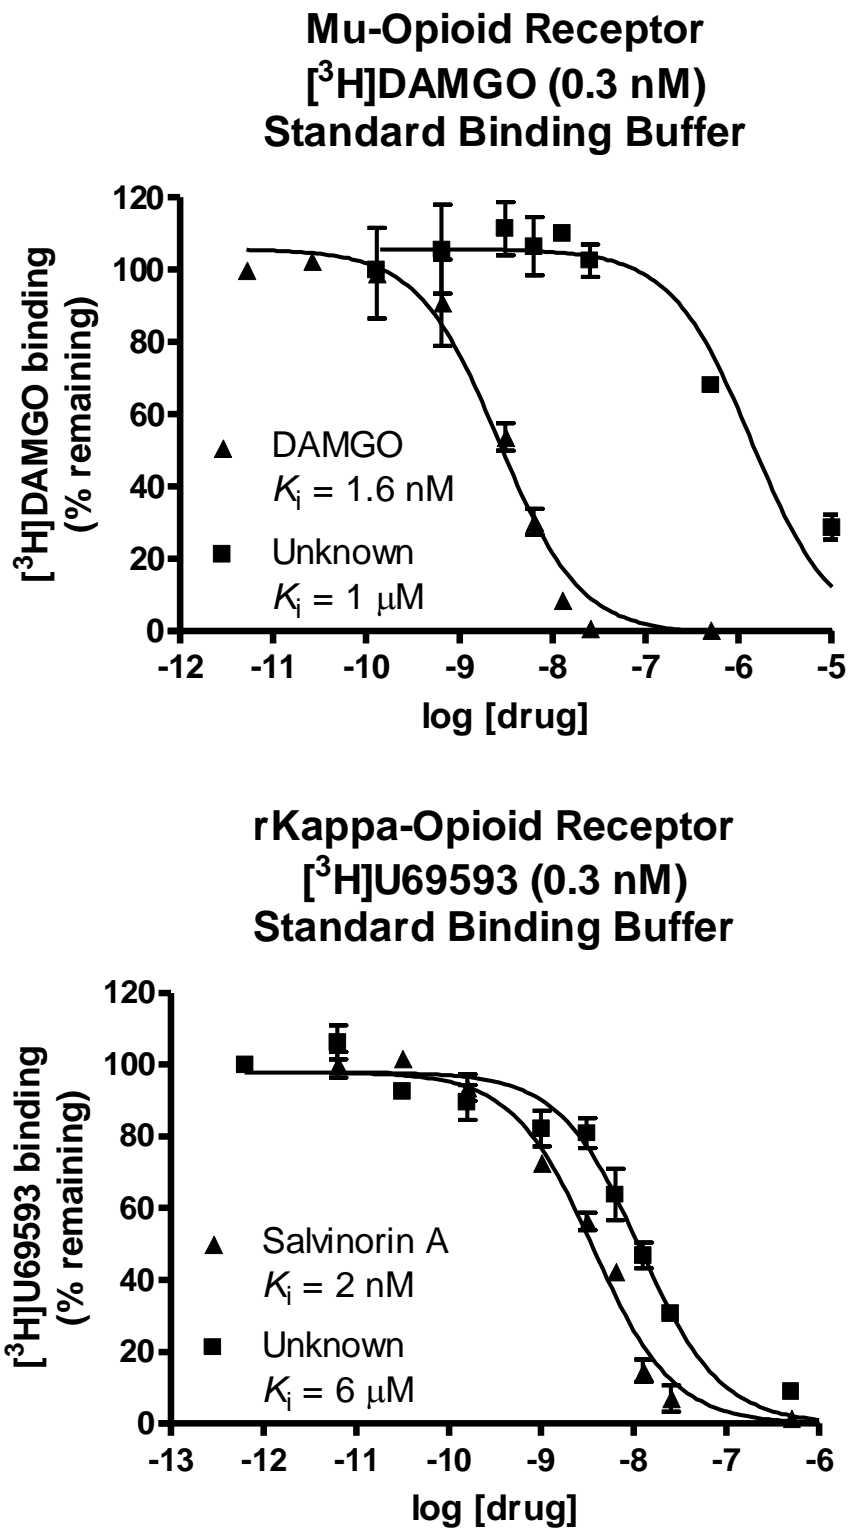

**hDelta-Opioid Receptor  
[<sup>3</sup>H]DADLE (0.2 nM)  
Standard Binding Buffer**

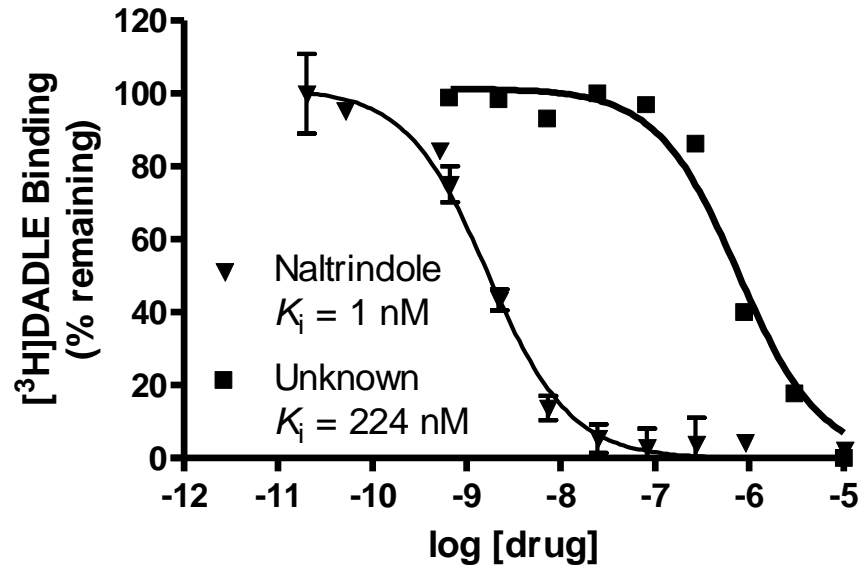

Sigma Receptors: Sigma1, Sigma2

Assay Buffer: Sigma Binding Buffer (50 mM Tris-HCl, **pH 8.0**)

Membrane Fraction Source: Rat brain homogenate (Sigma1), PC12 cells (Sigma2)

Protocol adapted from Kovacs and Larson. *Eur J Pharmacol* 350(1):47-52 (1998).

Experimental Procedure and Data Analysis:

A solution of the compound to be tested is prepared as a 1-mg/ml stock in Sigma Binding Buffer or DMSO according to its solubility. A similar stock of a reference compound (positive control) is also prepared. Eleven dilutions (5 x assay concentration) of the test and reference (see Table 7) compounds are prepared in Sigma Binding Buffer by serial dilution: 0.05 nM, 0.5 nM, 1.5 nM, 5 nM, 15 nM, 50 nM, 150 nM, 500 nM, 1.5  $\mu$ M, 5  $\mu$ M, 50  $\mu$ M (thus, the corresponding assay concentrations span from 10 pM to 10  $\mu$ M and include semilog points in the range where high-to-moderate affinity ligands compete with radioligand for binding sites).

Radioligand (see Table 7) is diluted to five times the assay concentration (see Table 7) in Sigma Binding Buffer. Typically, the assay concentration of radioligand is a value between one half the  $K_D$  and the  $K_D$  of a particular radioligand at its target.

Aliquots (50  $\mu$ l) of radioligand are dispensed into the wells of a 96-well plate (see Figure 1) containing 100  $\mu$ l of Sigma Binding Buffer. Then, duplicate 50- $\mu$ l aliquots of the test and reference compound dilutions are added (see Figure 1).

Finally, crude membrane fractions prepared from rat brain homogenate for Sigma1 receptors (see III for details) or, for Sigma2 receptors, from PC12 cells in 10-cm plates (by harvesting PBS-rinsed monolayers, resuspending and lysing in chilled, hypotonic 50 mM Tris-HCl, pH 7.4, centrifuging at 20,000 x g, decanting the supernatant and storing at -80 degrees centigrade; typically, one 10-cm plate provides sufficient material for 24 wells) are resuspended in 3 ml of chilled 50 mM Tris-HCl, pH 8.0 and homogenized by several passages through a 26 gauge needle, then 50  $\mu$ l are dispensed into each well.

The 250- $\mu$ l reactions are incubated at 37 degrees (for Sigma1 receptors) or room temperature (for Sigma2 receptors) and shielded from light (to prevent photolysis of light-sensitive ligands) for 2.5 hours (for Sigma 1 receptors) or 2 hours (for Sigma2 receptors), then harvested by rapid filtration onto Whatman GF/B glass fiber filters pre-soaked with 0.3% polyethyleneimine using a 96-well Brandel

harvester. Four rapid 500-µl washes are performed with chilled 10 mM Tris-HCl, pH 8.0 to reduce non-specific binding. Filters are placed in 6-ml scintillation tubes and allowed to dry overnight. The next day, 4 ml of EcoScint scintillation cocktail (National Diagnostics) are added to each tube. The tubes are capped, labeled, and counted by liquid scintillation counting. For higher throughput assays, bound radioactivity is harvested onto 0.3% polyethyleneimine-treated, 96-well filter mats using a 96-well Filtermate harvester. The filter mats are dried, then scintillant is melted onto the filters and the radioactivity retained on the filters is counted in a Microbeta scintillation counter. Currently, nearly all of our radioligand binding assays have been adapted to this higher throughput approach.

Raw data (dpm) representing total radioligand binding (*i.e.*, specific + non-specific binding) are plotted as a function of the logarithm of the molar concentration of the competitor (*i.e.*, test or reference compound). Non-linear regression of the normalized (*i.e.*, percent radioligand binding compared to that observed in the absence of test or reference compound) raw data is performed in Prism 4.0 using the built-in three parameter logistic model describing ligand competition binding to radioligand-labeled sites:

$$y = \text{bottom} + [(\text{top}-\text{bottom})/(1 + 10^{\text{x}-\log\text{IC}_{50}})]$$

where bottom equals the residual radioligand binding measured in the presence of 10 µM reference compound (*i.e.*, non-specific binding) and top equals the total radioligand binding observed in the absence of competitor. The log IC<sub>50</sub> (*i.e.*, the log of the ligand concentration that reduces radioligand binding by 50%) is thus estimated from the data and used to obtain the *K<sub>i</sub>* by applying the Cheng-Prusoff approximation:

$$K_i = \text{IC}_{50}/(1 + [\text{ligand}]/K_D)$$

where [ligand] equals the assay radioligand concentration and *K<sub>D</sub>* equals the affinity constant of the radioligand for the target receptor.

| Receptor      | Radioligand (Assay Conc.)           | Reference Compound |
|---------------|-------------------------------------|--------------------|
| <b>Sigma1</b> | [ <sup>3</sup> H]Pentazocine (3 nM) | Haloperidol        |
| <b>Sigma2</b> | [ <sup>3</sup> H]DTG (3 nM)         | Haloperidol        |

**Table 8. Sigma receptor radioligands, radioligand assay concentrations, and reference compounds.**

**Figure 12.** Radioligand binding isotherms for competition binding assays wherein reference compounds and PDSP investigator-submitted compounds were assayed in parallel at the Sigma receptors.

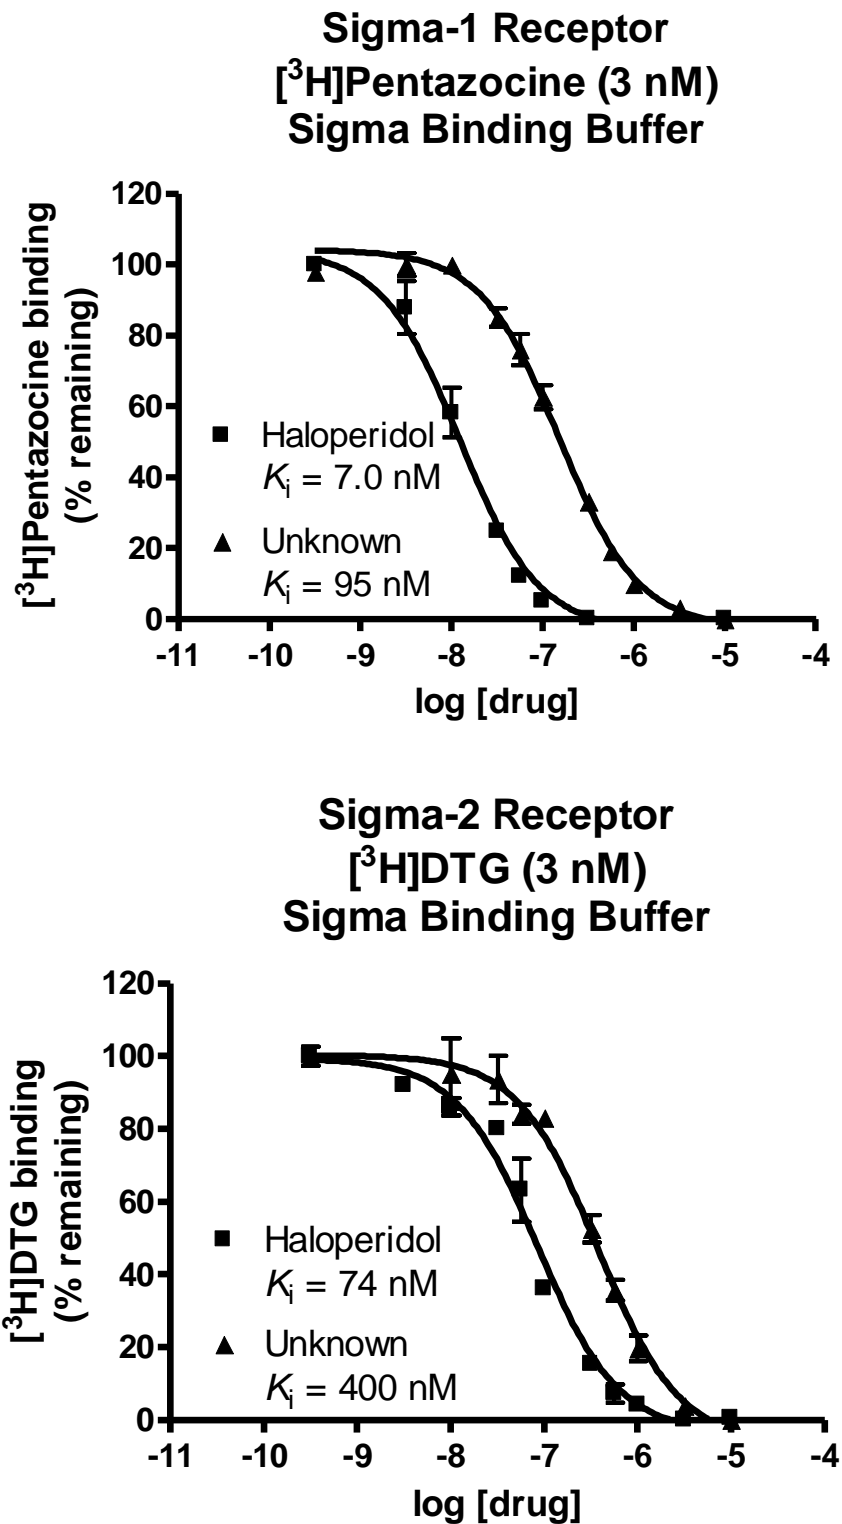

Histamine Receptors: H<sub>1</sub>, H<sub>2</sub>, H<sub>3</sub>, H<sub>4</sub>

Assay Buffer: Histamine Binding Buffer (50 mM Tris-HCl, 0.5 mM EDTA, pH 7.4)

Membrane Fraction Source: Transiently or stably transfected cell lines (e.g., HEK293, COS, CHO, NIH3T3)

Protocol adapted from Moguevsky *et al.* *Eur J Pharmacol* 224:489-495 (1994).

Experimental Procedure and Data Analysis:

A solution of the compound to be tested is prepared as a 1-mg/ml stock in Histamine Binding Buffer or DMSO according to its solubility. A similar stock of a reference compound (positive control) is also prepared. Eleven dilutions (5 x assay concentration) of the test and reference (see Table 8) compounds are prepared in Histamine Binding Buffer by serial dilution: 0.05 nM, 0.5 nM, 1.5 nM, 5 nM, 15 nM, 50 nM, 150 nM, 500 nM, 1.5 μM, 5 μM, 50 μM (thus, the corresponding assay concentrations span from 10 pM to 10 μM and include semilog points in the range where high-to-moderate affinity ligands compete with radioligand for binding sites).

Radioligand (see Table 8) is diluted to five times the assay concentration (see Table 8) in Histamine Binding Buffer. Typically, the assay concentration of radioligand is a value between one half the  $K_D$  and the  $K_D$  of a particular radioligand at its target.

Aliquots (50 μl) of radioligand are dispensed into the wells of a 96-well plate (see Figure 1) containing 100 μl of Histamine Binding Buffer. Then, duplicate 50-μl aliquots of the test and reference compound dilutions are added (see Figure 1).

Finally, crude membrane fractions of cells expressing recombinant target (prepared from 10-cm plates by harvesting PBS-rinsed monolayers, resuspending and lysing in chilled, hypotonic 50 mM Tris-HCl, pH 7.4, centrifuging at 20,000 x *g*, decanting the supernatant and storing at -80 degrees centigrade; typically, one 10-cm plate provides sufficient material for 24 wells) are resuspended in 3 ml of chilled Histamine Binding Buffer and homogenized by several passages through a 26 gauge needle, then 50 μl are dispensed into each well.

The 250-μl reactions are incubated at room temperature and shielded from light (to prevent photolysis of light-sensitive ligands) for 1.5 hours, then harvested by rapid filtration onto Whatman GF/B glass fiber filters pre-soaked with 0.3% polyethyleneimine using a 96-well Brandel harvester. Four rapid 500-μl washes are performed with chilled Standard Binding Buffer to reduce non-specific binding. Filters are placed in 6-ml scintillation tubes and allowed to dry overnight. The next day, 4 ml of EcoScint scintillation cocktail (National Diagnostics) are

added to each tube. The tubes are capped, labeled, and counted by liquid scintillation counting. For higher throughput assays, bound radioactivity is harvested onto 0.3% polyethyleneimine-treated, 96-well filter mats using a 96-well Filtermate harvester. The filter mats are dried, then scintillant is melted onto the filters and the radioactivity retained on the filters is counted in a Microbeta scintillation counter. Currently, nearly all of our radioligand binding assays have been adapted to this higher throughput approach.

Raw data (dpm) representing total radioligand binding (*i.e.*, specific + non-specific binding) are plotted as a function of the logarithm of the molar concentration of the competitor (*i.e.*, test or reference compound). Non-linear regression of the normalized (*i.e.*, percent radioligand binding compared to that observed in the absence of test or reference compound) raw data is performed in Prism 4.0 using the built-in three parameter logistic model describing ligand competition binding to radioligand-labeled sites:

$$y = \text{bottom} + [(\text{top}-\text{bottom})/(1 + 10^{\text{x}-\log\text{IC}_{50}})]$$

where bottom equals the residual radioligand binding measured in the presence of 10 μM reference compound (*i.e.*, non-specific binding) and top equals the total radioligand binding observed in the absence of competitor. The log IC<sub>50</sub> (*i.e.*, the log of the ligand concentration that reduces radioligand binding by 50%) is thus estimated from the data and used to obtain the K<sub>i</sub> by applying the Cheng-Prusoff approximation:

$$K_i = \text{IC}_{50}/(1 + [\text{ligand}]/K_D)$$

where [ligand] equals the assay radioligand concentration and K<sub>D</sub> equals the affinity constant of the radioligand for the target receptor.

| Receptor       | Radioligand (Assay Conc.)                   | Reference Compound |
|----------------|---------------------------------------------|--------------------|
| H <sub>1</sub> | [ <sup>3</sup> H]Pyrilamine (0.9 nM)        | Chlorpheniramine   |
| H <sub>2</sub> | [ <sup>3</sup> H]Tiotidine (3 nM)           | Cimetidine         |
| H <sub>3</sub> | [ <sup>3</sup> H]α-Methylhistamine (0.4 nM) | Histamine          |
| H <sub>4</sub> | [ <sup>3</sup> H]Histamine (5 nM)           | Clozapine          |

**Table 9. Histamine receptor radioligands, radioligand assay concentrations, and reference compounds.**

**Figure 13.** Radioligand binding isotherms for competition binding assays wherein reference compounds and PDSP investigator-submitted compounds were assayed in parallel at the histamine receptors.

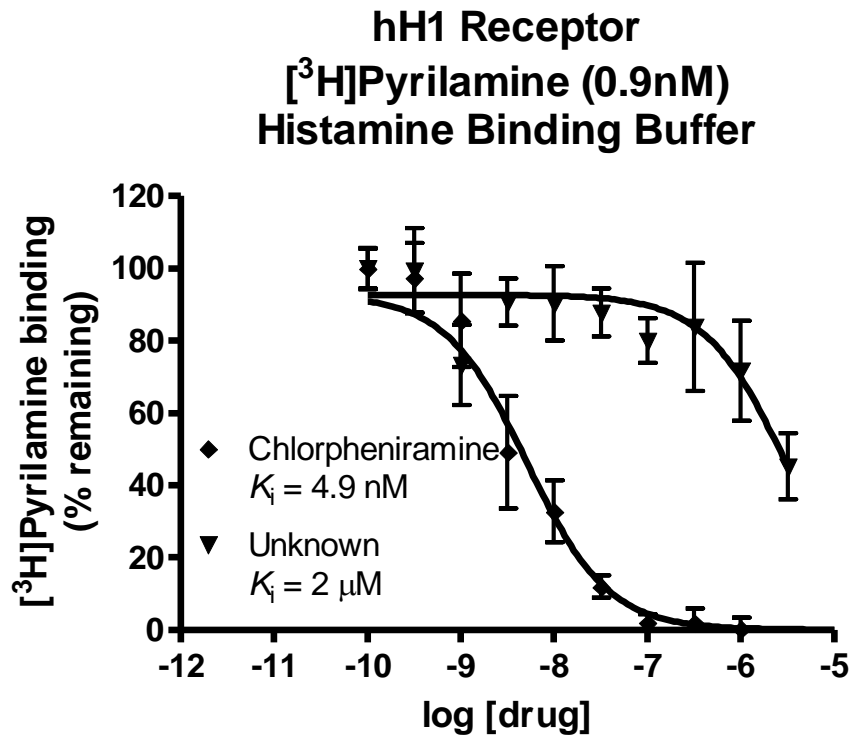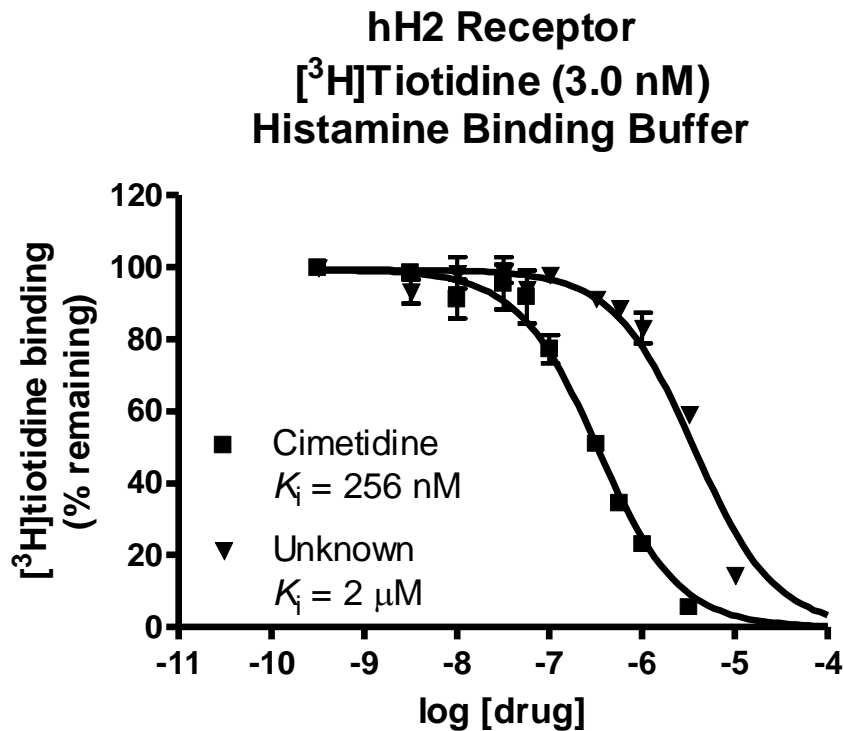



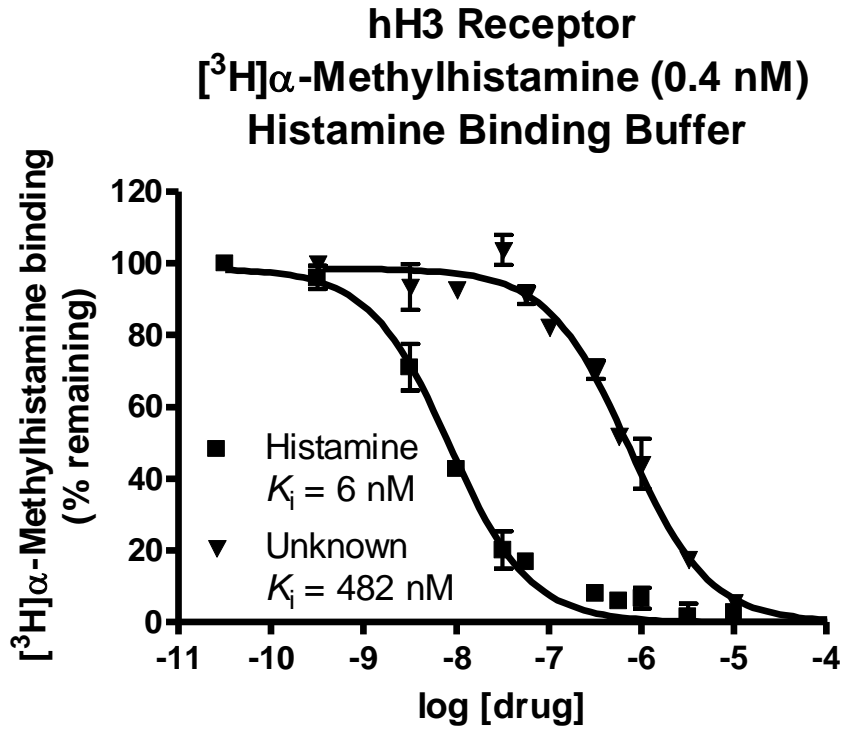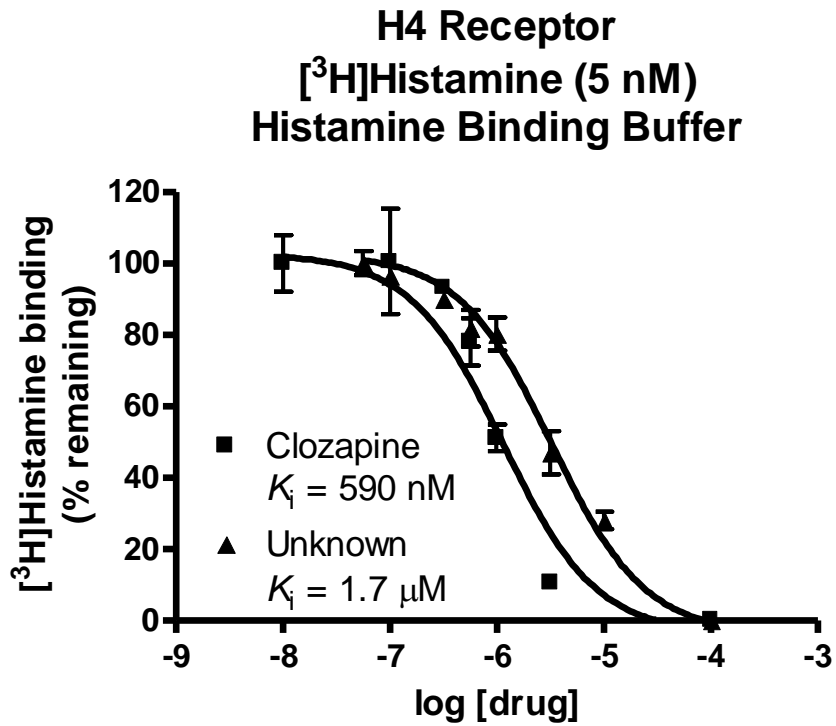

### Vasopressin Receptors: V1, V2, V3

Assay Buffer: Vasopressin Binding Buffer (100 mM NaCl, 10 mM MgCl<sub>2</sub>, 0.1 mg/ml bacitracin, 1 mg/ml BSA, 20 mM Tris-HCl, pH 7.4)

Membrane Fraction Source: Transiently or stably transfected cell lines (e.g., HEK293, COS, CHO, NIH3T3)

Protocol adapted from Roth and Spitzer. *Am J Physiol* 252(5 Pt 1):E699-702 (1987).

### Experimental Procedure and Data Analysis:

A solution of the compound to be tested is prepared as a 1-mg/ml stock in Vasopressin Binding Buffer or DMSO according to its solubility. A similar stock of a reference compound (positive control) is also prepared. Eleven dilutions (5 x assay concentration) of the test and reference compound (vasopressin) are prepared in Vasopressin Binding Buffer by serial dilution: 0.05 nM, 0.5 nM, 1.5 nM, 5 nM, 15 nM, 50 nM, 150 nM, 500 nM, 1.5 μM, 5 μM, 50 μM (thus, the corresponding assay concentrations span from 10 pM to 10 μM and include semilog points in the range where high-to-moderate affinity ligands compete with radioligand for binding sites).

Radioligand ([<sup>3</sup>H]vasopressin) is diluted to 5 nM (five times the assay concentration) in Vasopressin Binding Buffer.

Aliquots (50 μl) of radioligand are dispensed into the wells of a 96-well plate (see Figure 1) containing 100 μl of Vasopressin Binding Buffer. Then, duplicate 50-μl aliquots of the test and reference compound dilutions are added (see Figure 1).

Finally, crude membrane fractions of cells expressing recombinant target (prepared from 10-cm plates by harvesting PBS-rinsed monolayers, resuspending and lysing in chilled, hypotonic 50 mM Tris-HCl, pH 7.4, centrifuging at 20,000 x g, decanting the supernatant and storing at -80 degrees centigrade; typically, one 10-cm plate provides sufficient material for 24 wells) are resuspended in 3 ml of chilled Vasopressin Binding Buffer and homogenized by several passages through a 26 guage needle, then 50 μl are dispensed into each well.

The 250-μl reactions are incubated at room temperature and shielded from light (to prevent photolysis of light-sensitive ligands) for 1.5 hours, then harvested by rapid filtration onto Whatman GF/B glass fiber filters pre-soaked with 0.3% polyethyleneimine using a 96-well Brandel harvester. Four rapid 500-μl washes are performed with chilled Standard Binding Buffer to reduce non-specific binding. Filters are placed in 6-ml scintillation tubes and allowed to dry overnight. The next day, 4 ml of EcoScint scintillation cocktail (National Diagnostics) are

added to each tube. The tubes are capped, labeled, and counted by liquid scintillation counting. For higher throughput assays, bound radioactivity is harvested onto 0.3% polyethyleneimine-treated, 96-well filter mats using a 96-well Filtermate harvester. The filter mats are dried, then scintillant is melted onto the filters and the radioactivity retained on the filters is counted in a Microbeta scintillation counter. Currently, nearly all of our radioligand binding assays have been adapted to this higher throughput approach.

Raw data (dpm) representing total radioligand binding (*i.e.*, specific + non-specific binding) are plotted as a function of the logarithm of the molar concentration of the competitor (*i.e.*, test or reference compound). Non-linear regression of the normalized (*i.e.*, percent radioligand binding compared to that observed in the absence of test or reference compound) raw data is performed in Prism 4.0 using the built-in three parameter logistic model describing ligand competition binding to radioligand-labeled sites:

$$y = \text{bottom} + [(\text{top} - \text{bottom}) / (1 + 10^{\text{x} - \log \text{IC}_{50}})]$$

where bottom equals the residual radioligand binding measured in the presence of 10  $\mu\text{M}$  reference compound (*i.e.*, non-specific binding) and top equals the total radioligand binding observed in the absence of competitor. The  $\log \text{IC}_{50}$  (*i.e.*, the log of the ligand concentration that reduces radioligand binding by 50%) is thus estimated from the data and used to obtain the  $K_i$  by applying the Cheng-Prusoff approximation:

$$K_i = \text{IC}_{50} / (1 + [\text{ligand}] / K_D)$$

where [ligand] equals the assay radioligand concentration and  $K_D$  equals the affinity constant of the radioligand for the target receptor.

**Figure 14.** Radioligand binding isotherms for competition binding assays wherein reference compounds and PDSP investigator-submitted compounds were assayed in parallel at the vasopressin receptors.

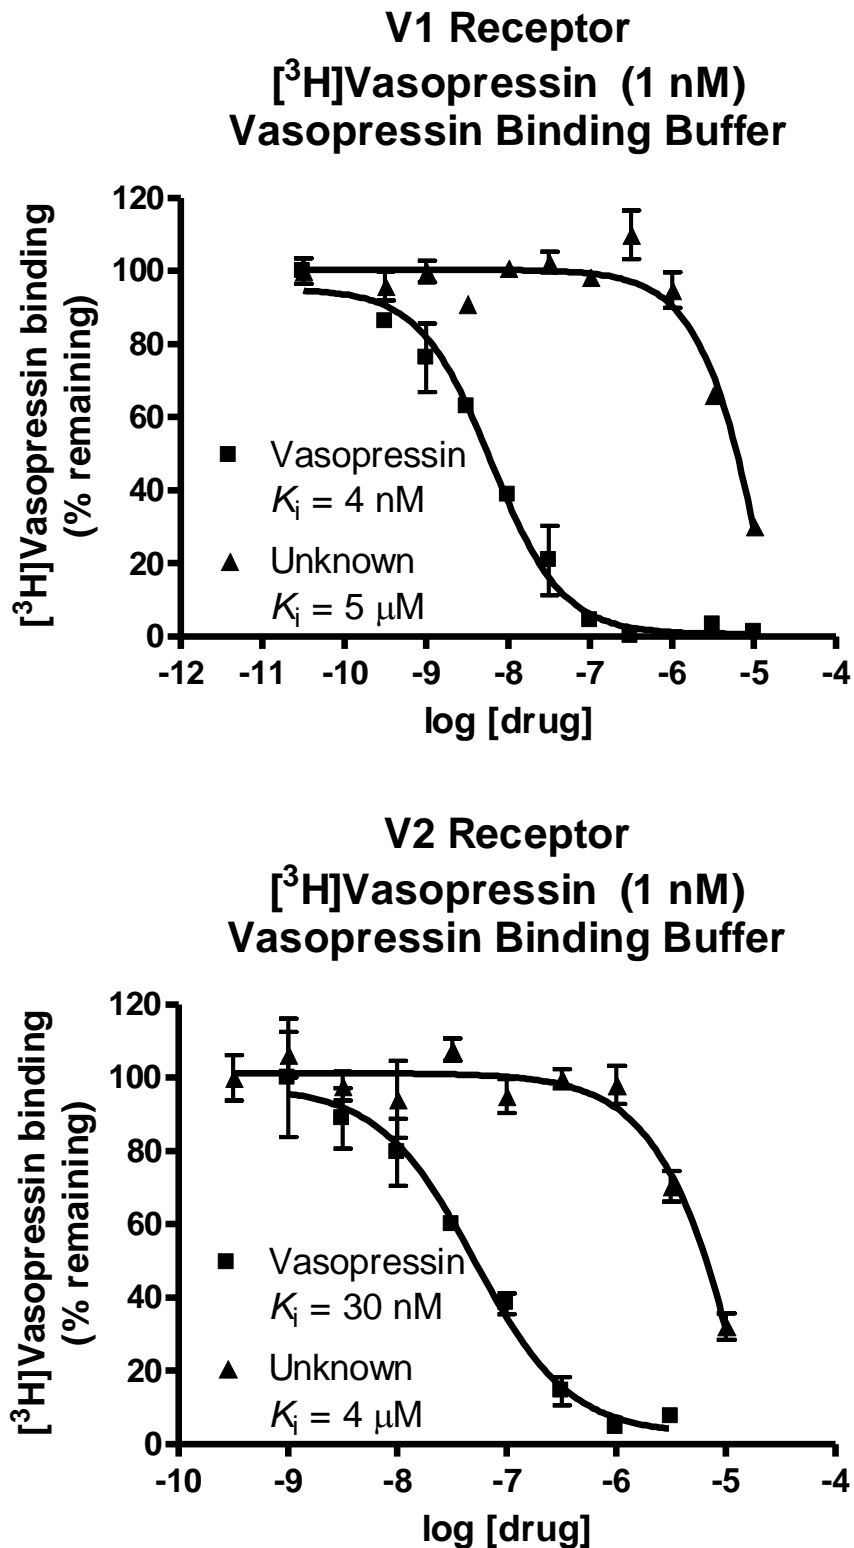

**V3 Receptor**  
**[<sup>3</sup>H]Vasopressin (1 nM)**  
**Vasopressin Binding Buffer**

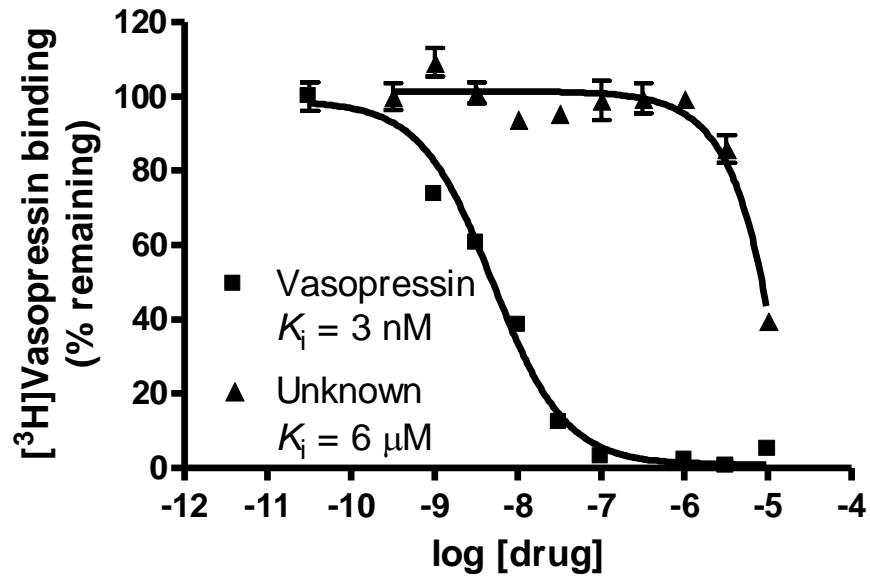

## Neurotensin Receptors: NT1, NT2

Assay Buffer: 50 mM Tris-HCl, 0.2% BSA

Membrane Fraction Source: Transiently or stably transfected cell lines (e.g., HEK293, COS, CHO, NIH3T3)

Protocol adapted from Pettibone *et al. J Pharmacol Exp Ther.* 300(1):305-313 (2002).

### Experimental Procedure and Data Analysis:

A solution of the compound to be tested is prepared as a 1-mg/ml stock in 50 mM Tris-HCl, 0.2% BSA or DMSO according to its solubility. A similar stock of a reference compound (neurotensin, positive control) is also prepared. Eleven dilutions (5 x assay concentration) of the test and reference compound (neurotensin) are prepared in 50 mM Tris-HCl, 0.2% BSA by serial dilution: 0.05 nM, 0.5 nM, 1.5 nM, 5 nM, 15 nM, 50 nM, 150 nM, 500 nM, 1.5  $\mu$ M, 5  $\mu$ M, 50  $\mu$ M (thus, the corresponding assay concentrations span from 10 pM to 10  $\mu$ M and include semilog points in the range where high-to-moderate affinity ligands compete with radioligand for binding sites).

Radioligand ( $[^3\text{H}]$ neurotensin) is diluted to 10 nM (five times the assay concentration) in 50 mM Tris-HCl, 0.2% BSA.

Aliquots (50  $\mu$ l) of radioligand are dispensed into the wells of a 96-well plate (see Figure 1) containing 100  $\mu$ l of 50 mM Tris-HCl, 0.2% BSA. Then, duplicate 50- $\mu$ l aliquots of the test and reference compound dilutions are added (see Figure 1).

Finally, crude membrane fractions of cells expressing recombinant target (prepared from 10-cm plates by harvesting PBS-rinsed monolayers, resuspending and lysing in chilled, hypotonic 50 mM Tris-HCl, pH 7.4, centrifuging at 20,000 x g, decanting the supernatant and storing at -80 degrees centigrade; typically, one 10-cm plate provides sufficient material for 24 wells) are resuspended in 3 ml of chilled 50 mM Tris-HCl, 0.2% BSA and homogenized by several passages through a 26 guage needle, then 50  $\mu$ l are dispensed into each well.

The 250- $\mu$ l reactions are incubated at room temperature and shielded from light (to prevent photolysis of light-sensitive ligands) for 1.5 hours, then harvested by rapid filtration onto Whatman GF/B glass fiber filters pre-soaked with 0.3% polyethyleneimine using a 96-well Brandel harvester. Four rapid 500- $\mu$ l washes are performed with chilled Standard Binding Buffer to reduce non-specific binding. Filters are placed in 6-ml scintillation tubes and allowed to dry overnight. The next day, 4 ml of EcoScint scintillation cocktail (National Diagnostics) are added to each tube. The tubes are capped, labeled, and counted by liquid

scintillation counting. For higher throughput assays, bound radioactivity is harvested onto 0.3% polyethyleneimine-treated, 96-well filter mats using a 96-well Filtermate harvester. The filter mats are dried, then scintillant is melted onto the filters and the radioactivity retained on the filters is counted in a Microbeta scintillation counter. Currently, nearly all of our radioligand binding assays have been adapted to this higher throughput approach.

Raw data (dpm) representing total radioligand binding (*i.e.*, specific + non-specific binding) are plotted as a function of the logarithm of the molar concentration of the competitor (*i.e.*, test or reference compound). Non-linear regression of the normalized (*i.e.*, percent radioligand binding compared to that observed in the absence of test or reference compound) raw data is performed in Prism 4.0 using the built-in three parameter logistic model describing ligand competition binding to radioligand-labeled sites:

$$y = \text{bottom} + [(\text{top} - \text{bottom}) / (1 + 10^{x - \log \text{IC}_{50}})]$$

where bottom equals the residual radioligand binding measured in the presence of 10  $\mu\text{M}$  reference compound (*i.e.*, non-specific binding) and top equals the total radioligand binding observed in the absence of competitor. The  $\log \text{IC}_{50}$  (*i.e.*, the log of the ligand concentration that reduces radioligand binding by 50%) is thus estimated from the data and used to obtain the  $K_i$  by applying the Cheng-Prusoff approximation:

$$K_i = \text{IC}_{50} / (1 + [\text{ligand}] / K_D)$$

where [ligand] equals the assay radioligand concentration and  $K_D$  equals the affinity constant of the radioligand for the target receptor.

**Figure 15.** Radioligand binding isotherms for competition binding assays wherein reference compounds and PDSP investigator-submitted compounds were assayed in parallel at the neurotensin NT1 receptor.

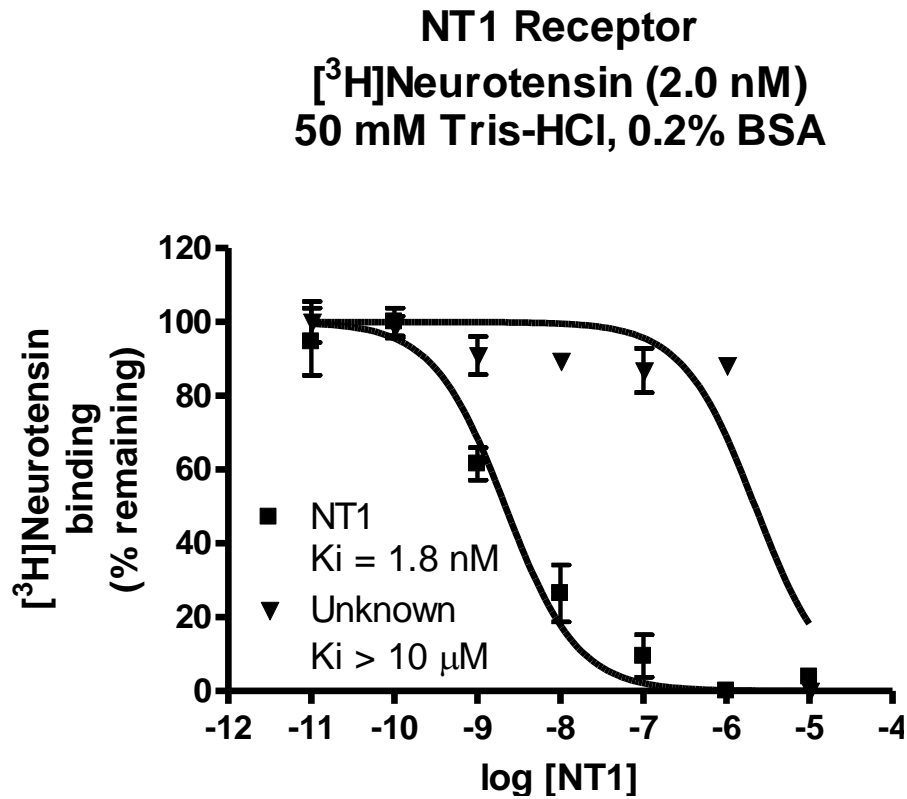



## VMAT2

Assay Buffer: 50 mM HEPES, 300 mM sucrose, **pH 8.0**

Membrane Fraction Source: Transiently or stably transfected cell lines (e.g., HEK293, COS, CHO, NIH3T3)

Protocol adapted from Zucker *et al.* 69(2001):2311-2317 (2001).

### Experimental Procedure and Data Analysis:

A solution of the compound to be tested is prepared as a 1-mg/ml stock in 50 mM HEPES, 300 mM sucrose, **pH 8.0** or DMSO according to its solubility. A similar stock of a reference compound (reserpine, positive control) is also prepared. Eleven dilutions (5 x assay concentration) of the test and reference compound (neurotensin) are prepared in 50 mM HEPES, 300 mM sucrose, **pH 8.0** by serial dilution: 0.05 nM, 0.5 nM, 1.5 nM, 5 nM, 15 nM, 50 nM, 150 nM, 500 nM, 1.5  $\mu$ M, 5  $\mu$ M, 50  $\mu$ M (thus, the corresponding assay concentrations span from 10 pM to 10  $\mu$ M and include semilog points in the range where high-to-moderate affinity ligands compete with radioligand for binding sites).

Radioligand ( $[^3\text{H}]$ tetrabenzazine) is diluted to 7.5 nM (five times the assay concentration) in 50 mM HEPES, 300 mM sucrose, **pH 8.0**.

Aliquots (50  $\mu$ l) of radioligand are dispensed into the wells of a 96-well plate (see Figure 1) containing 100  $\mu$ l of 50 mM HEPES, 300 mM sucrose, **pH 8.0**. Then, duplicate 50- $\mu$ l aliquots of the test and reference compound dilutions are added (see Figure 1).

Finally, crude membrane fractions of cells expressing recombinant target (prepared from 10-cm plates by harvesting PBS-rinsed monolayers, resuspending and lysing in chilled, hypotonic 50 mM Tris-HCl, pH 7.4, centrifuging at 20,000 x g, decanting the supernatant and storing at -80 degrees centigrade; typically, one 10-cm plate provides sufficient material for 24 wells) are resuspended in 3 ml of chilled 50 mM Tris-HCl, 0.2% BSA and homogenized by several passages through a 26 guage needle, then 50  $\mu$ l are dispensed into each well.

The 250- $\mu$ l reactions are incubated at room temperature and shielded from light (to prevent photolysis of light-sensitive ligands) for 1.5 hours, then harvested by rapid filtration onto Whatman GF/B glass fiber filters pre-soaked with 0.3% polyethyleneimine using a 96-well Brandel harvester. Four rapid 500- $\mu$ l washes are performed with chilled Standard Binding Buffer to reduce non-specific binding. Filters are placed in 6-ml scintillation tubes and allowed to dry overnight. The next day, 4 ml of EcoScint scintillation cocktail (National Diagnostics) are added to each tube. The tubes are capped, labeled, and counted by liquid

scintillation counting. For higher throughput assays, bound radioactivity is harvested onto 0.3% polyethyleneimine-treated, 96-well filter mats using a 96-well Filtermate harvester. The filter mats are dried, then scintillant is melted onto the filters and the radioactivity retained on the filters is counted in a Microbeta scintillation counter. Currently, nearly all of our radioligand binding assays have been adapted to this higher throughput approach.

Raw data (dpm) representing total radioligand binding (*i.e.*, specific + non-specific binding) are plotted as a function of the logarithm of the molar concentration of the competitor (*i.e.*, test or reference compound). Non-linear regression of the normalized (*i.e.*, percent radioligand binding compared to that observed in the absence of test or reference compound) raw data is performed in Prism 4.0 using the built-in three parameter logistic model describing ligand competition binding to radioligand-labeled sites:

$$y = \text{bottom} + [(\text{top} - \text{bottom}) / (1 + 10^{x - \log \text{IC}_{50}})]$$

where bottom equals the residual radioligand binding measured in the presence of 10  $\mu\text{M}$  reference compound (*i.e.*, non-specific binding) and top equals the total radioligand binding observed in the absence of competitor. The  $\log \text{IC}_{50}$  (*i.e.*, the log of the ligand concentration that reduces radioligand binding by 50%) is thus estimated from the data and used to obtain the  $K_i$  by applying the Cheng-Prusoff approximation:

$$K_i = \text{IC}_{50} / (1 + [\text{ligand}] / K_D)$$

where [ligand] equals the assay radioligand concentration and  $K_D$  equals the affinity constant of the radioligand for the target receptor.

**Figure 16.** Radioligand binding isotherms for competition binding assays wherein reference compounds and PDSP investigator-submitted compounds were assayed in parallel at the VMAT2 transporter.

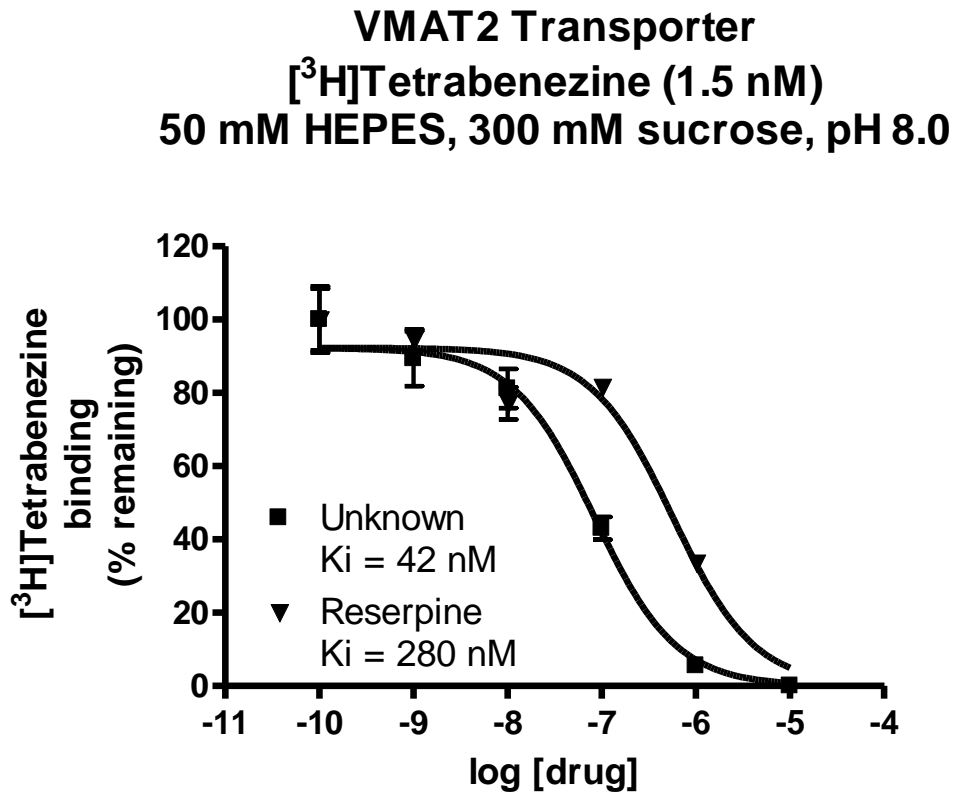

### III. Functional Assays

All functional assays are performed on transiently or stably transfected cell lines (e.g., HEK293, COS, CHO, NIH3T3).

*Gi/o-Coupled Targets: [<sup>35</sup>S]GTPγS binding to crude membrane fractions*

Receptors: Serotonin 5-HT<sub>1A</sub>, 5-HT<sub>1B</sub>, 5-HT<sub>1D</sub>, 5-HT<sub>1E</sub>, 5-HT<sub>5A</sub>; Dopamine D<sub>2</sub>, D<sub>4</sub>; Norepinephrine α<sub>2A</sub>, α<sub>2B</sub>, α<sub>2C</sub>; Muscarinic M<sub>2</sub>, M<sub>4</sub>; Opioid MOR, KOR, DOR; Histamine H<sub>3</sub>, H<sub>4</sub>

Protocol adapted from Jensen *et al. Neuropsychopharmacology* 5 Dec (2007).

#### Experimental Procedure and Data Analysis:

Assay buffer: 50 mM HEPES, 5 mM MgCl<sub>2</sub>, 150 mM NaCl, 0.2 mM EDTA, 100 mg/l ascorbic acid, pH 7.4

Reference (endogenous) agonist and compounds to be tested are dissolved in assay buffer or DMSO according to solubility. Serial dilutions of the test and reference compounds are made in binding buffer at 2x assay concentration (final assay concentrations ranging from 0.1 nM to 10 μM). Crude membrane fractions (1.8 to 3.5 cm<sup>2</sup>/well) (prepared from 10-cm plates by harvesting PBS-rinsed monolayers, resuspending and lysing in chilled, hypotonic 50 mM Tris-HCl, pH 7.4, centrifuging at 20,000 x g, decanting the supernatant and storing at -80 degrees centigrade; typically, one 10-cm plate provides sufficient material for 24 wells) are resuspended in 1.2 ml of assay buffer containing 20 μM GDP, wheat germ agglutinin (WGA)-coated scintillation proximity beads (2.4 mg), and [<sup>35</sup>S]GTPγS (300 pM final). The suspension is then added (50 μl/well) to 50 μl of the 2x test or reference compounds (each concentration assayed in triplicate) in flexible transparent PET 96-well plates. The reaction plate is sealed and incubated for 90 min at room temperature, then centrifuged for 5 min at 216 x g, and finally loaded into a Wallac MicroBeta TriLux counter. Non-specific [<sup>35</sup>S]GTPγS binding is assessed at the maximum concentration of reference agonist in the presence of 10 μM antagonist (see Table 9). The background signal is measured at 10 μM reference agonist in the presence of 10 μM unlabeled GTPγS.

Raw data (dpm) representing total [<sup>35</sup>S]GTPγS binding (*i.e.*, specific + non-specific binding) are plotted as a function of the logarithm of the molar concentration of the drug (*i.e.*, test or reference compound). Non-linear regression of the normalized (*i.e.*, fold increase in [<sup>35</sup>S]GTPγS binding over that observed in the absence of test or reference compound) data is performed in Prism 4.0 (GraphPad Software) using the built-in three parameter logistic model (*i.e.*, sigmoidal concentration-response) describing agonist-stimulated activation of one receptor population:

$$y = \text{bottom} + [(\text{top}-\text{bottom})/(1 + 10^{\text{x}-\log\text{EC}_{50}})]$$

where bottom equals the best-fit basal [<sup>35</sup>S]GTPγS binding and top equals the best-fit maximum [<sup>35</sup>S]GTPγS binding. The log EC<sub>50</sub> (*i.e.*, the log of the drug concentration that increases [<sup>35</sup>S]GTPγS binding by 50% of the top) is thus estimated from the data, and the EC<sub>50</sub> (agonist potency) is obtained. To obtain an estimate of the relative efficacy of the test compound (Rel. *E*<sub>max</sub>), its data-fit top is compared to and expressed as a ratio of that for the reference agonist (Rel. *E*<sub>max</sub> of 1.00).

| Receptor           | Antagonist              |
|--------------------|-------------------------|
| 5-HT <sub>1A</sub> | <b>WAY100635</b>        |
| 5-HT <sub>1B</sub> | <b>SB216641</b>         |
| 5-HT <sub>1D</sub> | <b>BRL15572</b>         |
| 5-HT <sub>1E</sub> | <b>Methylergonovine</b> |
| 5-HT <sub>5A</sub> | <b>Methiothepin</b>     |
| D <sub>2</sub>     | <b>L741626</b>          |
| D <sub>4</sub>     | <b>L745870</b>          |
| α <sub>2A</sub>    | <b>Yohimbine</b>        |
| α <sub>2B</sub>    | <b>Yohimbine</b>        |
| α <sub>2C</sub>    | <b>Yohimbine</b>        |
| M <sub>2</sub>     | <b>Methoctramine</b>    |
| M <sub>4</sub>     | <b>Tropicamide</b>      |
| MOR                | <b>Cyprodime</b>        |
| KOR                | <b>Nor-BNI</b>          |
| DOR                | <b>Naltrindole</b>      |
| H <sub>3</sub>     | <b>Ciproxifan</b>       |
| H <sub>4</sub>     | <b>JNJ7777120</b>       |

**Table 10.** Potency (EC<sub>50</sub>) of 5-HT at Gi/o-coupled 5-HT receptors and selective antagonists used to assess non-specific [<sup>35</sup>S]GTPγS binding. NS, no selective antagonist available.

**Figure 17.** Representative drug-stimulated [<sup>35</sup>S]GTP<sub>γ</sub>S binding isotherms, wherein a reference full agonist and a PDSP investigator-submitted unknown were assayed in parallel.

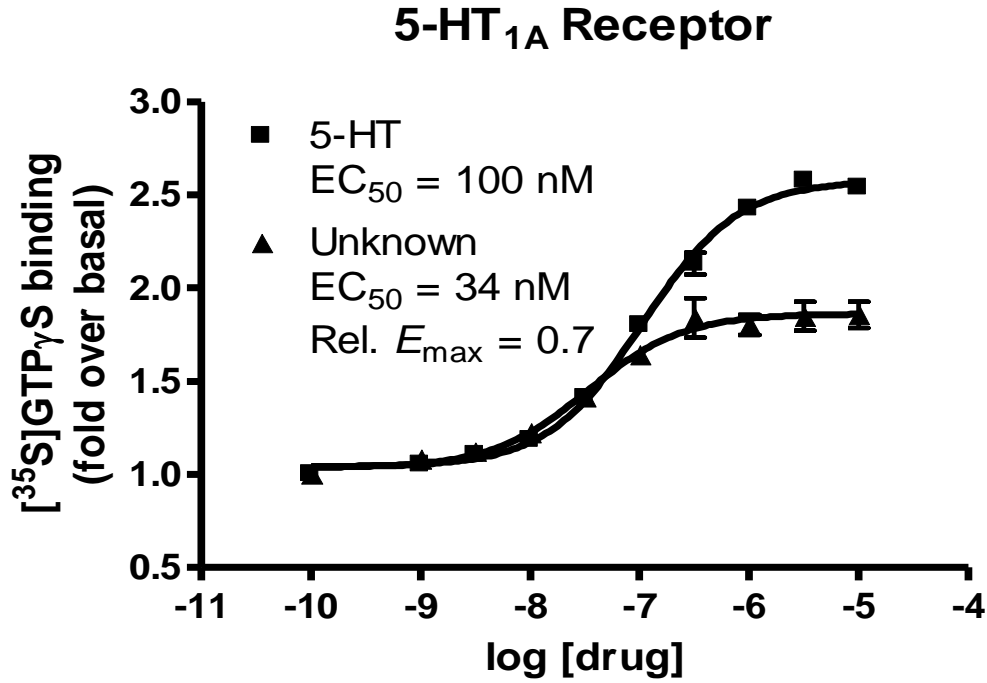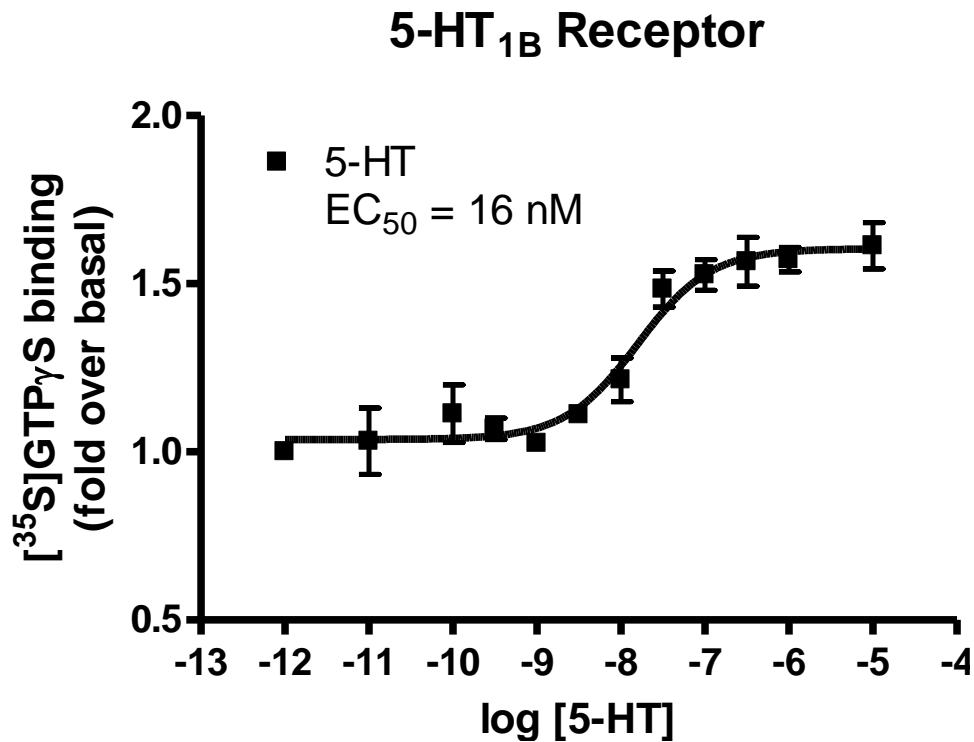

### 5-HT<sub>1E</sub> Receptor

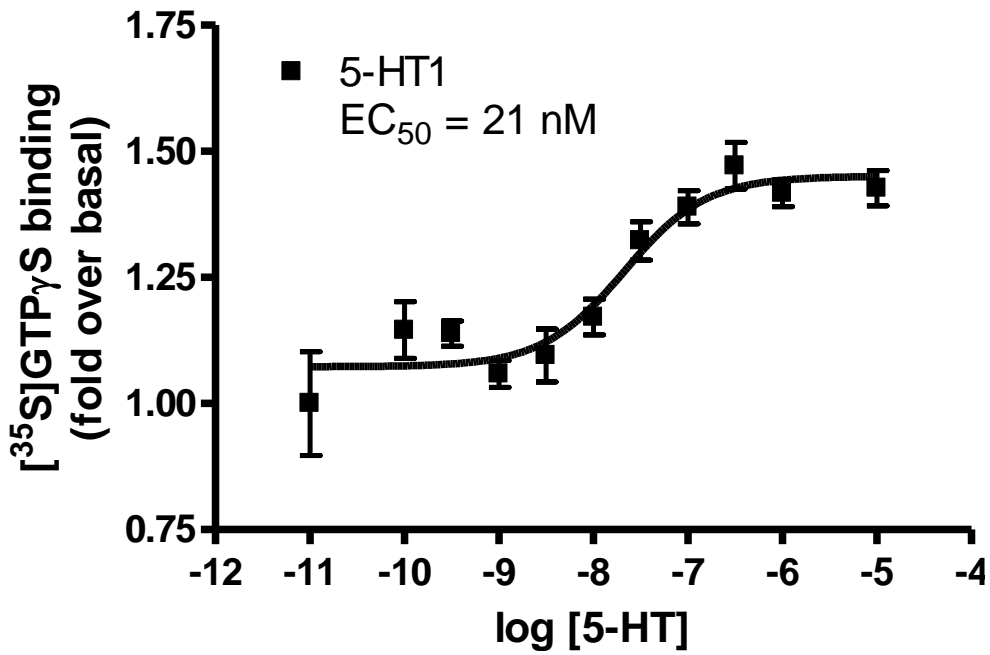

### D2 Receptor

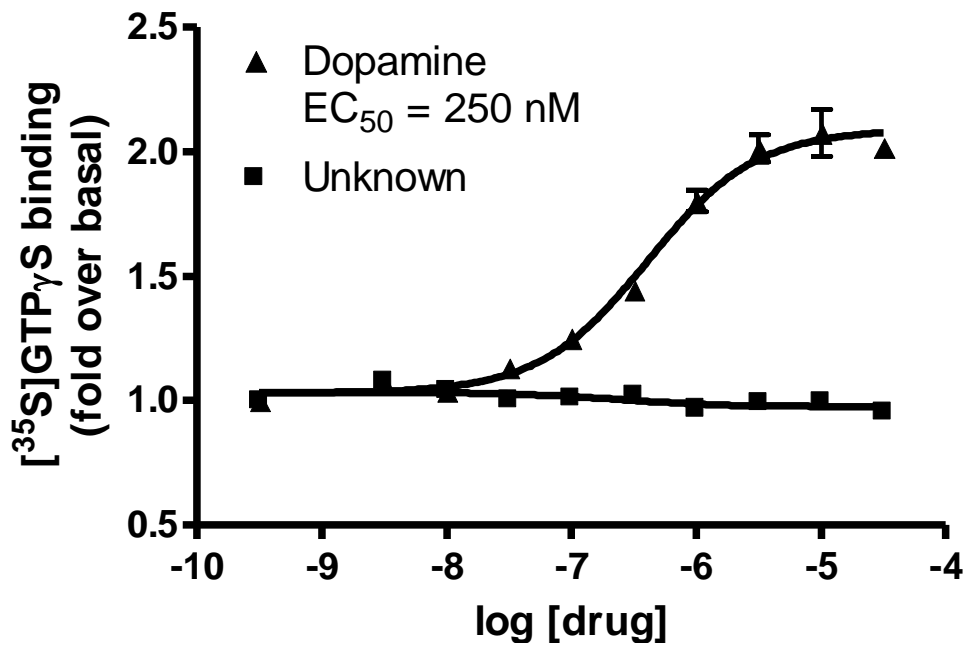

### D4 Receptor

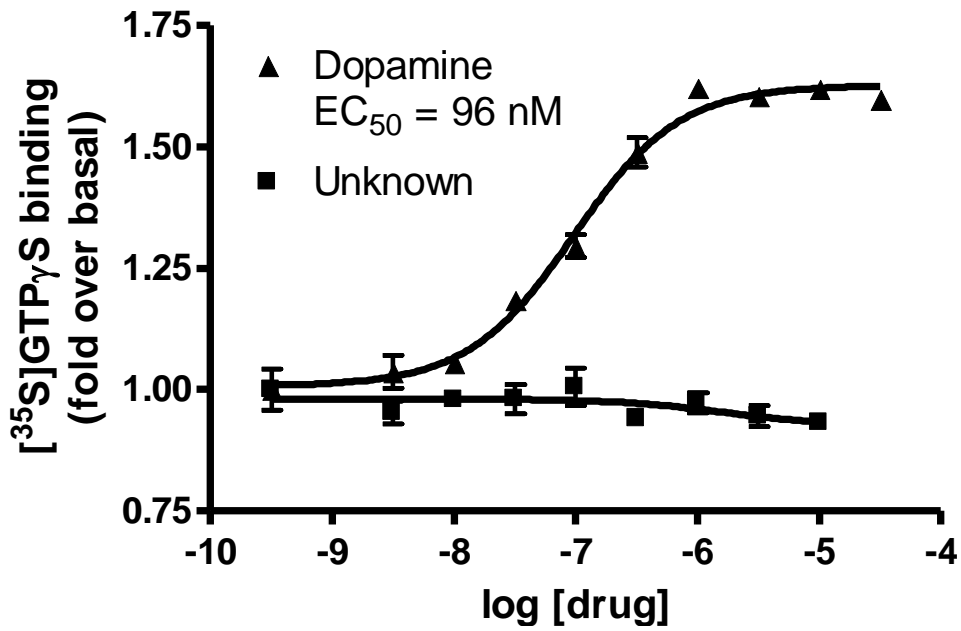

### α2A Adrenergic Receptor

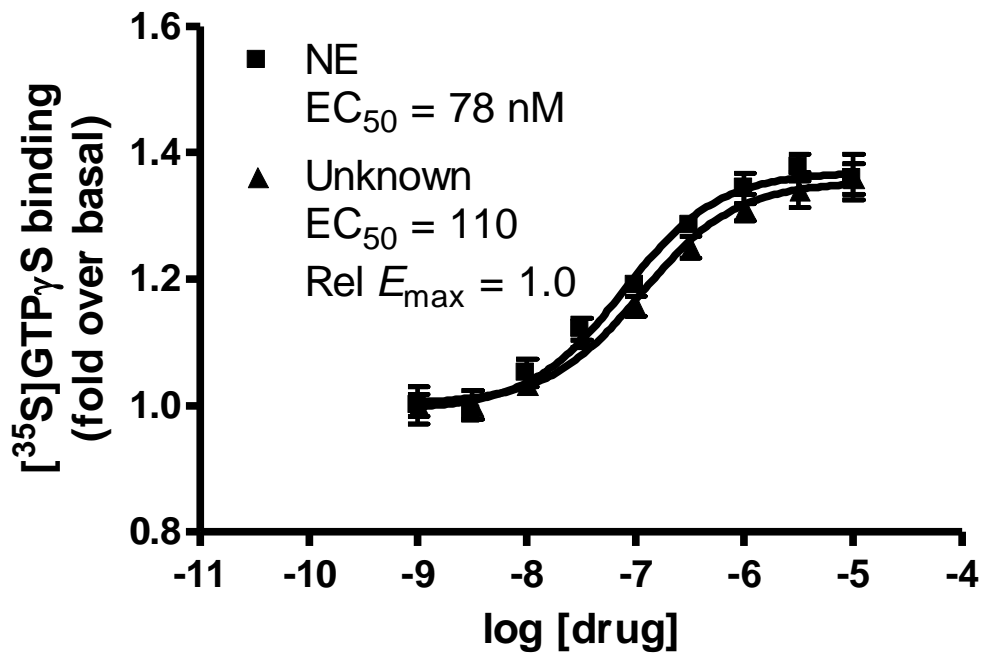



### $\alpha$ 2C Adrenergic Receptor

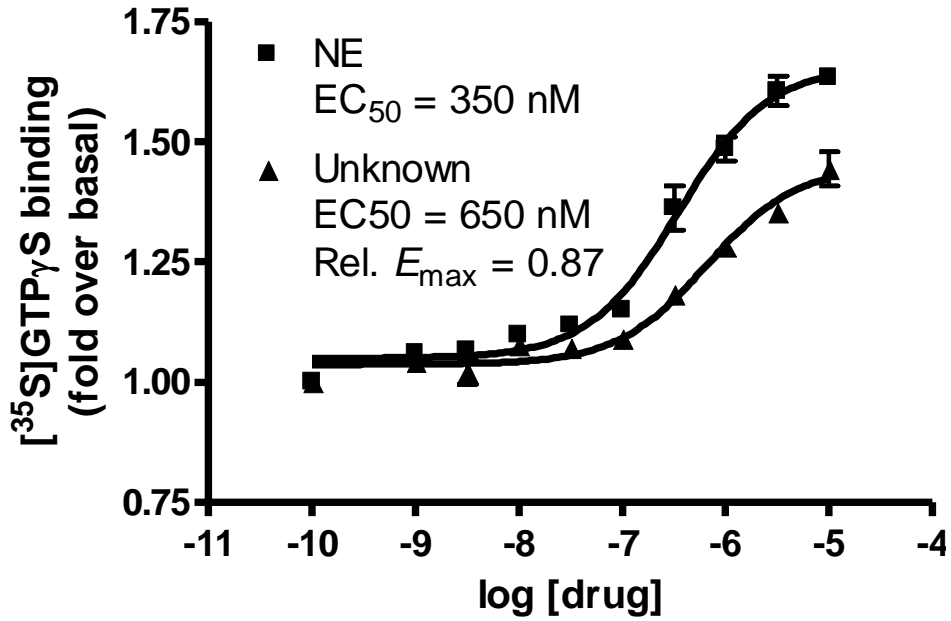

### Mu-Opioid Receptor

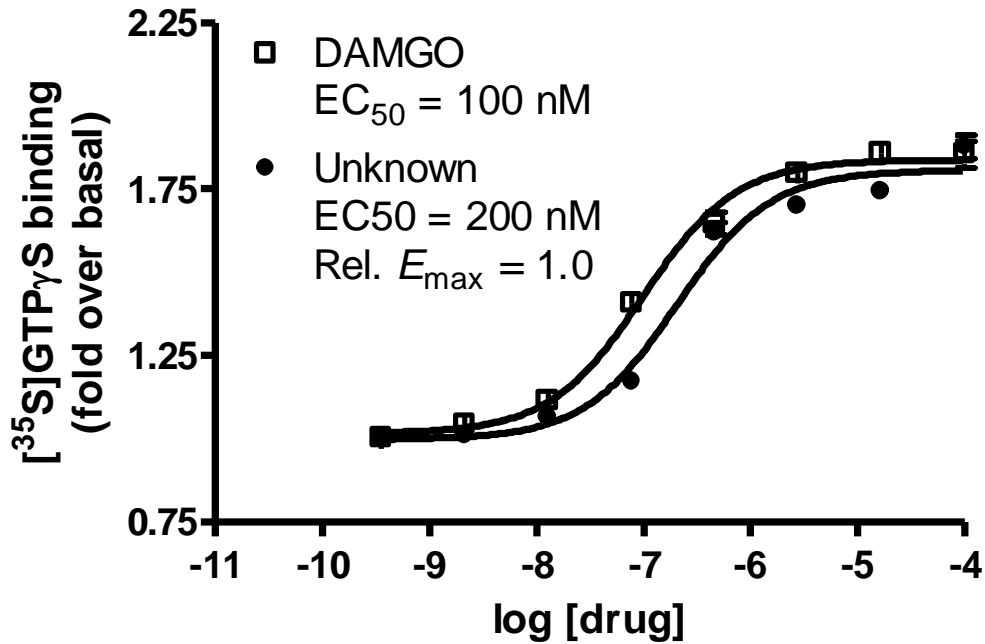

### Delta-Opioid Receptor

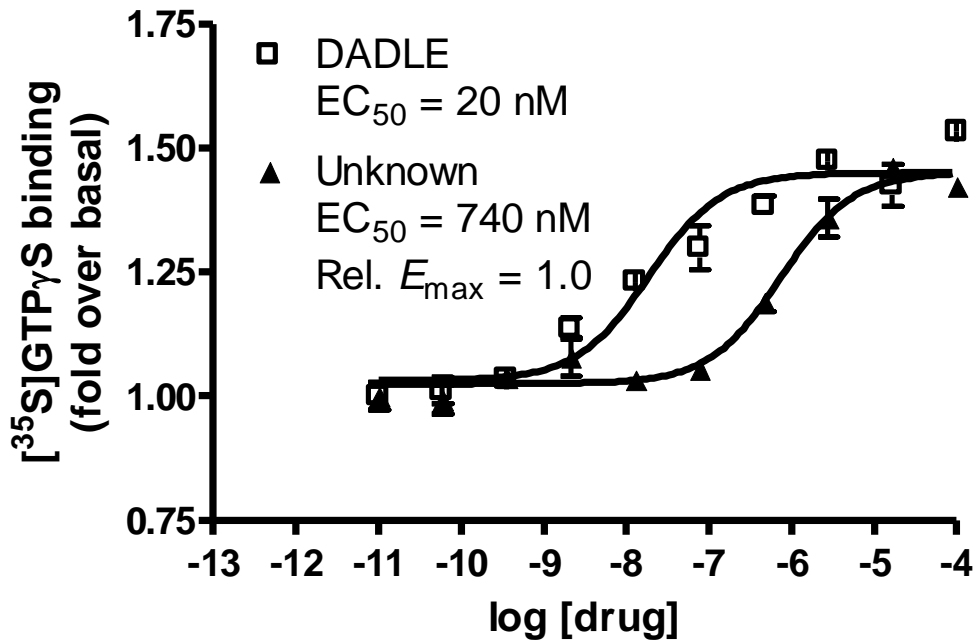

### Kappa-Opioid Receptor

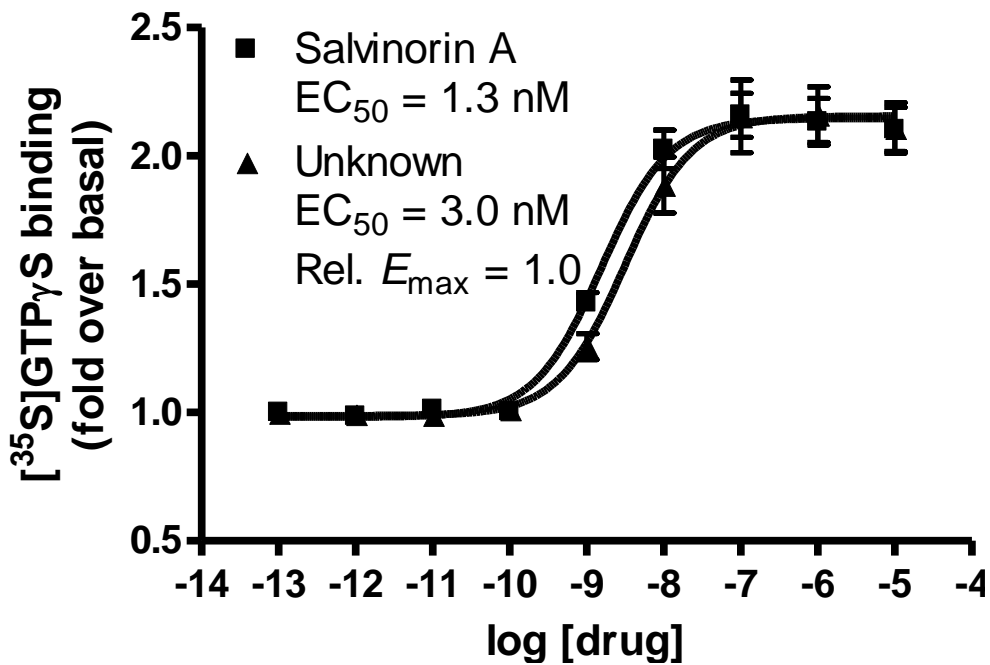

### M2 Receptor

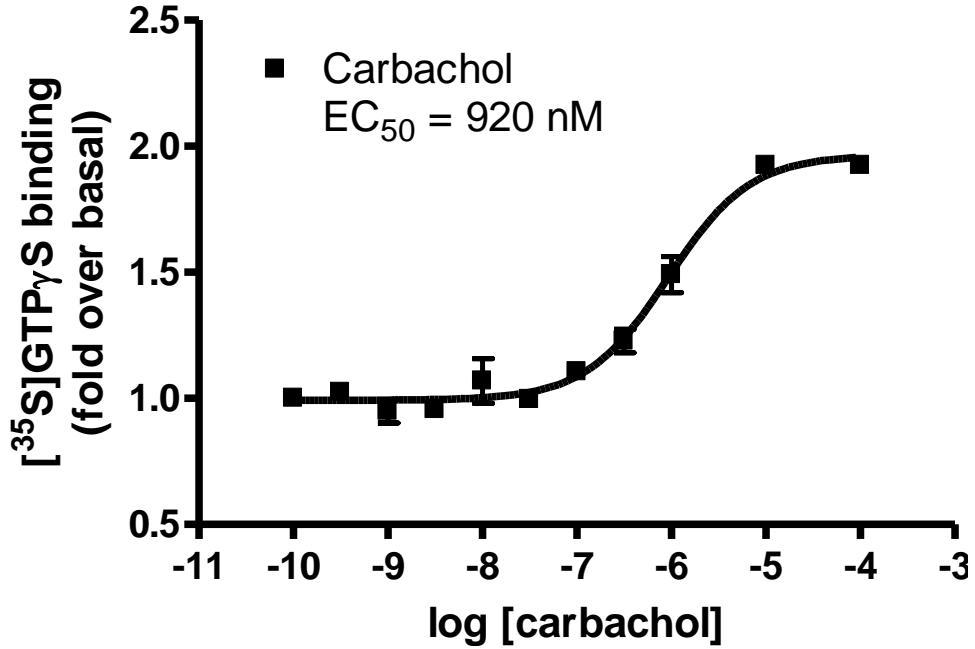

### M4 Receptor

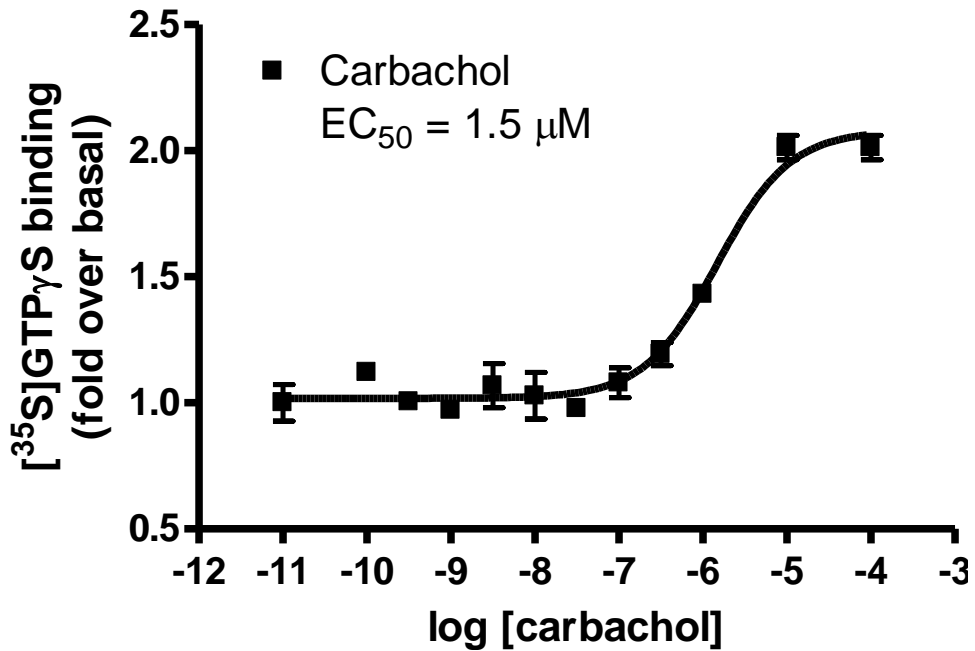

### *Gq/11-Coupled Targets: intracellular calcium mobilization*

**Receptors:** Serotonin 5-HT<sub>2A</sub>, 5-HT<sub>2B</sub>, 5-HT<sub>2C</sub>; Glutamate mGluR<sub>1-8</sub>; Norepinephrine  $\alpha_{1A}$ ,  $\alpha_{1B}$ ,  $\alpha_{1D}$ ; Muscarinic M<sub>1</sub>, M<sub>3</sub>, M<sub>5</sub>; Histamine H<sub>1</sub>, H<sub>2</sub>; Purinergic P2Y<sub>1</sub>, P2Y<sub>2</sub>, P2Y<sub>4</sub>, P2Y<sub>6</sub>; Oxytocin; Vasopressin V<sub>1</sub>, V<sub>2</sub>, V<sub>3</sub>; GPR40, GPR41, GPR43; MC3, MC4

Assay Buffer: 1X Hanks Balanced Salt Solution, 20 mM HEPES, 2.5 mM probenecid, pH 7.4 is used to reconstitute lyophilized Calcium Plus Assay Kit dye (Molecular Devices)

Protocol adapted from Davies *et al. Psychopharmacology* 178(4):451-460 (2005).

#### Experimental Procedure and Data Analysis:

Receptor-expressing cell lines are seeded in glass-bottom 96- or 384-well, poly-L-lysine-coated plates 48 hours prior to the assay (40,000 cells per well or 6,700 cells, respectively) in DMEM containing 5% dialyzed serum. Twenty hours prior to the assay, the medium is changed to serum-free DMEM. Then, the cells are preincubated in 30  $\mu$ l (96-well plates) or 20  $\mu$ l (384-well plates) of calcium dye-containing assay buffer (the lyophilized dye is reconstituted with 15 ml of assay buffer) at 37 degrees centigrade for 75 min in a humidified incubator. During that time, serial dilutions of the reference and test compounds are made at 2x assay concentration (final assay concentrations ranging from 0.1 nM to 10  $\mu$ M). Just prior to the assay, the plates are allowed to cool to room temperature for 10 min and then are transferred to a FLIPR Tetra fluorescence image plate reader (Molecular Devices). Basal fluorescence (excitation 488 nm, emission 510-570 nm) is measured for 20 sec, then test compound or reference agonist dilutions (2x assay concentration) are added (30  $\mu$ l for 96-well plates, 20  $\mu$ l for 384-well plates, each concentration assayed in triplicate) and fluorescence is measured for 60 sec. The maximum fluorescence values during the baseline and test compound or reference agonist addition phases (for agonist assays) are exported for analysis.

For agonist tests, raw data (maximum fluorescence, fluorescence units) for each concentration of test compound or reference are normalized to the baseline fluorescence (reported as fold increase over basal) and plotted as a function of the logarithm of the molar concentration of the drug (*i.e.*, test or reference compound). Non-linear regression of the normalized data is performed in Prism 4.0 (GraphPad Software) using the built-in three parameter logistic model (*i.e.*, sigmoidal concentration-response) describing agonist-stimulated activation of one receptor population:

$$y = \text{bottom} + [(\text{top}-\text{bottom})/(1 + 10^{\text{x}-\log\text{EC50}})]$$

where bottom equals the best-fit basal fluorescence and top equals the best-fit maximal fluorescence stimulated by the test compound or reference agonist. The log EC<sub>50</sub> (*i.e.*, the log of the drug concentration that increases fluorescence by 50% of the maximum fluorescence observed for the test compound or reference agonist) is thus estimated from the data, and the EC<sub>50</sub> (agonist potency) is obtained. To obtain an estimate of the relative efficacy of the test compound (Rel.  $E_{max}$ ), its best-fit top is compared to and expressed as a ratio of that for the reference agonist (Rel.  $E_{max}$  of the reference agonist is 1.00).

To ascertain whether test compounds are antagonists, a double-addition paradigm is employed. After measuring baseline fluorescence for 20 seconds, 30  $\mu$ l of test compound (20  $\mu$ M) is added (10  $\mu$ M final concentration, assayed in triplicate) and fluorescence is measured for an additional 15 min. Then, 30  $\mu$ l of reference agonist (3X; EC<sub>90</sub>) is added (final concentration of agonist is EC<sub>30</sub>) and fluorescence is measured for 60 sec. Maximum baseline-normalized fluorescence evoked by the reference agonist in the presence of test compound is compared to the maximum baseline-normalized fluorescence elicited by the reference agonist following addition of vehicle instead of test compound and expressed as a ratio. 'Hits' (compounds that antagonize reference agonist-stimulated increases in baseline-normalized fluorescence by at least 50%) are then characterized by a modified Schild analysis.

For modified Schild analysis, a family of reference agonist concentration-response isotherms is generated in the absence and presence of graded concentrations of test compound (added 15 min prior to reference agonist). Theoretically, compounds that are competitive antagonists cause a dextral shift of agonist concentration-response isotherms without reducing the maximum response to agonist (*i.e.*, surmountable antagonism). However, on occasion, factors such as non-competitive antagonism, hemiequilibria, and/or receptor reserve cause apparent insurmountable antagonism. To account for such deviations, we apply the modified Lew-Angus method to ascertain antagonist potency (Christopoulos et al., 1999). Briefly, equieffective concentrations of agonist (concentrations of agonist that elicit a response equal to the EC<sub>25%</sub> of the agonist control curve) are plotted as a function of the test compound concentration present in the wells in which they were measured. Non-linear regression of the baseline-normalized data is performed in Prism 4.0 using the following equation:

$$pEC_{25\%} = -\log ([B] + 10^{-pK}) - \log c$$

where EC<sub>25%</sub> equals the concentration of agonist that elicits a response equal to 25% of the maximum agonist control curve response and [B] equals the antagonist concentration; K, c, and s are fit parameters. The parameter s is equal to the Schild slope factor. If s is not significantly different from unity, pK equals pK<sub>B</sub>; otherwise, pA<sub>2</sub> is calculated (pA<sub>2</sub> = pK/s). The parameter c equals the ratio EC<sub>25%</sub>/[B].

**Figure 18.** Representative reference agonist-stimulated intracellular calcium mobilization isotherms for selected Gq/11-coupled receptors available for screening.

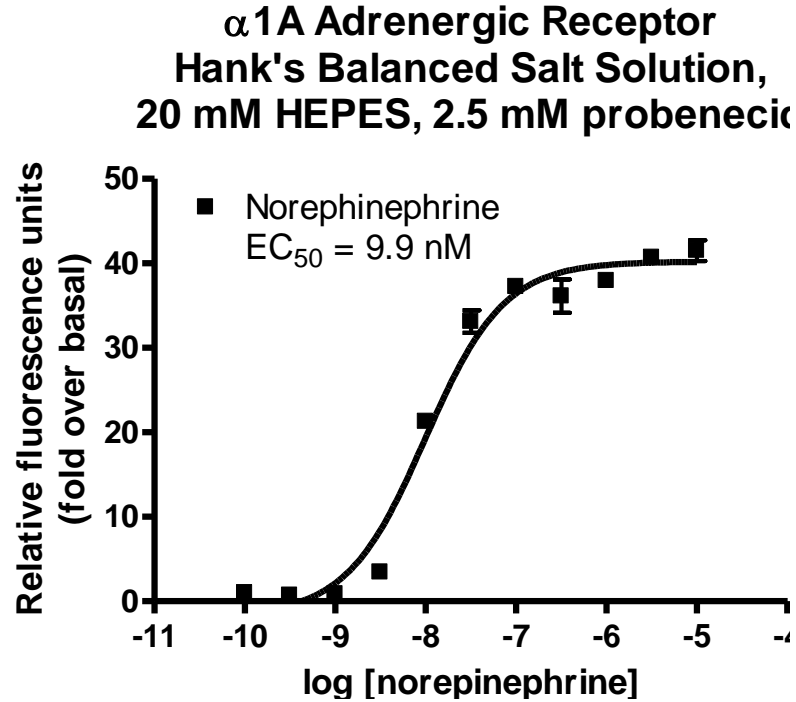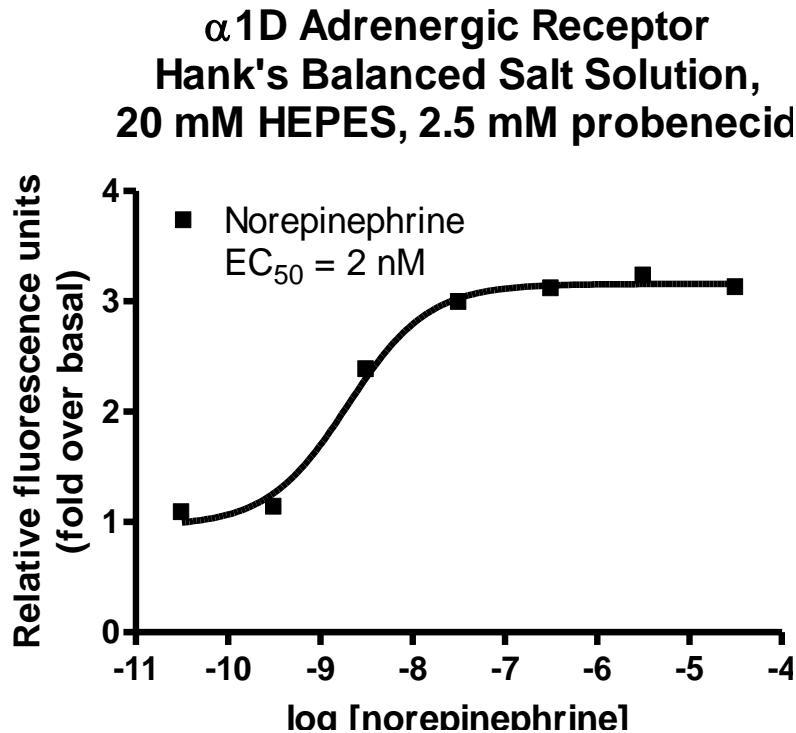

**5-HT<sub>2A</sub> Receptor**  
**Hank's Balanced Salt Solution,**  
**20 mM HEPES, 2.5 mM probenecid**

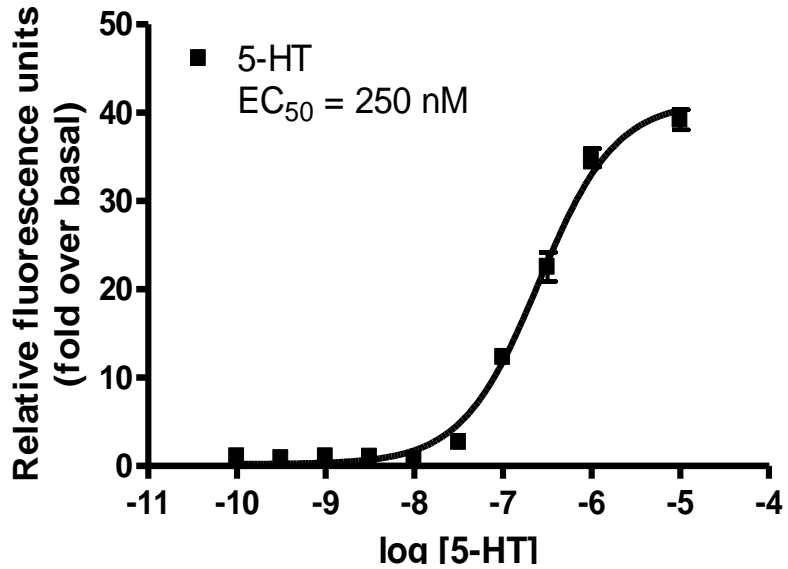

**5-HT<sub>2B</sub> Receptor**  
**Hank's Balanced Salt Solution,**  
**20 mM HEPES, 2.5 mM probenecid**

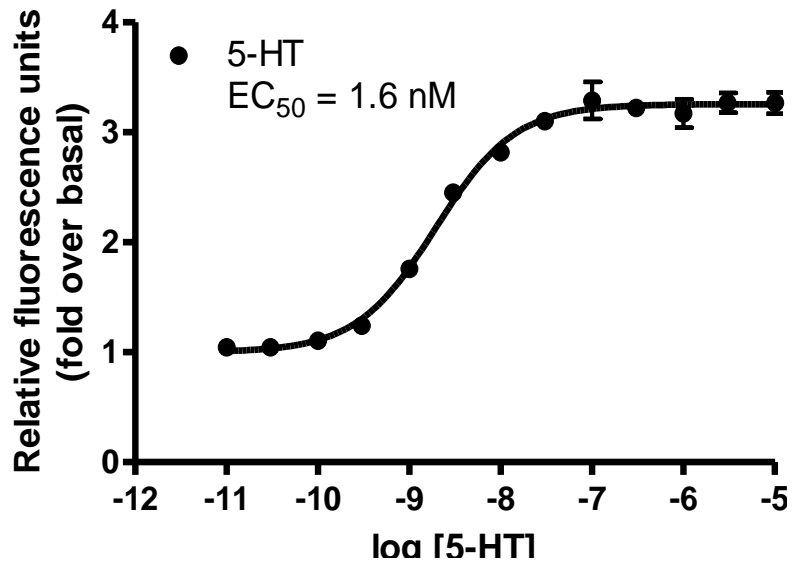

**5-HT<sub>2C</sub> Receptor**  
**Hank's Balanced Salt Solution,**  
**20 mM HEPES, 2.5 mM probenecid**

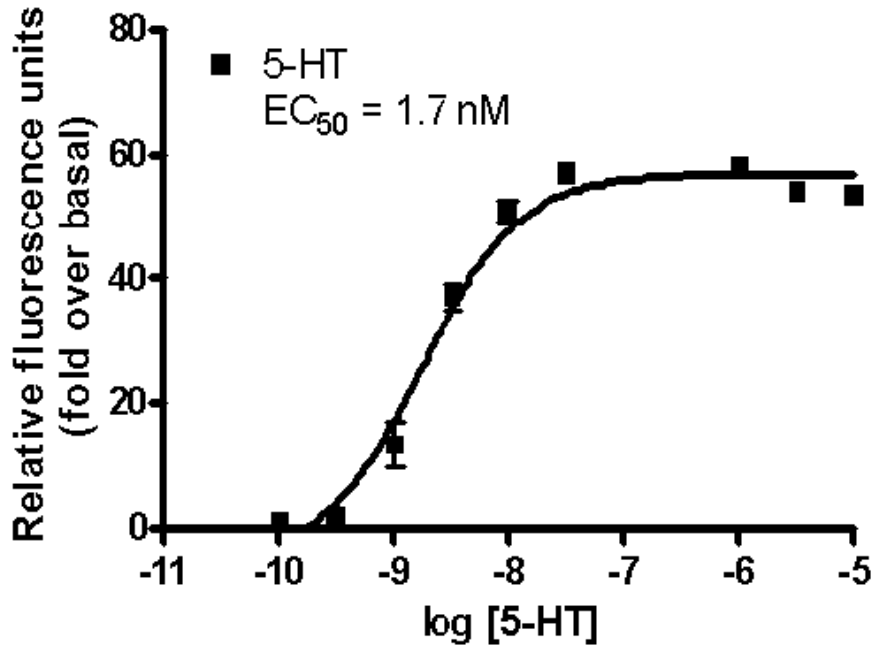

**M1 Receptors**  
**Hank's Buffered Salt Solution,**  
**20 mM HEPES, 2.5 mM probenecid**

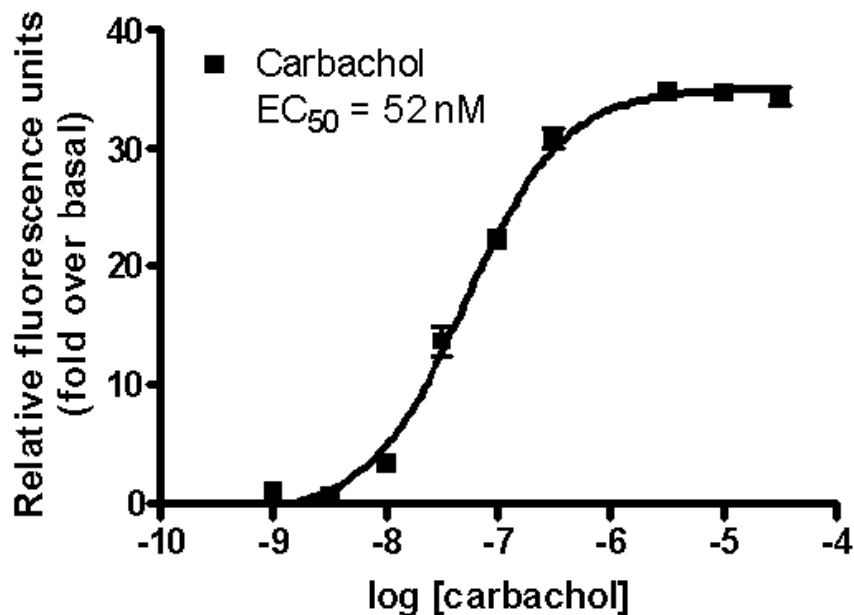



### M3 Receptor

Hank's Balanced Salt Solution,  
20 mM HEPES, 2.5 mM probenecid

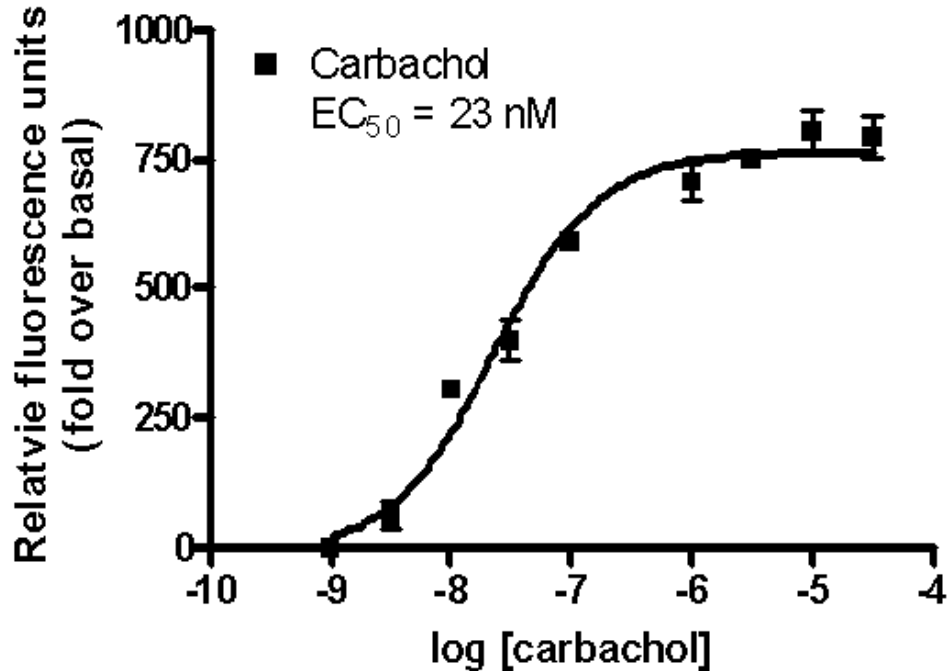

### M5 Receptor

Hank's Balanced Salt Solution,  
20 mM HEPES, 2.5 mM probenecid

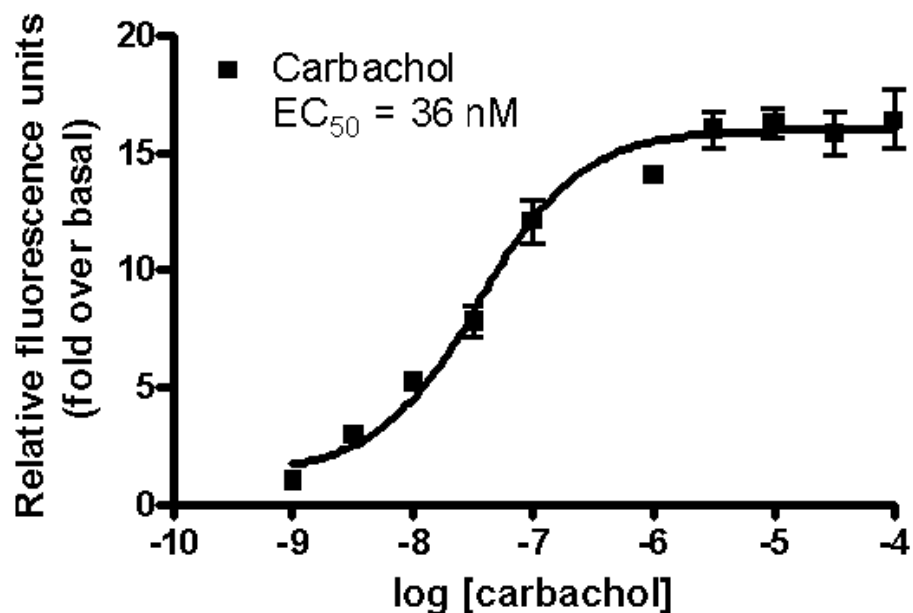

**P2Y1 Receptor**  
**Hank's Balanced Salt Solution,**  
**20 mM HEPES, 2.5 mM probenecid**

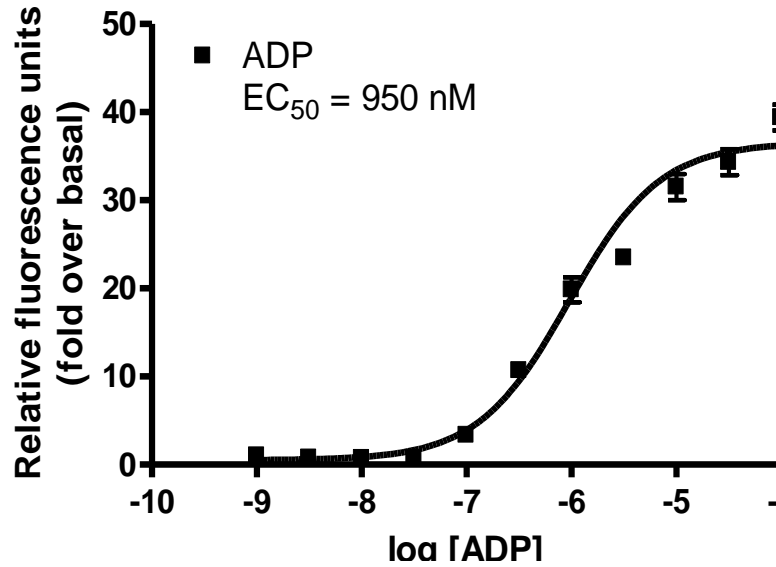

**P2Y2 Receptor**  
**Hank's Balanced Salt Solution,**  
**20 mM HEPES, 2.5 mM probenecid**

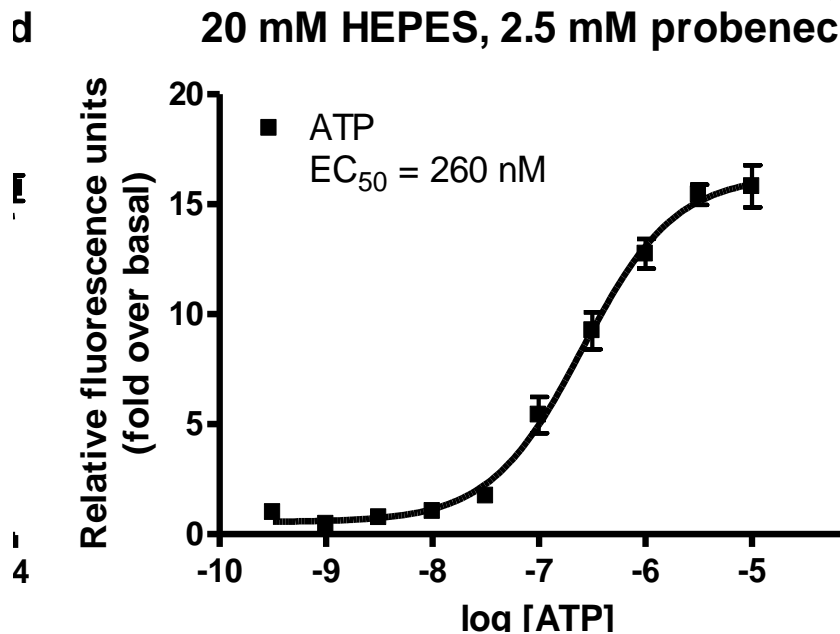

**P2Y4 Receptor**  
**Hank's Balanced Salt Solution,**  
**20 mM HEPES, 2.5 mM probenecid**

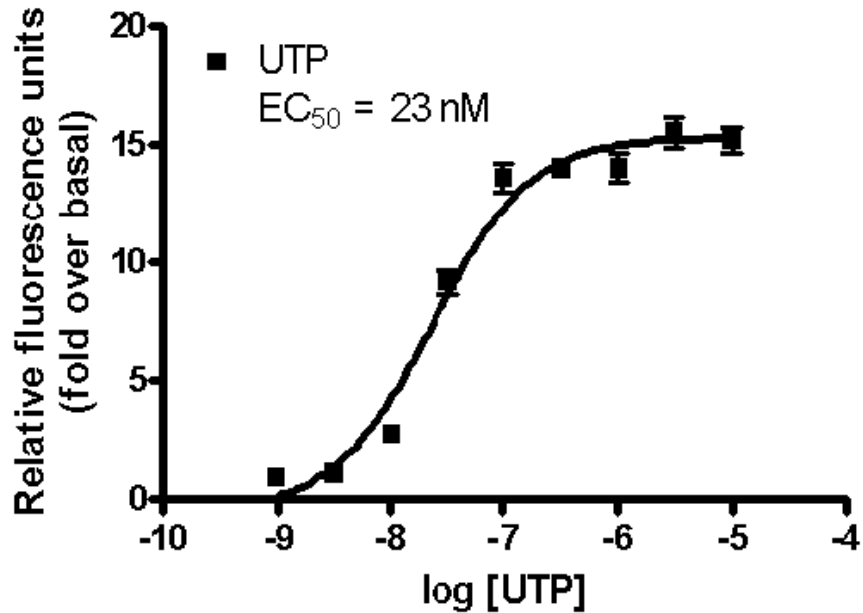

**P2Y6 Receptor**  
**Hank's Balanced Salt Solution,**  
**20 mM HEPES, 2.5 mM probenecid**

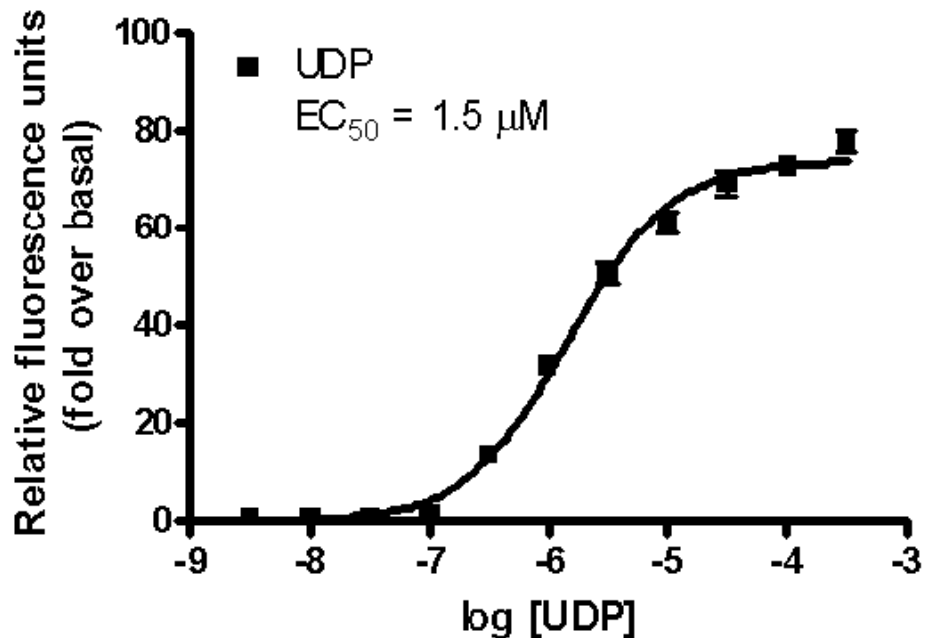

### H1 Receptor

Hank's Buffered Salt Solution,  
20 mM HEPES, 2.5 mM probenecid

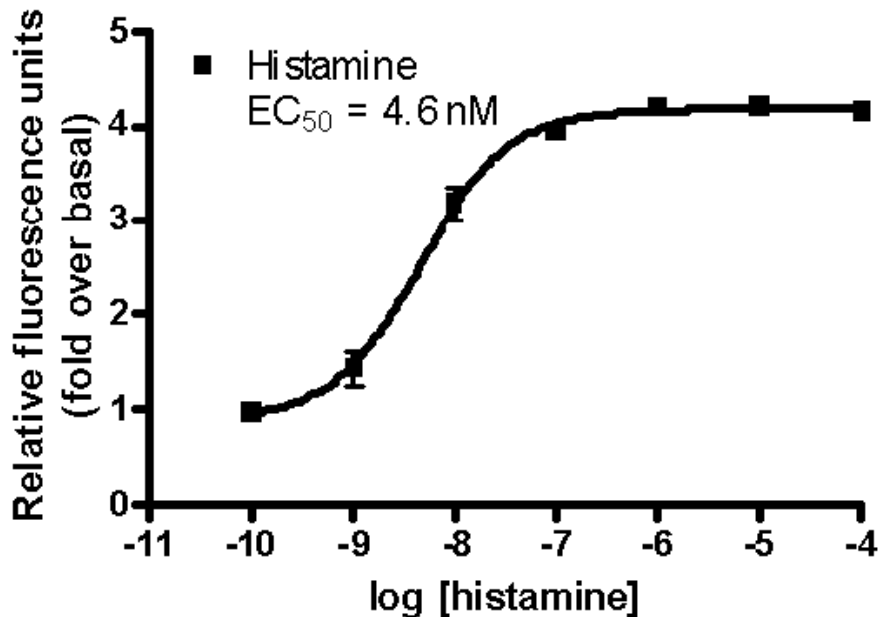

### Oxytocin Receptor

Hank's Balanced Salt Solution,  
20 mM HEPES, 2.5 mM probenecid

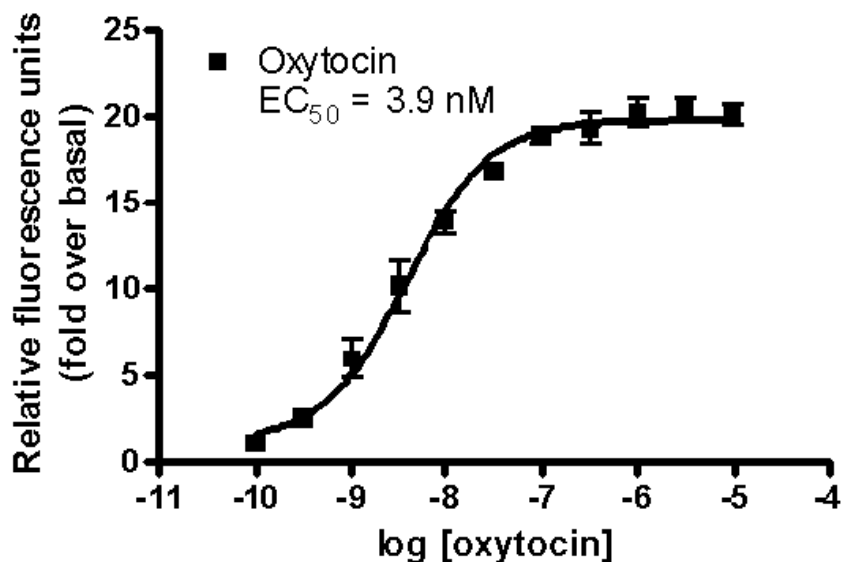

**GPR40 Receptor**  
**Hank's Balanced Salt Solution,**  
**20 mM HEPES, 2.5 mM probenecid**

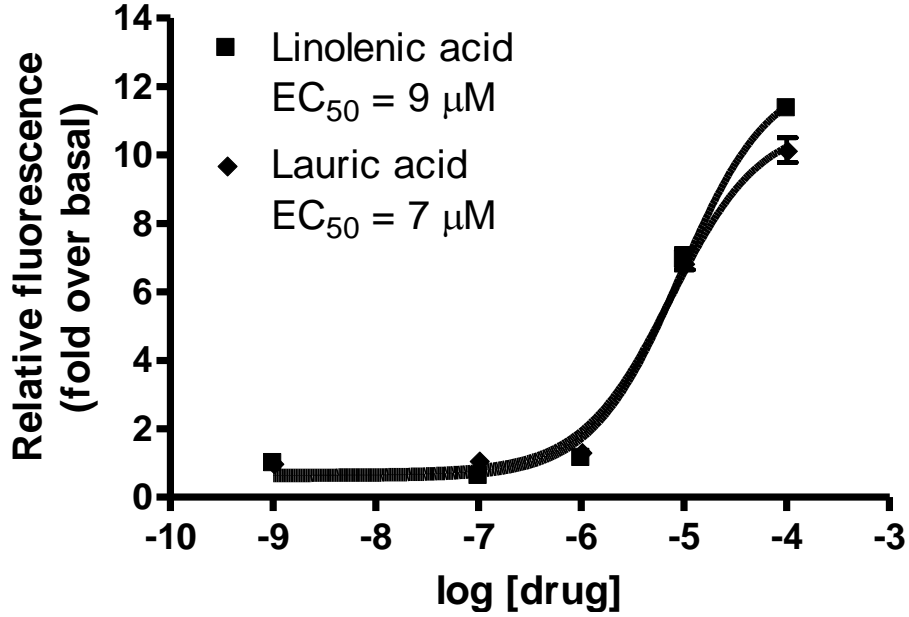

**GPR41 Receptor**  
**Hank's Balanced Salt Solution,**  
**20 mM HEPES, 2.5 mM probenecid**

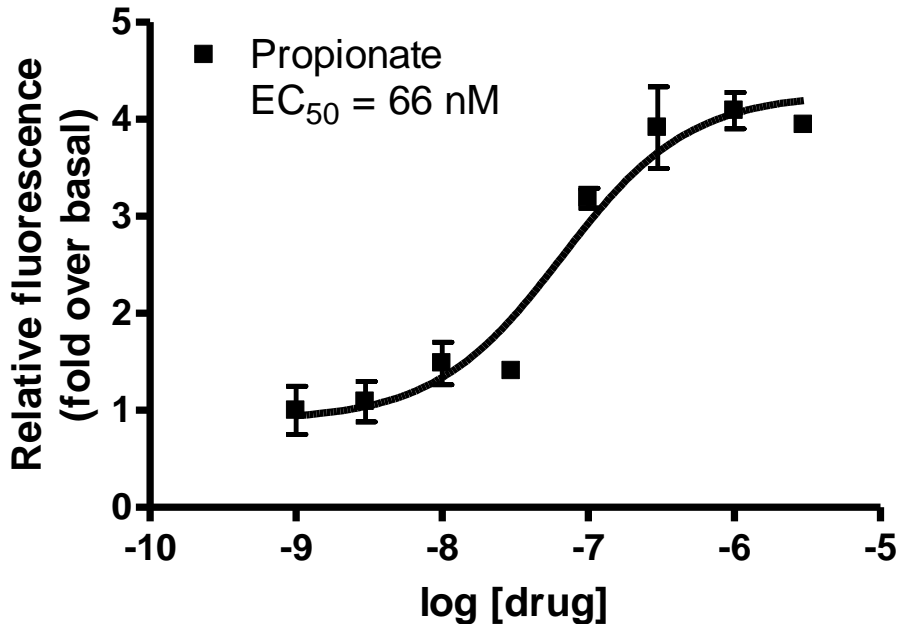

### GPR43 Receptor Hank's Balanced Salt Solution, 20 mM HEPES, 2.5 mM probenecid

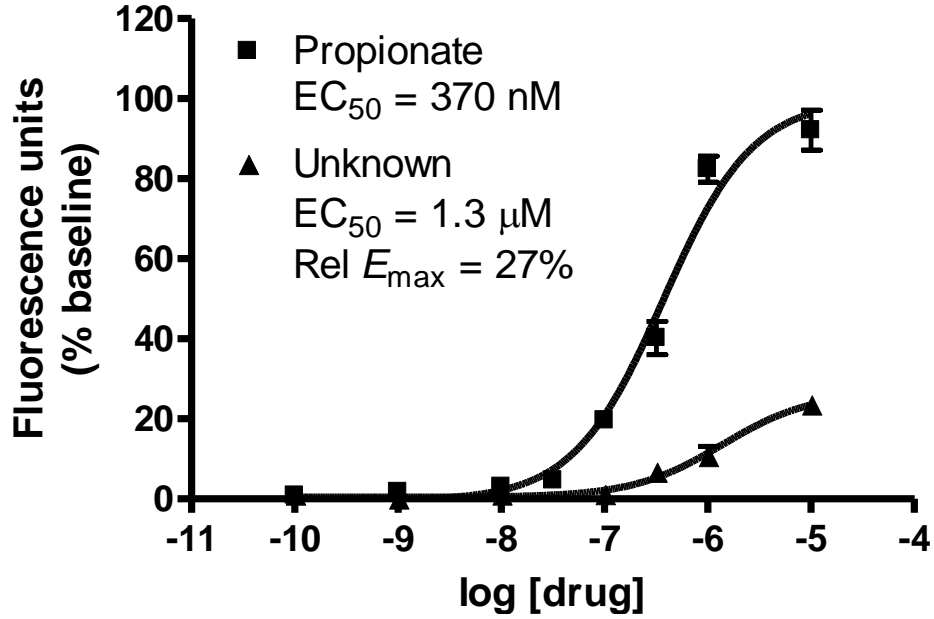

### MC3 Receptor Hank's Balanced Salt Solution, 20 mM HEPES, 2.5 mM probenecid

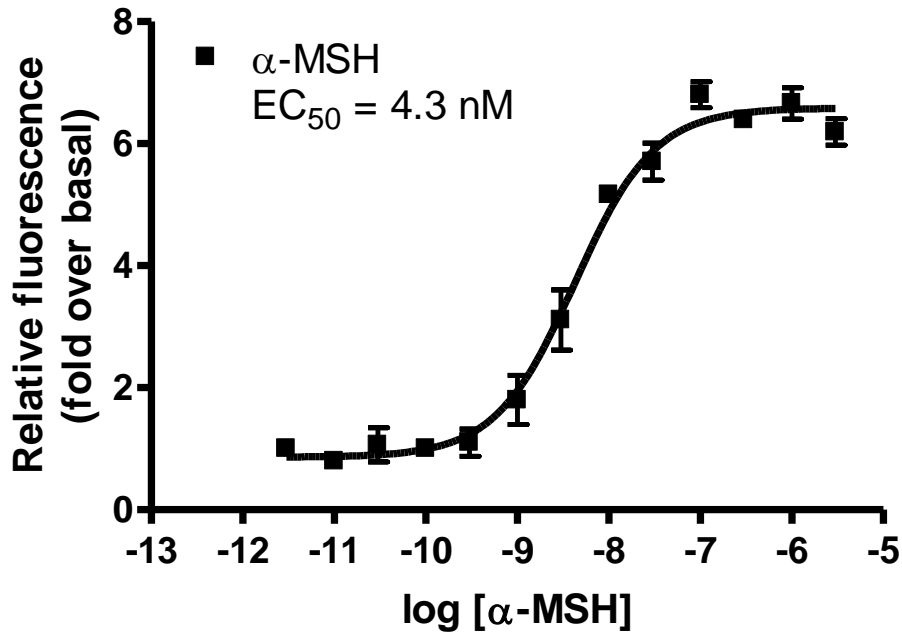

**MC4 Receptor**  
**Hank's Balanced Salt Solution,**  
**20 mM HEPES, 2.5 mM probenecid**

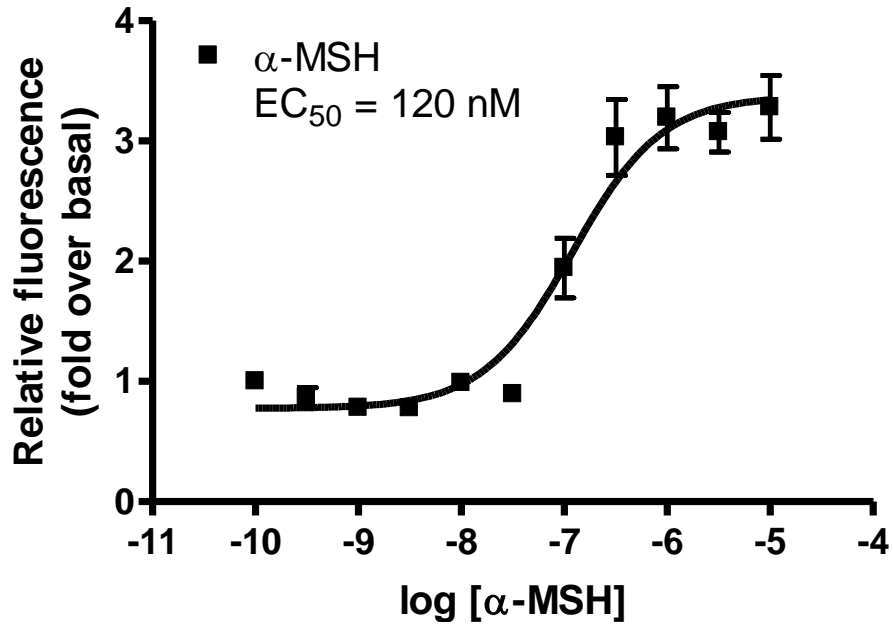

**Figure 19.** Representative primary functional screen results of NIMH PDSP Investigator-submitted unknowns (Unk) assayed against Neurokinin NK1, NK2, and NK3 receptors, and Vasopressin V1 and V2 receptors.

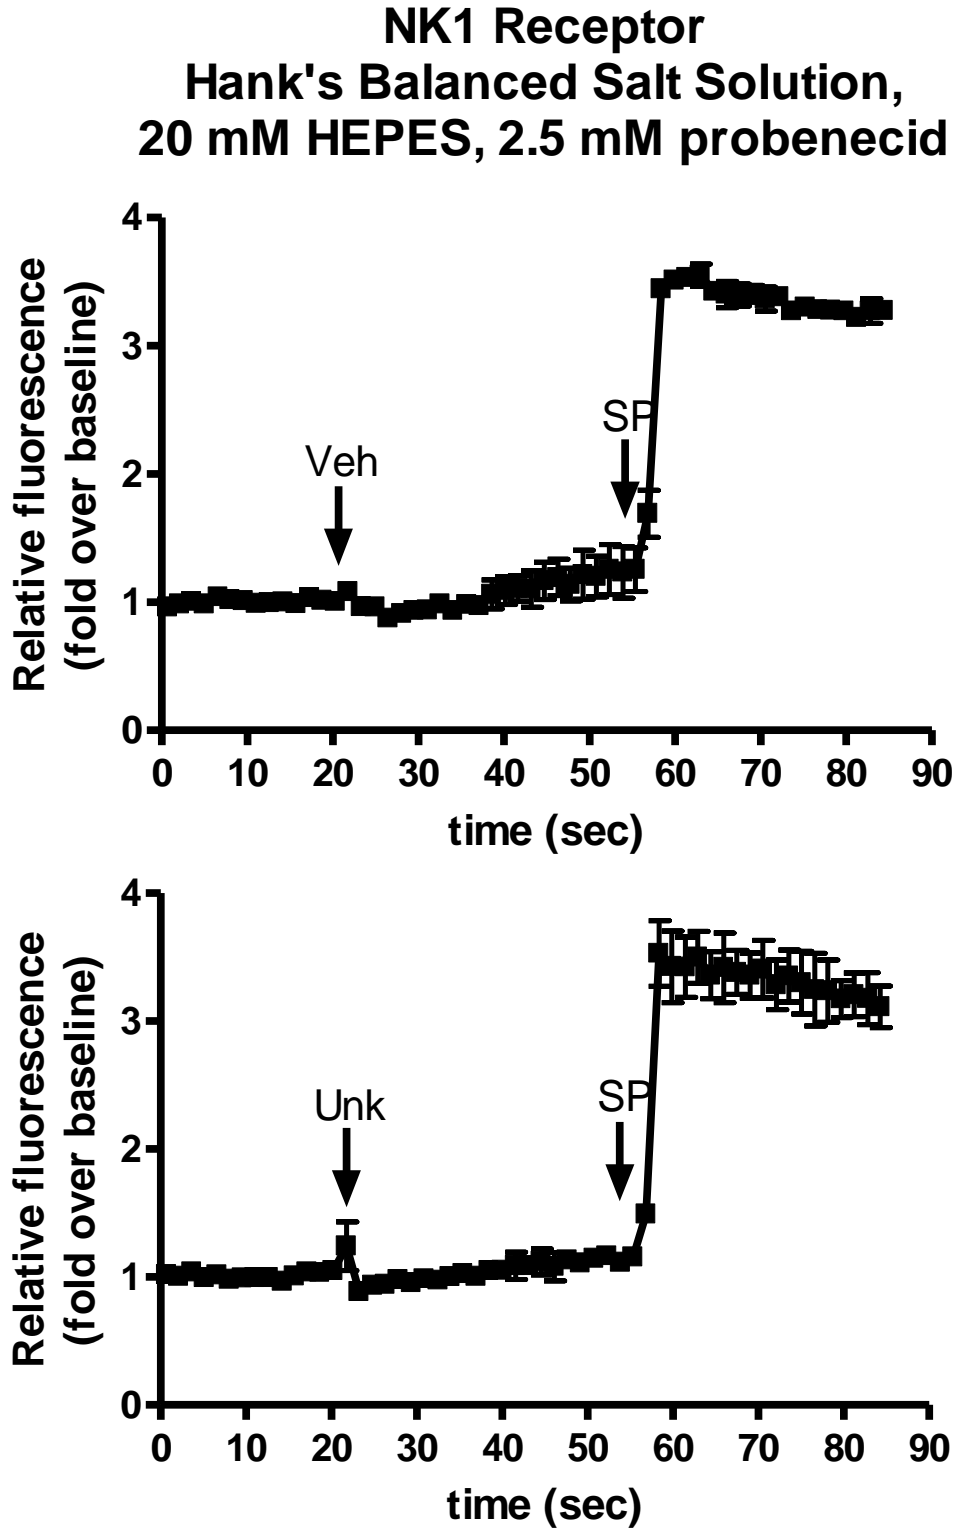



### NK2 Receptor Hank's Balanced Salt Solution, 20 mM HEPES, 2.5 mM probenecid

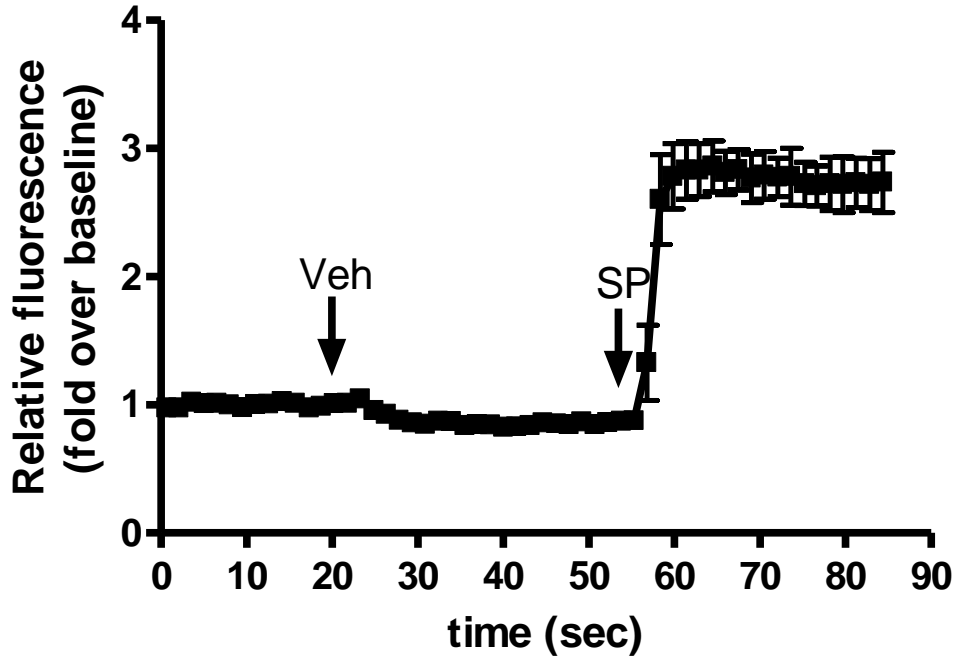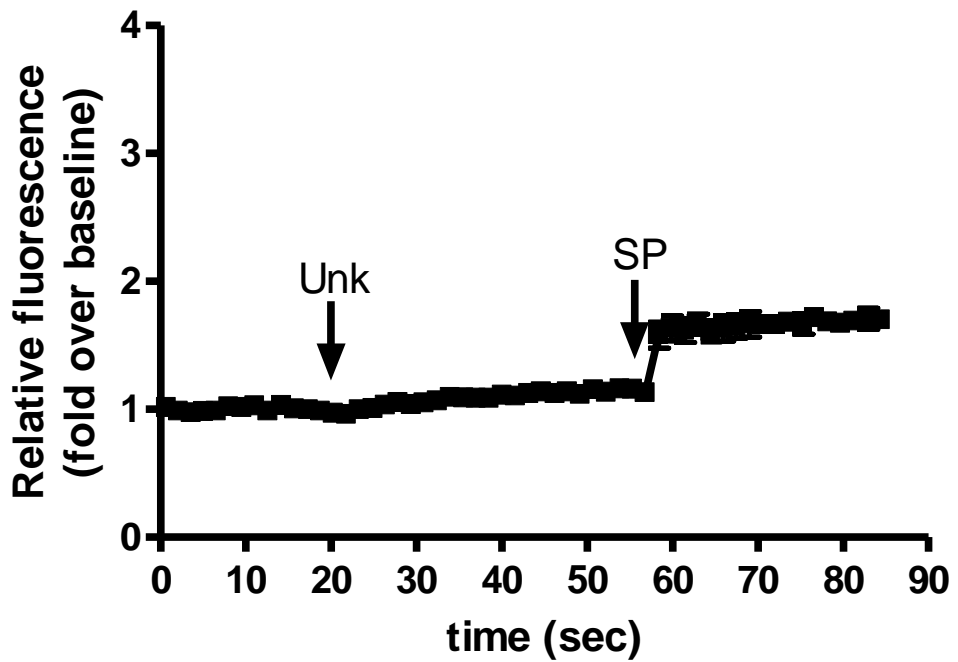

### NK3 Receptor Hank's Balanced Salt Solution, 20 mM HEPES, 2.5 mM probenecid

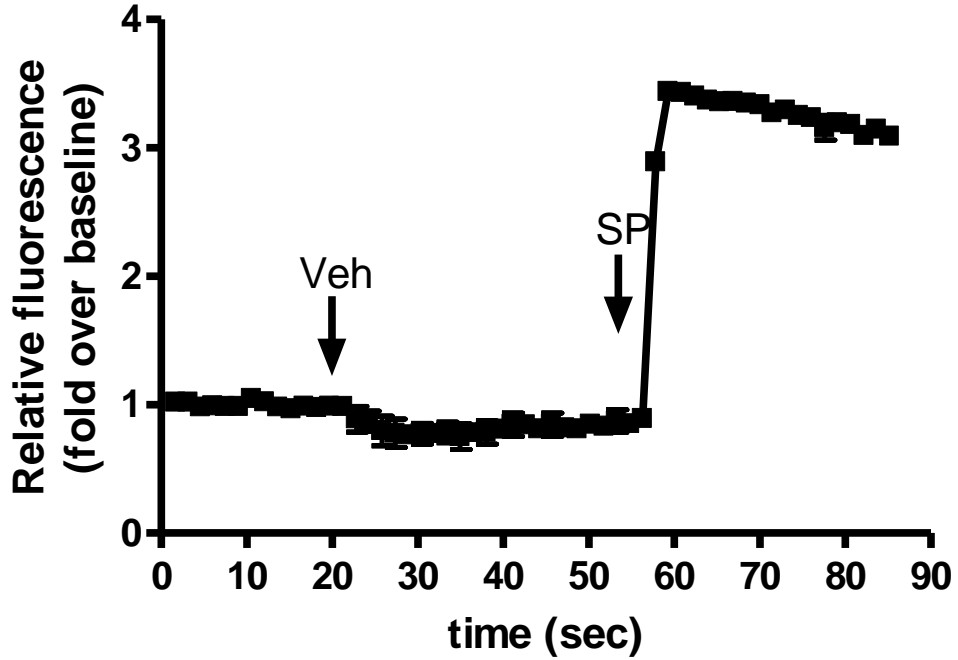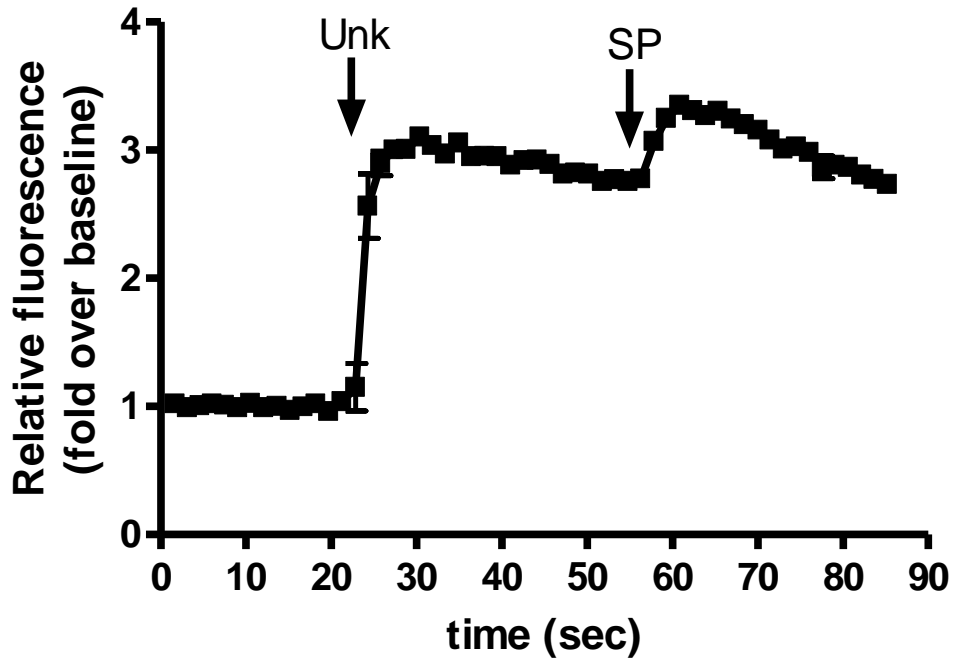

### V1 Receptor Hank's Balanced Salt Solution, 20 mM HEPES, 2.5 mM probenecid

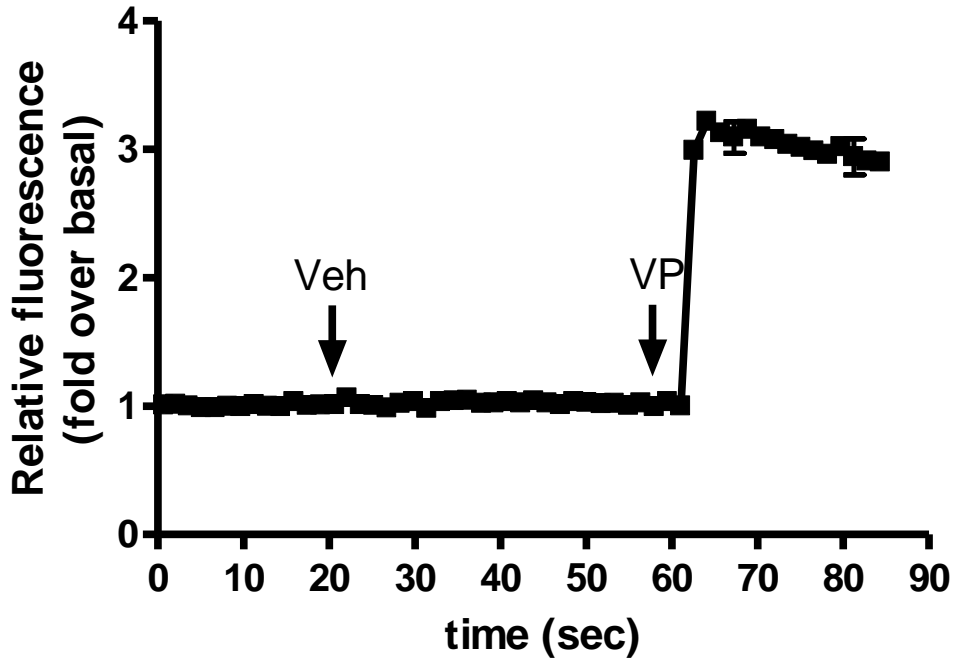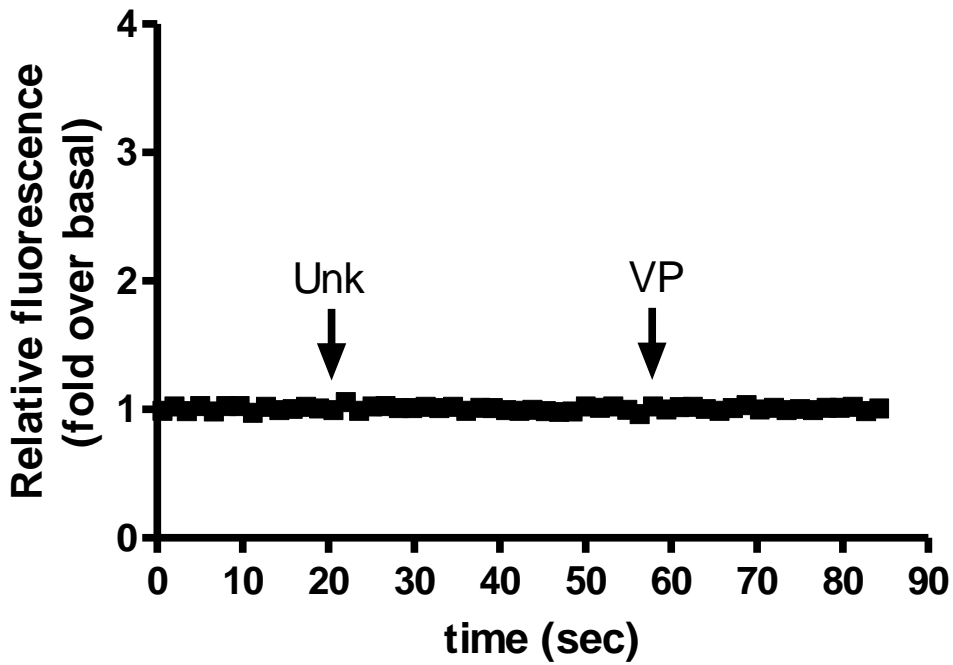

### V2 Receptor Hank's Balanced Salt Solution, 20 mM HEPES, 2.5 mM probenecid

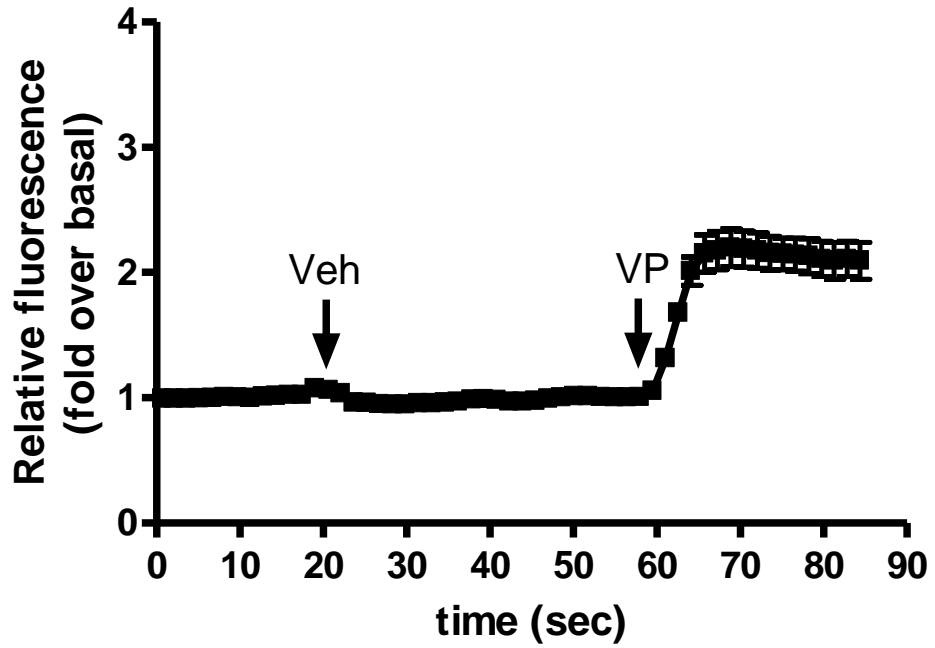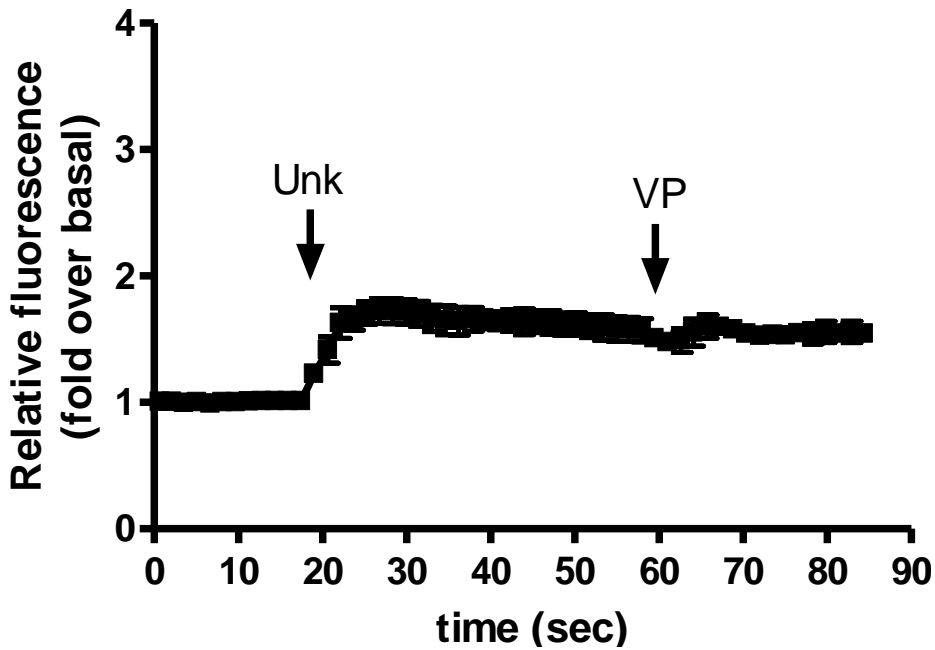

**Figure 20.** Representative antagonist potency determination using the modified Low-Angus method (Christopoulos et al., 1999).

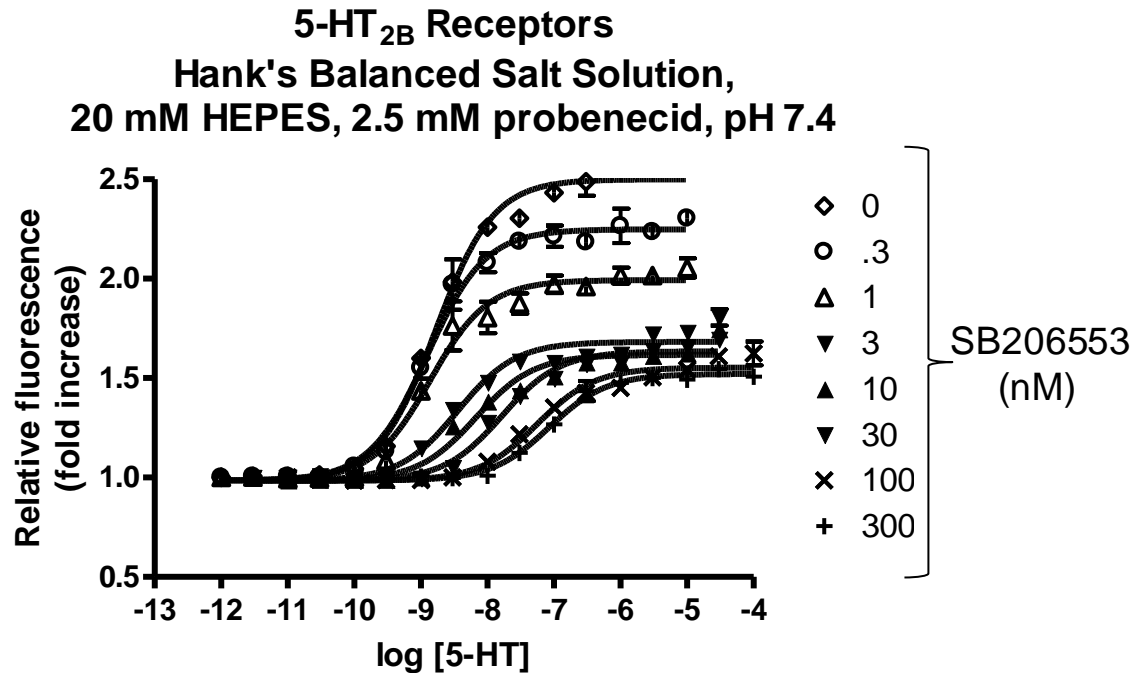

**Modified Low-Angus Method**  
**pK<sub>B</sub> determination for SB206553 potency**  
**at 5-HT<sub>2B</sub> Receptors**

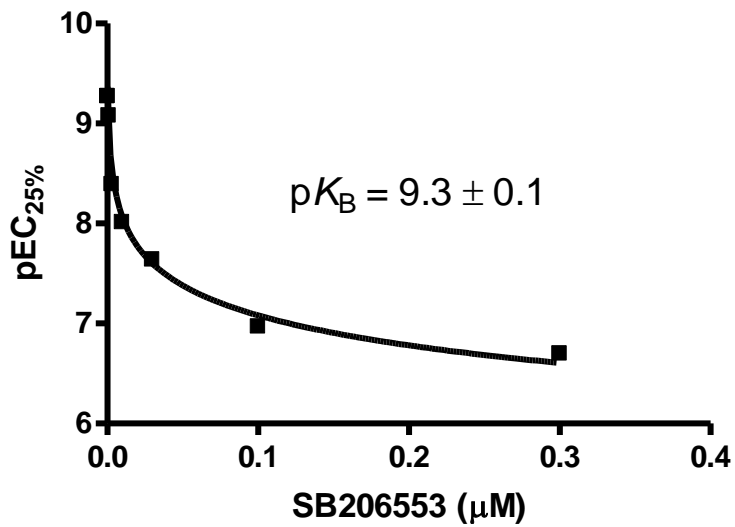

*Gq/11/i9-Coupled Targets: intracellular inositol phosphate accumulation*

Receptors: Glutamate mGluR<sub>1</sub>, mGluR<sub>5</sub>, mGluR<sub>6</sub>

Assay Buffer: LiCl-containing Locke's buffer (156 mM NaCl, 5.6 mM KCl, 3.6 mM NaHCO<sub>3</sub>, 1 mM MgCl<sub>2</sub>, 1.3 mM CaCl<sub>2</sub>, 5.6 mM glucose, and 20 mM HEPES, 20 mM LiCl, pH 7.4)

Protocol adapted from Shi *et al. J Pharmacol Exp Ther* 305(1):131-142 (2003).

Experimental Procedure and Data Analysis:

Compounds are tested using cell lines with stable expression of mGluR receptors in functional assays. The signal transduction assays used in these studies fall in two categories. The first is the assay of PI hydrolysis, used for phospholipase C-coupled receptors. Cells, cultured in 96-well plates to confluency (3 to 4 days), are incubated overnight in glutamine-free culture medium supplemented with 0.5  $\mu$ Ci *myo*-[<sup>3</sup>H]inositol (NEN) to label the cell membrane phosphoinositides. After washing the cultures, incubations with agonist (10  $\mu$ M glutamate) are carried out for 45 min at 37 degrees centigrade in Locke's buffer (156 mM NaCl, 5.6 mM KCl, 3.6 mM NaHCO<sub>3</sub>, 1 mM MgCl<sub>2</sub>, 1.3 mM CaCl<sub>2</sub>, 5.6 mM glucose, and 20 mM HEPES, pH 7.4) containing 20 mM LiCl to block the degradation of inositol phosphates (IPs). The reaction is terminated by aspiration, and IPs are extracted with 0.1 M HCl. The separation of [<sup>3</sup>H]IPs is performed by anion exchange chromatography. This assay is used with CHO cells expressing mGluR<sub>1</sub> and mGluR<sub>5</sub> receptors, but also with CHO cell lines expressing mGluR<sub>8</sub> receptors. This cell line was created by co-transfection of a chimeric G protein (G<sub>q19</sub>) that allows the coupling of these receptors to phospholipase C and, hence, measurements of PI hydrolysis. All of these studies are performed in the absence and in the presence of agonists appropriate for the different mGluRs and used at concentrations equivalent to their EC<sub>50</sub> values. Hence, 15  $\mu$ M and 5  $\mu$ M glutamate is used for mGluR<sub>1</sub> and mGluR<sub>5</sub>, respectively, while 0.5  $\mu$ M 4-aminophosphonobutyrate (AP4) is used for mGluR<sub>6</sub>.

**Primary assays - Single concentration assays.** Each new compound is tested on all receptors at a single concentration (to be agreed upon, usually 10  $\mu$ M) for activity as an agonist or an antagonist. Testing for antagonism is performed in presence of the EC<sub>50</sub> concentration of a typical agonist (as described above). Each compound is tested in duplicate in two separate experiments performed on different cell passages. In addition to the tested compounds each 96-well plate contains points for determination of basal activity, maximal agonist stimulation, agonist EC<sub>50</sub> concentrations (i.e., concentration-response isotherm), and the IC<sub>50</sub> concentration of a known antagonist for purposes of positive control and for activity calculations. The reported results for each compound are calculated for agonists as the per cent of maximal activity (as obtained with maximal agonist concentrations) and for antagonist as the percent of inhibition of receptor activity

(in presence of an EC<sub>50</sub> concentration of the agonist). Results are expressed as means ± SEM from four replications.

**Secondary assays - Concentration-response assays.** Compounds determined to be active as agonists or antagonists may be tested for their potency in concentration-response experiments. Six-point concentration-response curves are performed in duplicate twice on two separate passages of cells (sometimes a third curve may be needed if in the first experiment the range of concentrations used is outside of the active range). For antagonists these curves are performed in the presence of the EC<sub>50</sub> concentration of the agonist. For each compound the results from four replications are averaged and then either EC<sub>50</sub> or IC<sub>50</sub> values are calculated by non-linear regression using the 4-parameter logistic equation. Results are reported as EC<sub>50</sub> or IC<sub>50</sub> values for each tested compound (and receptor) and also include the EC<sub>50</sub> or IC<sub>50</sub> values of a known agonist or antagonist for comparison purposes.

**Figure 21.** Representative intracellular inositol phosphate accumulation concentration-response isotherms for Gq/11/i9-coupled metabotropic glutamate receptors.

mGluR<sub>1</sub>  
Agonism

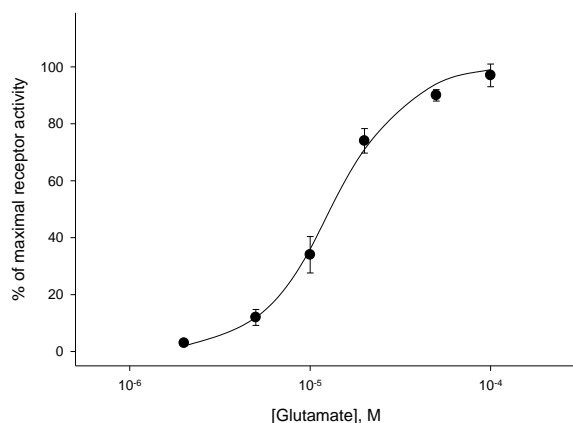

Antagonism

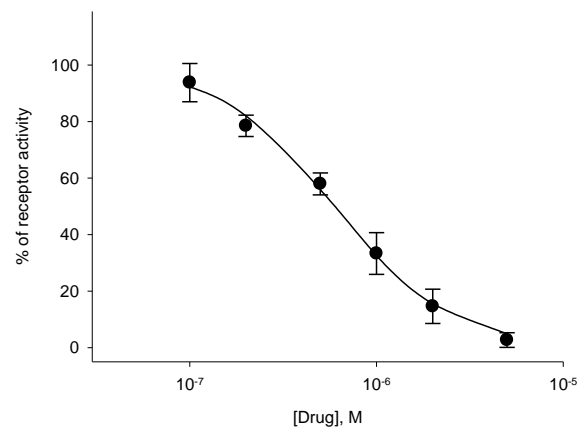

mGluR<sub>5</sub>  
Agonism

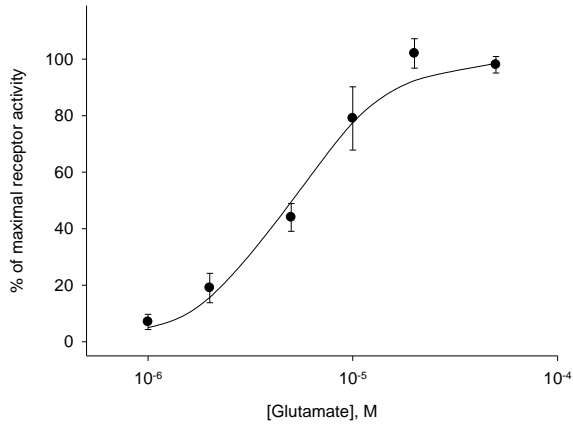

Antagonism

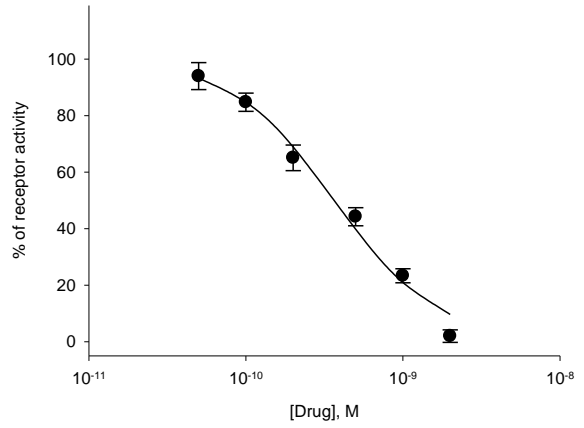

mGluR<sub>6</sub>  
Agonism

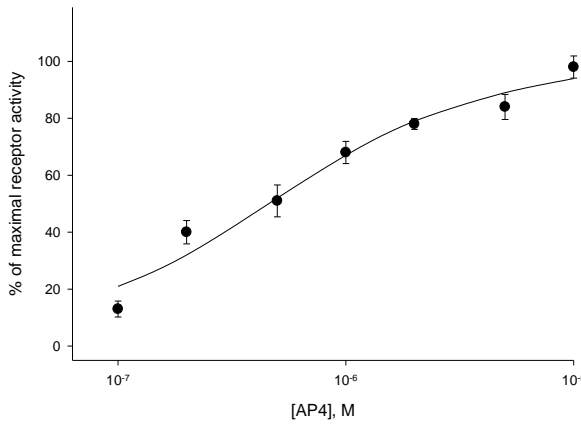

Antagonism

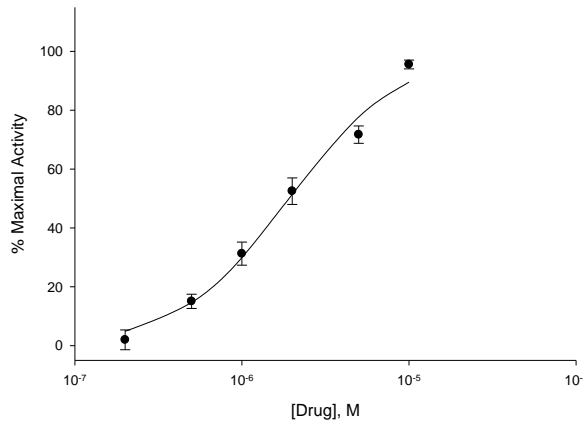



*Gi-Coupled Targets: inhibition of forskolin-stimulated intracellular cAMP accumulation*

Receptors: Glutamate mGluR<sub>2</sub>, mGluR<sub>4</sub>, mGluR<sub>8</sub>

Assay Buffer: IBMX-containing Locke's buffer (156 mM NaCl, 5.6 mM KCl, 3.6 mM NaHCO<sub>3</sub>, 1 mM MgCl<sub>2</sub>, 1.3 mM CaCl<sub>2</sub>, 5.6 mM glucose, and 20 mM HEPES, 300 μM IBMX, pH 7.4)

Protocol adapted from Shi *et al. J Pharmacol Exp Ther* 305(1):131-142 (2003).

#### Experimental Procedure and Data Analysis:

The second type of glutamate receptor functional assays consists of measurements of cAMP formation and is used with receptors negatively coupled to adenylyl cyclase. These are mGluR<sub>2</sub> and mGluR<sub>6</sub> receptors expressed in CHO cells and mGluR<sub>4</sub> receptors expressed in BHK cells. The activity of agonists at these receptors is determined by measurements of their ability to decrease the forskolin-induced elevation of cyclic AMP formation. Cells cultured in 96-well culture plates are preincubated for 10 min at 37 degrees centigrade in Locke's medium containing 300 μM isobutylmethylxanthine to inhibit the activity of phosphodiesterases which degrade cAMP. Then 5 μM forskolin is added without or with mGluR agonists, and the incubation is continued for 10 min. After the incubation, the medium is rapidly aspirated and cAMP is extracted with 0.1 M HCl and measured by radioimmunoassay using a magnetic Amerlex RIA kit (Amersham). All of these studies are performed in the absence and in the presence of agonists appropriate for the different mGluRs and used at concentrations equivalent to their EC<sub>50</sub> values. Hence, 1 μM glutamate is used for mGluR<sub>2</sub>, while 0.5 μM and 1 μM 4-aminophosphonobutyrate (AP4) are used for mGluR<sub>4</sub> and mGluR<sub>8</sub>, respectively.

**Primary assays - Single concentration assays.** Each new compound is tested on all receptors at a single concentration (to be agreed upon, usually 10 μM) for activity as an agonist or an antagonist. Testing for antagonism is performed in presence of the EC<sub>50</sub> concentration of a typical agonist (as described above). Each compound is tested in duplicate in two separate experiments performed on different cell passages. In addition to the tested compounds, each 96-well plate contains points for the determination of basal activity, maximal agonist stimulation, agonist EC<sub>50</sub> concentrations (i.e., concentration-response isotherm), and the IC<sub>50</sub> concentration of a known antagonist for purposes of positive control and for activity calculations. The reported results for each compound are calculated for agonists as the per cent of maximal activity (as obtained with maximal agonist concentrations) and for antagonist as the percent of inhibition of receptor activity (in presence of an EC<sub>50</sub> concentration of the agonist). Results are expressed as means ± SEM from four replications.

**Secondary assays - Dose-response assays.** Compounds determined to be active as agonists or antagonists may be tested for their potency in dose-response experiments. Six-point dose-response curves are performed in duplicate twice on two separate passages of cells (sometimes a third curve may be needed if in the first experiment the range of concentrations used is outside of the active range). For antagonists these curves are performed in the presence of the EC<sub>50</sub> concentration of the agonist. For each compound the results from four replications are averaged and then either EC<sub>50</sub> or IC<sub>50</sub> values are calculated by non-linear regression using the 4-parameter logistic equation. Results are reported as EC<sub>50</sub> or IC<sub>50</sub> values for each tested compound (and receptor) and also include the EC<sub>50</sub> or IC<sub>50</sub> values of a known agonist or antagonist for comparison purposes.

**Figure 22.** Representative inhibition of forskolin-stimulated intracellular cAMP accumulation concentration-response isotherms for Gi-coupled metabotropic glutamate receptors.

mGluR<sub>2</sub>  
Agonist

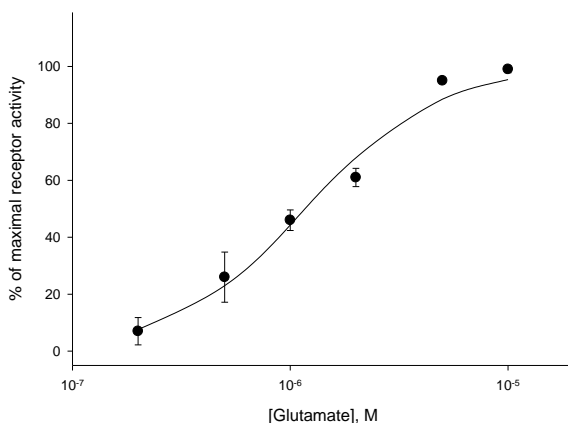

Antagonist

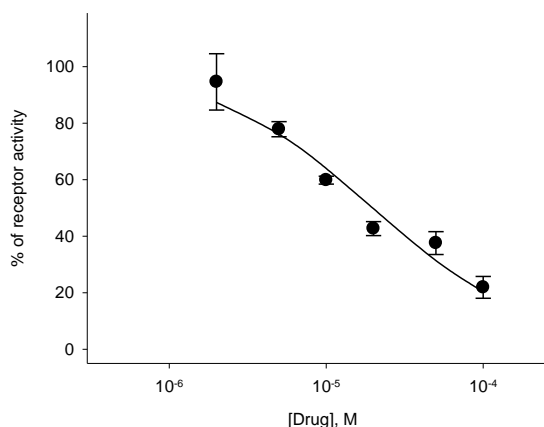

mGluR<sub>4</sub>  
Agonist

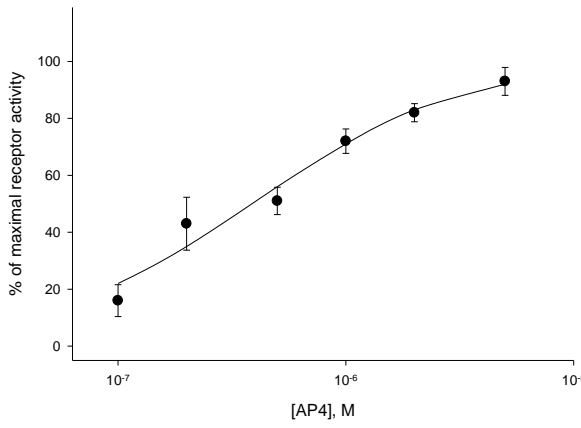

Antagonist

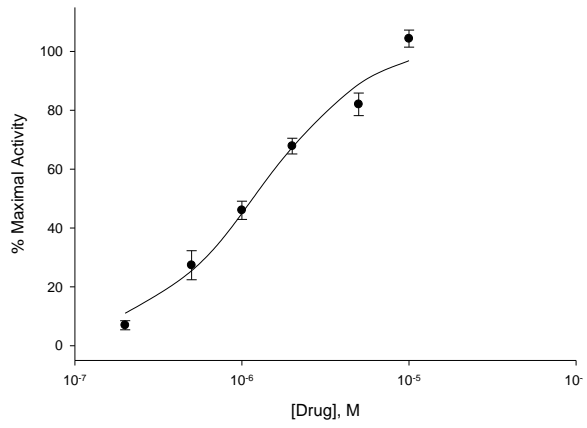

mGluR<sub>8</sub>  
Agonist

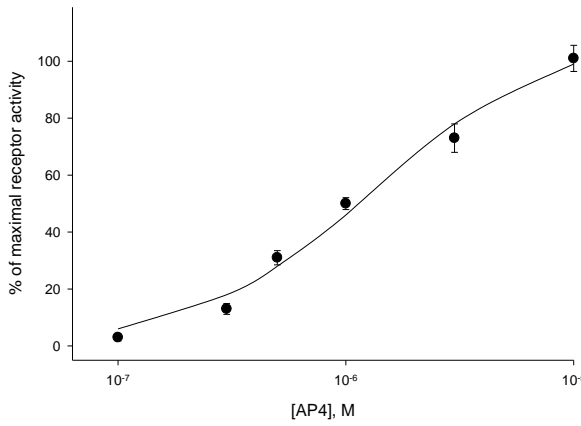

Antagonist

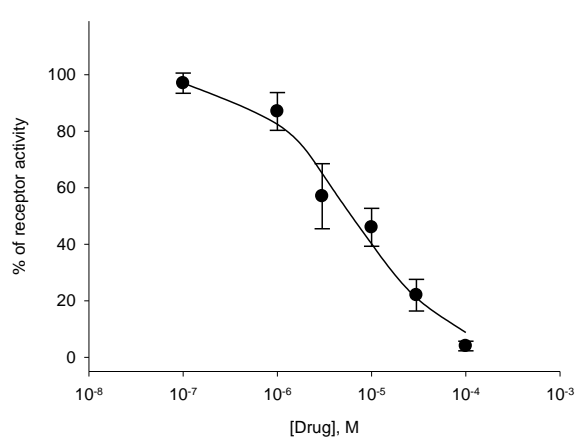

*Gs-Coupled Targets: intracellular cAMP accumulation*

Receptors: Serotonin 5-HT<sub>6</sub>, 5-HT<sub>7</sub>; Dopamine D<sub>1</sub>, D<sub>5</sub>; Norepinephrine β<sub>1</sub>, β<sub>2</sub>, β<sub>3</sub>

Assay Buffer: 1X Krebs-Ringer bicarbonate glucose buffer, 0.75 mM IBMX, pH 7.4

Protocol adapted from Jensen *et al. Neuropsychopharmacology* 5 Dec (2007).

Experimental Procedure and Data Analysis:

Receptor-expressing cell lines are seeded in 96-well, poly-L-lysine-coated plates 48 hours prior to the assay (40,000 cells per well) in DMEM containing 5% dialyzed serum. Twenty hours prior to the assay, the medium is changed to serum-free DMEM. On the day of the assay, the DMEM is washed and replaced with 30 µl of assay buffer. A 10-min pre-incubation is performed in a 37-degree centigrade, humidified incubator. Then, the cells are stimulated by addition of 30 µl of 2X dilutions of test or reference compound (final concentrations ranging from 0.1 nM to 10 µM, each concentration assayed in triplicate). A positive control (100 µM forskolin) is also included. Accumulation of cAMP is allowed to continue for 15 min, after which the buffer is removed and the cells are lysed with Cell Lysis Buffer (CatchPoint cAMP Assay Kit, Molecular Devices). Next, the lysates are transferred to 96-well, glass-bottom plates coated with goat anti-rabbit IgG and adsorbed with rabbit anti-cAMP (Molecular Devices). Following a 5-min incubation, horseradish peroxidase-cAMP conjugate is added (Molecular Devices) and a 2-hour incubation is performed at room temperature. Then, after three washes with Wash Buffer (Molecular Devices), Stoplight Red substrate (Molecular Devices), reconstituted in Substrate Buffer (Molecular Devices) containing freshly-added 1 mM H<sub>2</sub>O<sub>2</sub>, is added and, after a 15-min incubation at room temperature, fluorescence is measured (excitation 510-545 nm, emission 565-625 nm). For each assay, a cAMP calibration curve is generated and controls without lysate and without antibody are included.

For agonist tests, raw data (maximum fluorescence, fluorescence units) for each concentration of test compound or reference agonist are normalized to the basal (vehicle-stimulated) fluorescence (reported as fold increase over basal) and plotted as a function of the logarithm of the molar concentration of the drug (*i.e.*, test or reference compound). Non-linear regression of the normalized data is performed in Prism 4.0 (GraphPad Software) using the built-in three parameter logistic model (*i.e.*, sigmoidal concentration-response) describing agonist-stimulated activation of one receptor population:

$$y = \text{bottom} + [(\text{top} - \text{bottom}) / (1 + 10^{\text{x} - \log \text{EC}_{50}})]$$

where bottom equals the best-fit basal fluorescence and top equals the best-fit maximal fluorescence stimulated by the test compound or reference agonist. The

$\log EC_{50}$  (i.e., the log of the drug concentration that increases fluorescence by 50% of the maximum fluorescence observed for the test compound or reference agonist) is thus estimated from the data, and the  $EC_{50}$  (agonist potency) is obtained. To obtain an estimate of the relative efficacy of the test compound (Rel.  $E_{max}$ ), its best-fit top is compared to and expressed as a ratio of that for the reference agonist (Rel.  $E_{max}$  of the reference agonist is 1.00).

To ascertain whether test compounds are antagonists, a double-addition paradigm similar to that used in calcium mobilization assays is employed. First, 30  $\mu$ l of test compound (20  $\mu$ M) is added (10  $\mu$ M final concentration) and a 15-min incubation is performed. Then, 30  $\mu$ l of reference agonist (3X;  $EC_{90}$ ) is added (final concentration of agonist is  $EC_{30}$ ) and cAMP accumulation is allowed to proceed for 15 min. The samples are then processed for cAMP measurements as detailed above. Measurements of reference agonist-induced cAMP accumulation are compared to the signals elicited by the reference agonist following addition of vehicle instead of test compound and expressed as a ratio. 'Hits' (compounds that antagonize reference agonist-stimulated increases in baseline-normalized fluorescence by at least 50%) are then characterized by a modified Schild analysis.

For modified Schild analysis, a family of reference agonist concentration-response isotherms is generated in the absence and presence of graded concentrations of test compound (added 15 min prior to reference agonist). Theoretically, compounds that are competitive antagonists cause a dextral shift of agonist concentration-response isotherms without reducing the maximum response to agonist (i.e., surmountable antagonism). However, on occasion, factors such as non-competitive antagonism, hemiequilibria, and/or receptor reserve cause apparent insurmountable antagonism. To account for such deviations, we apply the modified Lew-Angus method to ascertain antagonist potency (Christopoulos et al., 1999). Briefly, equieffective concentrations of agonist (concentrations of agonist that elicit a response equal to the  $EC_{25\%}$  of the agonist control curve) are plotted as a function of the test compound concentration present in the wells in which they were measured. Non-linear regression of the baseline-normalized data is performed in Prism 4.0 using the following equation:

$$pEC_{25\%} = -\log ([B] + 10^{-pK}) - \log c$$

where  $EC_{25\%}$  equals the concentration of agonist that elicits a response equal to 25% of the maximum agonist control curve response and  $[B]$  equals the antagonist concentration;  $K$ ,  $c$ , and  $s$  are fit parameters. The parameter  $s$  is equal to the Schild slope factor. If  $s$  is not significantly different from unity,  $pK$  equals  $pK_B$ ; otherwise,  $pA_2$  is calculated ( $pA_2 = pK/s$ ). The parameter  $c$  equals the ratio  $EC_{25\%}/[B]$ .

**Figure 23.** Representative cAMP accumulation isotherms for reference compounds and NIMH-PDSP investigator-submitted unknowns at selected Gs-coupled receptors available for screening.

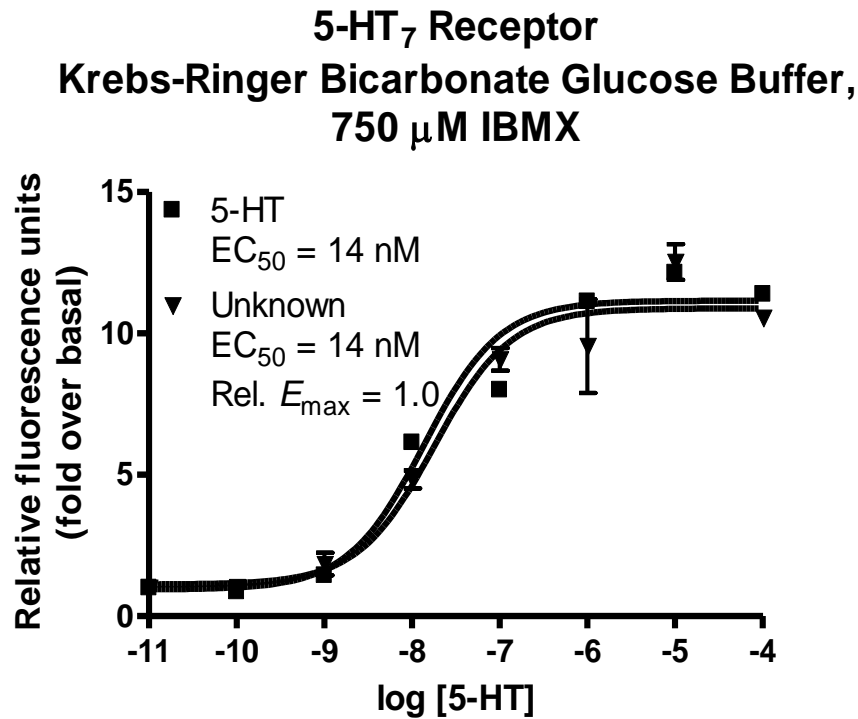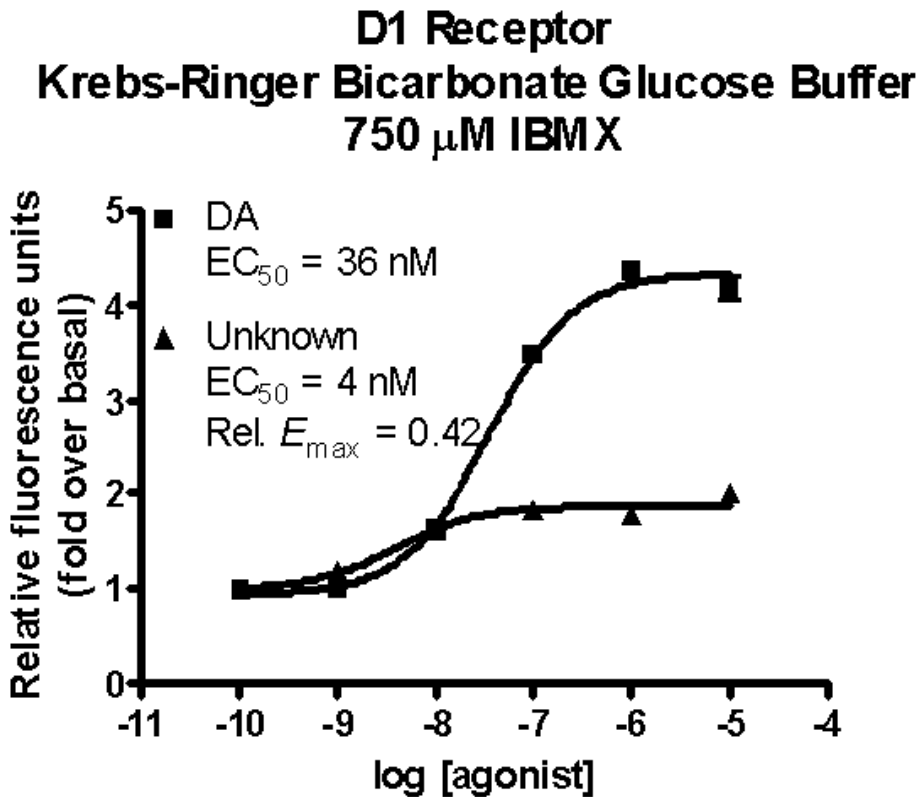

**D5 Receptor**  
**Krebs-Ringer Bicarbonate Glucose Buffer**  
**750  $\mu$ M IBMX**

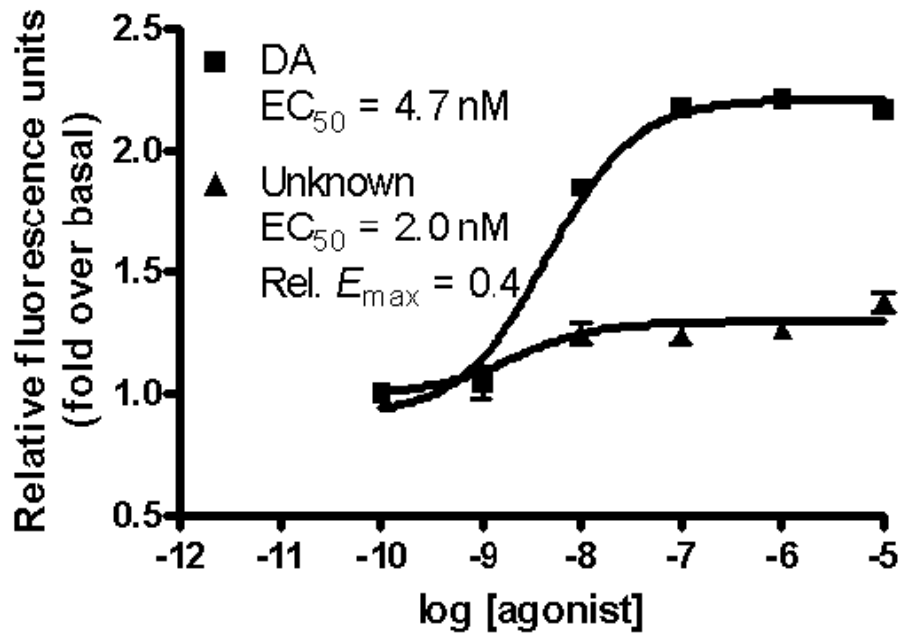

*Monoamine transporters: inhibition of [<sup>3</sup>H]monoamine uptake*

Transporters: Serotonin 5-HT transporter (SERT); Dopamine transporter (DAT); Norepinephrine transporter (NET)

Assay Buffer: 1X Krebs-Ringer HEPES glucose buffer, 0.1 mM ascorbate, 0.1 mM pargyline, 0.1 mM tropolone (DAT and NET assays only), pH 7.4

Protocol adapted from Jensen *et al. Neuropsychopharmacology* 5 Dec (2007).

Experimental Procedure and Data Analysis:

Transporter-expressing cell lines are seeded in 96-well, poly-L-lysine-coated plates 48 hours prior to the assay (40,000 cells per well) in DMEM containing 5% dialyzed serum. Twenty hours prior to the assay, the medium is changed to serum-free DMEM. On the day of the assay, the DMEM is washed and replaced with 30 µl of assay buffer containing vehicle or dilutions of test or reference compound (final concentrations ranging from 0.1 nM to 10 µM, each concentration assayed in triplicate). A 10-min pre-incubation is performed in a 37-degree centigrade, humidified incubator. Then, monoamine transport is initiated by addition of 30 µl of 2X [<sup>3</sup>H]monoamine, the specific activity of which is diluted 10- to 50-fold with non-labeled monoamine (final assay concentration of [<sup>3</sup>H]monoamine is 1 µM). Uptake of [<sup>3</sup>H]monoamine is allowed to proceed for 4 min, after which the buffer is aspirated and the cells are washed three times with ice-cold buffer containing 10 µM paroxetine (for SERT), GBR12909 (for DAT), or nisoxetine (for NET). Then, polystyrene-compatible scintillation cocktail (Microscint PS, PerkinElmer; 50 µl/well) is added and the plates are sealed and agitated on an orbital shaker at a high setting for 5 min. The plates are then counted in a Wallac MicroBeta TriLux scintillation counter.

Raw data (dpm) representing total [<sup>3</sup>H]monoamine uptake (*i.e.*, specific + non-specific uptake) are plotted as a function of the logarithm of the molar concentration of the competitor (*i.e.*, test or reference compound). Non-linear regression of the normalized (*i.e.*, percent of [<sup>3</sup>H]monoamine uptake relative to that observed in the absence of test or reference compound) raw data is performed in Prism 4.0 using the built-in three parameter logistic model describing competitive inhibition (one-site):

$$y = \text{bottom} + [(\text{top} - \text{bottom}) / (1 + 10^{x - \log \text{IC}_{50}})]$$

where bottom equals the best-fit non-specific [<sup>3</sup>H]monoamine uptake (*i.e.*, non-specific uptake) and top equals the best-fit total [<sup>3</sup>H]monoamine uptake (*i.e.*, uptake absent any competitor). The log IC<sub>50</sub> (*i.e.*, the log of the test or reference compound concentration that reduces [<sup>3</sup>H]monoamine uptake binding by 50%) is thus estimated from the data and used to obtain the K<sub>i</sub> by applying the Cheng-Prusoff approximation:



$$K_i = IC_{50}/(1 + [\text{monoamine}]/K_M)$$

where [monoamine] equals the assay [ $^3\text{H}$ ]monoamine concentration and  $K_M$  equals the affinity constant of the monoamine for the transporter.

**Figure 24.** Representative [ $^3\text{H}$ ]monoamine uptake inhibition isotherms for reference compounds and NIMH-PDSP investigator-submitted unknowns.

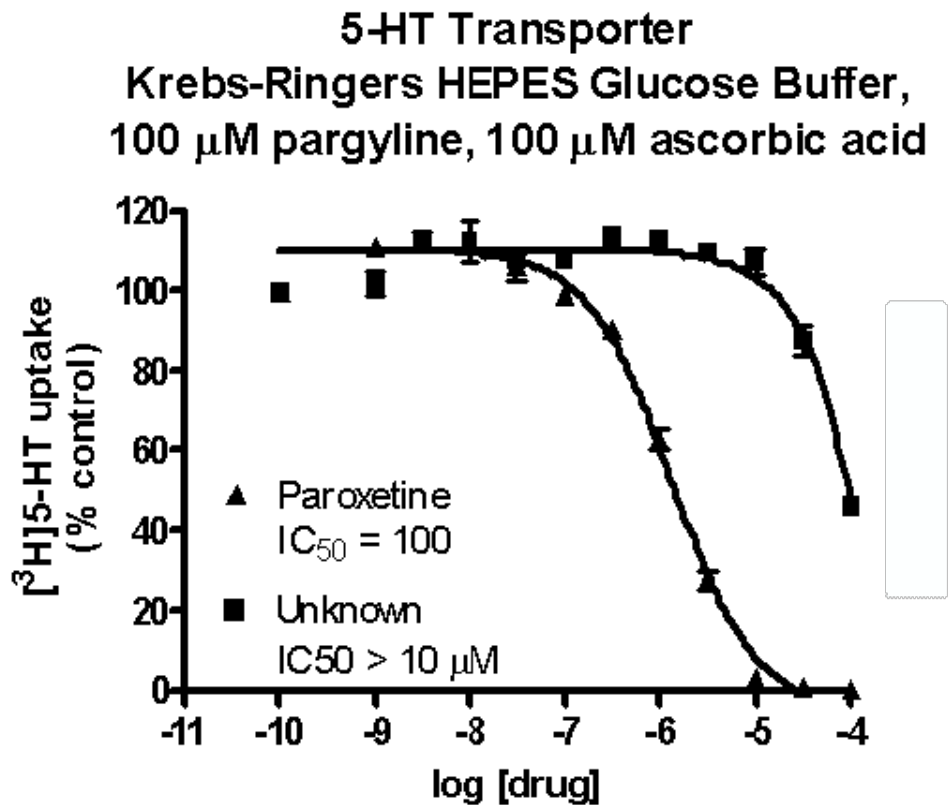

**Norepinephrine Transporter**  
**Krebs-Ringers HEPES Glucose Buffer,**  
**100  $\mu$ M pargyline, 100  $\mu$ M ascorbic acid**

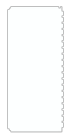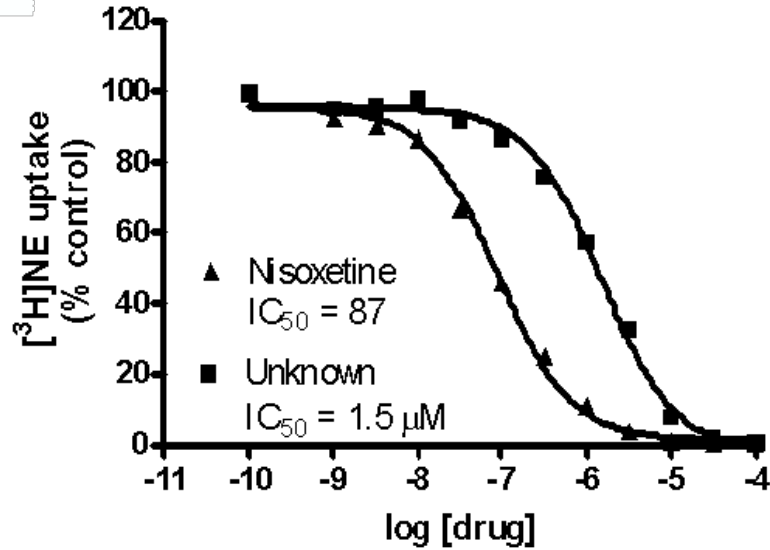

**Dopamine Transporter**  
**Krebs-Ringers HEPES Glucose Buffer,**  
**100  $\mu$ M pargyline, 100  $\mu$ M ascorbic acid**

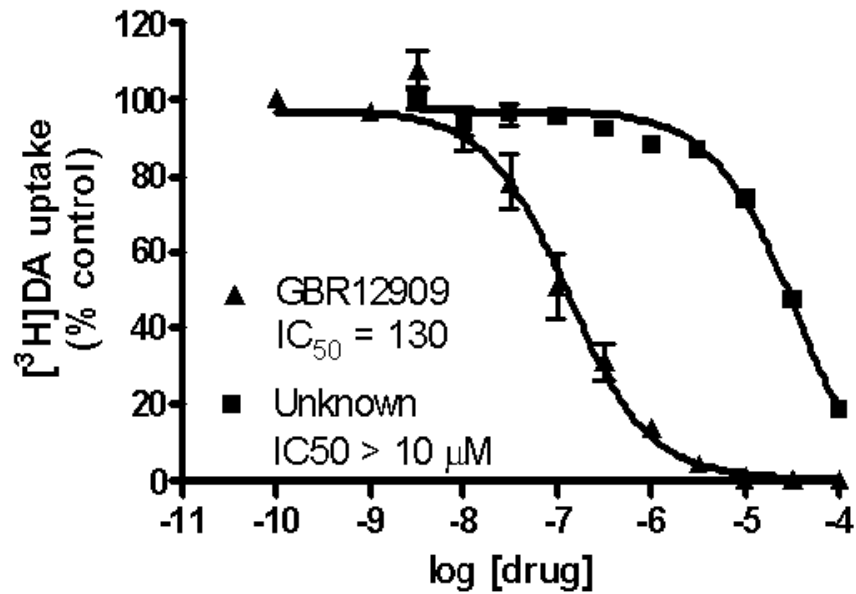

*Other functional assays*

## Histone Deacetylase (HDAC) Inhibition Assay

Assay Buffer: HDAC Assay Buffer (50 mM Tris-HCl, 137 mM NaCl, 2.7 mM KCl, 1 mM MgCl<sub>2</sub>, pH 8.0)

Protocol adapted from BioMol Fluor de Lys product insert.

Experimental Procedure and Data Analysis:

To identify potential inhibitors of HDAC, we utilize the fluorimetric Fluor de Lys HDAC Assay Kit from Biomol as instructed by the manufacturer. Briefly, 4X dilutions of test compound or reference compound (trichostatin A) are prepared (final assay concentrations span from 0.1 nM to 10 μM) in Assay Buffer and 12.5 μl are added to the wells of a 96-well plate (particular to this assay; Biomol). Nuclear extracts containing HDAC activity (procured from Biomol) are diluted to 4X and 12.5 μl are added to the wells containing test or reference compound (each concentration assayed in triplicate). The samples are incubated at room temperature for 10 min to equilibrate the temperature. Then, 25 μl of 2X Fluor de Lys HDAC substrate (final HDAC substrate concentration is typically a value between one half its apparent  $K_M$  and the apparent  $K_M$ ; for HDAC1 a concentration of 50 μM is used, for HDAC6 a concentration between 10 and 30 μM is used) are added to each well. Deacetylation of the substrate, which generates a product that can be made fluorescent, is allowed to proceed for 30 min. Next, the reactions are stopped and the fluorescence of the deacetylated product is developed by adding 50 μl of 2X Assay Developer and incubating at room temperature for 15 min. Finally, fluorescence is read on a FLEXStation II plate reader (Molecular Devices) (excitation 350-380 nm, emission 440-460 nm).

Raw data (RFUs) representing deacetylated substrate fluorescence are plotted as a function of the logarithm of the molar concentration of the test or reference compound. Non-linear regression of the normalized (to the fluorescence measured in the absence of HDAC inhibitor and test compound) raw data is performed in Prism 4.0 using the built-in three parameter logistic model describing competitive inhibition (one-site):

$$y = \text{bottom} + [(\text{top} - \text{bottom}) / (1 + 10^{x - \log \text{IC}_{50}})]$$

where bottom equals the best-fit baseline fluorescence (*i.e.*, maximal inhibition of HDAC) and top equals the best-fit maximum fluorescence (*i.e.*, maximum HDAC activity). The log IC<sub>50</sub> (*i.e.*, the log of the test or reference compound concentration that reduces product fluorescence by 50%) is thus estimated from the data and used to obtain the  $K_i$  by applying the Cheng-Prusoff approximation:

$$K_i = \text{IC}_{50} / (1 + [\text{substrate}] / K_M)$$

where [substrate] equals the assay concentration of the substrate and  $K_M$  equals the affinity constant of the substrate for HDAC.

**Figure 25.** Representative HDAC inhibition isotherms for trichostatin A and an NIMH-PDSP investigator-submitted unknown.

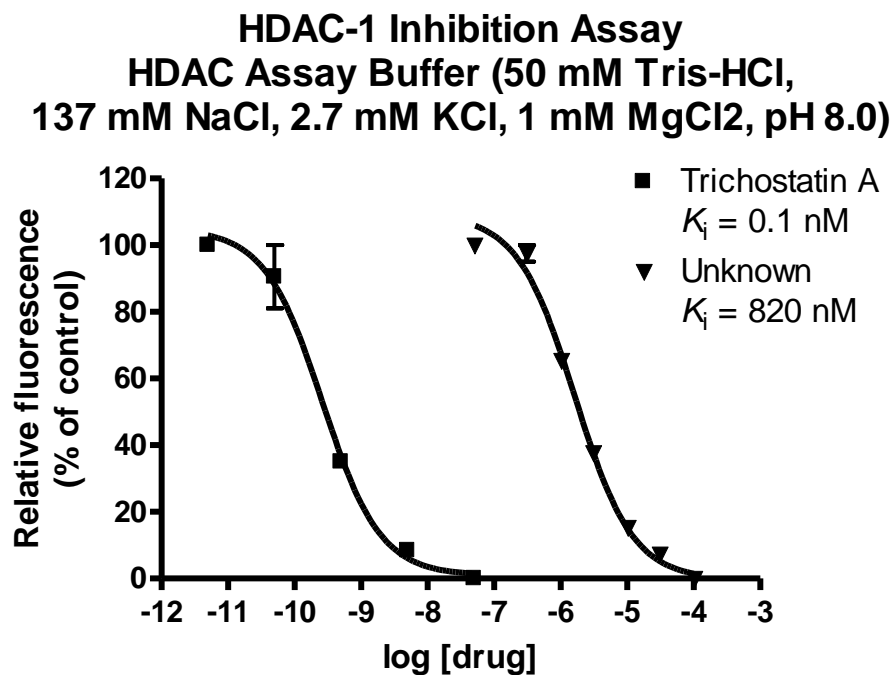

## HERG K<sup>+</sup> Channel Assay

Assay Buffer: Hank's Balanced Salt Solution, 20 mM HEPES, 2.5 mM probenecid, pH 7.4, membrane potential sensitive dye (Molecular Devices)

Protocol adapted from PubChem BioAssay ID 316 (<http://pubchem.ncbi.nlm.nih.gov/assay/assay.cgi?aid=376>).

To screen for drugs that block or open HERG K<sup>+</sup> channels, we employ a fluorescence-based membrane potential assay (Molecular Devices). HEK293 cells stably expressing recombinant human HERG (provided by Dr. J. Overholt, Case Western Reserve University, Cleveland, OH; cells originally from Drs. A. Brown and E. Ficker, MetroHealth Medical Center, Cleveland, OH) are seeded in poly-L-lysine-coated 96-well plates (45,000 cells/100 µl DMEM supplemented with 10% fetal bovine serum/well) one day prior to assay. The next day, the medium is removed and replaced with 30 µl/well of assay buffer containing membrane potential dye (Molecular Devices) (the lyophilized dye is reconstituted with 15 ml of assay buffer). After a 15 min incubation at 37 degrees centigrade, 30 µl/well of 2X dilutions of terfenadine (a known HERG blocker used as a reference compound) or test compound (final assay concentration ranging from 0.1 nM to 10 µM) are added to the cells (each concentration assayed in triplicate). Baseline fluorescence (excitation 530 nM, emission 565 nM) is measured over 15 min, then 140 µl of depolarization solution (143 mM KCl in distilled water) containing test or reference compound (1x) are added to the cells and fluorescence is recorded for 3 min.

Raw fluorescence data are exported to GraphPad Prism 4.0 for further analysis. The last data value measured in each well (i.e., 3 minutes after addition of depolarization solution) is used for analysis, after subtraction of the mean background value obtained in the first 30 seconds before depolarization of the cells. For negative controls, the value obtained using assay buffer alone is defined as 0% HERG blockade, and for positive controls, the value obtained using 10 µM terfenadine is defined as 100% HERG blockade. Negative and positive terfenadine controls are done on each plate. Data from test compounds are scaled as follows:

% HERG blockade for test compound =  $100 \times (\text{value for test compound} - \text{value for negative control}) / (\text{value for } 10 \mu\text{M terfenadine} - \text{value for negative control})$

"Hits" (or "blockers") are defined as those compounds with 20% or greater HERG blockade. HERG "openers" are defined as those compounds with values for HERG blockade < -20%.

**Figure 26.** Representative raw data showing K<sup>+</sup>-induced (50 mM K<sup>+</sup> final) depolarization in HERG-HEK293 cells pretreated with vehicle, terfenadine (10 μM), or an NIMH PDSP investigator-submitted unknown (10 μM) (top panel). Percent blockade (bottom panel) was calculated as described above.

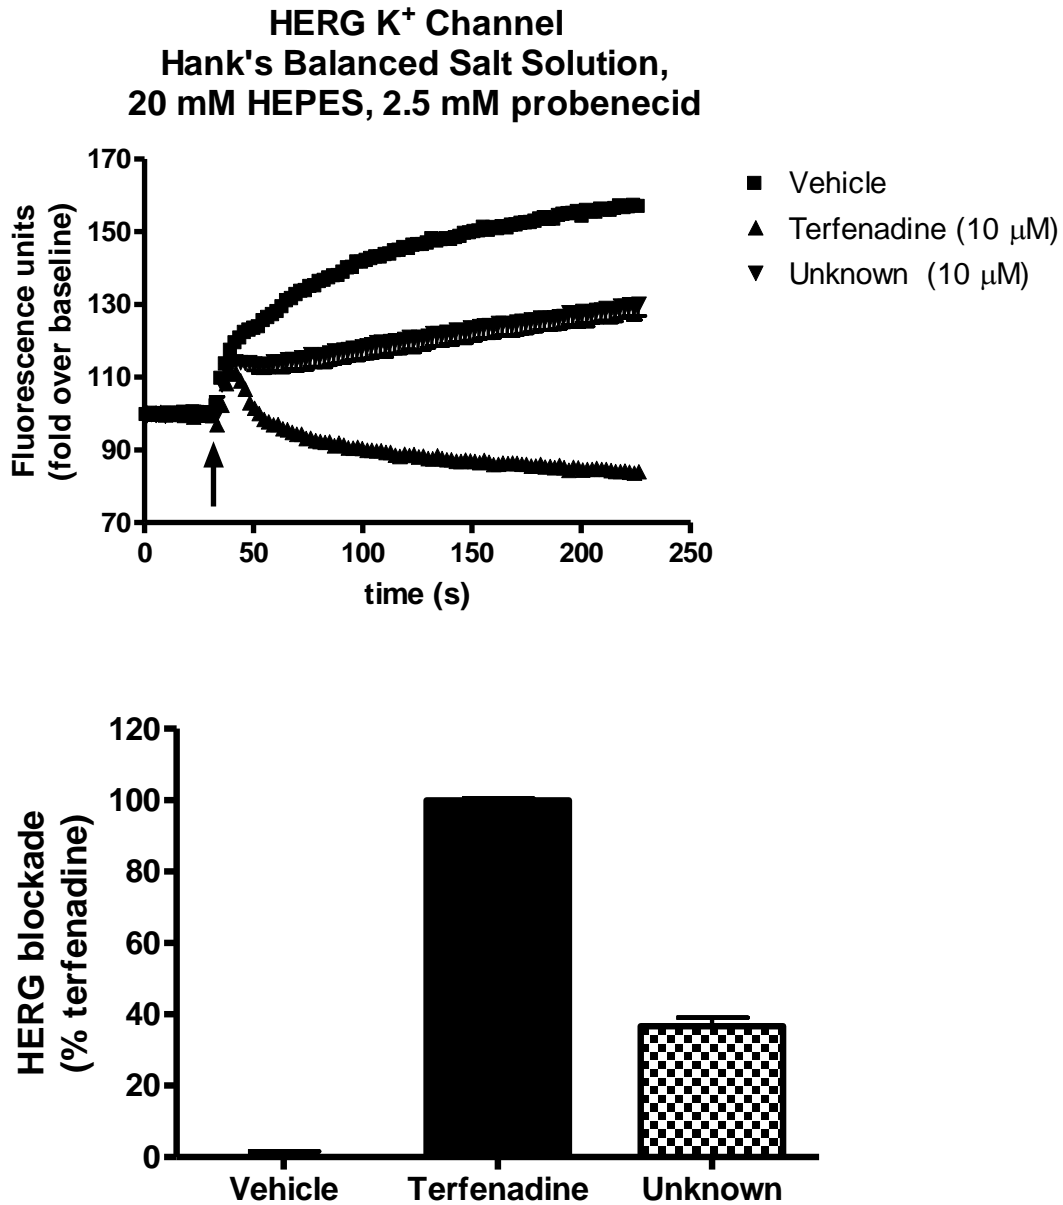

Unknown is a HERG blocker exhibiting  $37 \pm 5$  % blockade relative to terfenadine.

### $^{86}\text{Rb}^+$ Efflux Assay ( $\alpha 3\beta 4$ , $\alpha 4\beta 2$ Nicotinic Receptors)

Assay Buffer: 15 mM HEPES, 140 mM NaCl, 2 mM KCl, 1 mM  $\text{MgSO}_4$ , 1.8 mM  $\text{CaCl}_2$ , 11 mM glucose, pH 7.4

Protocol adapted from Xiao *et al. Mol Pharm* 54(2):322-333 (1998).

Agonist and antagonist activities of reference and test compounds are assayed using cells stably expressing on either the  $\alpha 3\beta 4$  or the  $\alpha 4\beta 2$  receptor subtype (Xiao *et al.*, 1998; Xiao *et al.*, 2006). Cells are grown as described previously (Xiao *et al.*, 1998) in minimum essential medium (MEM) supplemented with 10% fetal bovine serum, 100 units/ml penicillin G, 100  $\mu\text{g}/\text{ml}$  streptomycin, and 0.7 mg/ml of Geneticin (G418) at 37°C with 5%  $\text{CO}_2$  in a humidified incubator. In brief, receptor subtype-expressing cells are seeded into 24-well plates (approximately 100,000 cells per well) coated with poly-D-lysine. The plated cells are grown at 37 degrees centigrade for 18 to 24 so as to reach 70% to 95% confluence. The cells are then incubated in growth medium (0.5 ml/well) containing  $^{86}\text{RbCl}$  (2  $\mu\text{Ci}/\text{ml}$ ) for 4 h at 37°C. The loading mixture is then aspirated, and the cells are washed four times with assay buffer. Next, 1 ml of buffer, with or without dilutions (final assay concentrations typically range from 1 nM to 300  $\mu\text{M}$ ) of test or reference [(-)-nicotine] compounds, is added to each well. For antagonist assays, 100  $\mu\text{M}$  (-)-nicotine is added to the cells along with each dilution (final assay concentrations typically range from 1 nM to 300  $\mu\text{M}$ ) of test and reference (mecamylamine) compounds. After incubation for 2 min, the assay buffer is collected and the amount of  $^{86}\text{Rb}^+$  in the buffer is determined by liquid scintillation counting.  $^{86}\text{Rb}^+$  remaining in the cells is also measured: cells are lysed in 1 ml of 100 mM NaOH per well, then the lysate is collected and its  $^{86}\text{Rb}^+$  content is determined by liquid scintillation counting. For the cells in each well, the total amount of  $^{86}\text{Rb}^+$  loaded (cpm) is calculated as the sum of the  $^{86}\text{Rb}^+$  content in the assay supernatant and in the lysate.  $^{86}\text{Rb}^+$  efflux into the assay supernatant is expressed as a percentage of the total  $^{86}\text{Rb}^+$  loaded (i.e., supernatant  $^{86}\text{Rb}^+$  content plus lysate  $^{86}\text{Rb}^+$  content). Maximal stimulated  $^{86}\text{Rb}^+$  efflux is then defined as the efflux in the presence of 100  $\mu\text{M}$  (-)-nicotine (adjusted to 100%); basal efflux is that measured in the absence of agonist (adjusted to 0%). Typically, basal  $^{86}\text{Rb}^+$  efflux ranges from 3% to 6%, and maximal stimulated efflux is approximately 45%, of the total amount of  $^{86}\text{Rb}^+$  loaded.

For agonists, baseline- and nicotine-normalized data [%  $^{86}\text{Rb}^+$  efflux, with baseline efflux being 0% and 100  $\mu\text{M}$  (-)-nicotine-stimulated efflux being 100%] for each concentration of test compound or (-)-nicotine are plotted as a function of the logarithm of the molar concentration of the drug. Non-linear regression of the normalized data is performed in Prism 4.0 (GraphPad Software) using the built-in three parameter logistic model (i.e., sigmoidal concentration-response) describing agonist-stimulated activation of one receptor population:

$$y = \text{bottom} + [(\text{top}-\text{bottom})/(1 + 10^{x-\log\text{EC}_{50}})]$$

where bottom equals the basal  $^{86}\text{Rb}^+$  efflux (0%) and top equals the maximum  $^{86}\text{Rb}^+$  efflux stimulated by (-)-nicotine (100%). The  $\log \text{EC}_{50}$  [*i.e.*, the log of the drug concentration that increases  $^{86}\text{Rb}^+$  efflux by 50% of the maximum value observed for the test compound or (-)-nicotine] is thus estimated from the data, and the  $\text{EC}_{50}$  (agonist potency) is obtained. To obtain an estimate of the relative efficacy of the test compound (Rel.  $E_{\text{max}}$ ), its best-fit top is compared to and expressed as a ratio of that for (-)-nicotine (Rel.  $E_{\text{max}}$  of the reference agonist is 1.00).

For antagonists, non-specific  $^{86}\text{Rb}^+$  efflux is measured in the presence of 100  $\mu\text{M}$  mecamylamine and is set to 0%; non-specific (-)-nicotine-stimulated  $^{86}\text{Rb}^+$  efflux (*i.e.*, efflux in the absence of antagonist) is set to 100%. Normalized data for each concentration of test compound or mecamylamine are plotted as a function of the logarithm of the molar concentration of the drug. Non-linear regression of the normalized data is performed in Prism 4.0 (GraphPad Software) using the built-in three parameter logistic model (*i.e.*, sigmoidal concentration-response) describing agonist-stimulated activation of one receptor population:

$$y = \text{bottom} + [(\text{top}-\text{bottom})/(1 + 10^{x-\log\text{IC}_{50}})]$$

where bottom equals the basal  $^{86}\text{Rb}^+$  efflux (0%) and top equals the  $^{86}\text{Rb}^+$  efflux stimulated by (-)-nicotine (100%). The  $\log \text{IC}_{50}$  [*i.e.*, the log of the drug concentration that decreases (-)-nicotine-stimulated  $^{86}\text{Rb}^+$  efflux by 50% of the control value (*i.e.*, that measured in the absence of antagonist)] is thus estimated from the data, and the  $\text{IC}_{50}$  (antagonist potency) is obtained.



**Figure 27.** Representative  $^{86}\text{Rb}^+$  efflux concentration-response isotherms for reference compounds and NIMH PDSP investigator-submitted unknowns are shown. Top panel: a representative agonist assay; bottom panel: a representative antagonist assay.

**$\alpha 3\beta 4$  Nicotinic Receptors**  
**15 mM HEPES, 140 mM NaCl,**  
**2 mM KCl, 1 mM MgSO<sub>4</sub>, 1.8 mM CaCl<sub>2</sub>,**  
**11 mM glucose, pH 7.4**

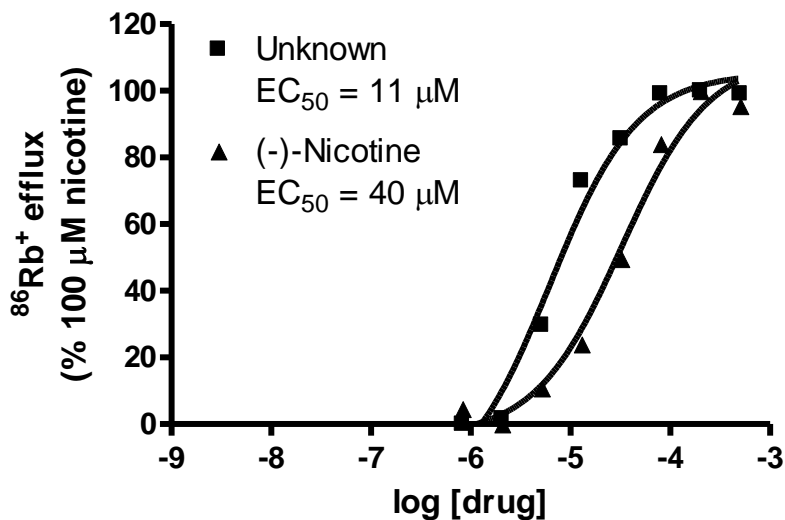

**$\alpha 3\beta 4$  Nicotinic Receptors**  
**15 mM HEPES, 140 mM NaCl,**  
**2 mM KCl, 1 mM MgSO<sub>4</sub>, 1.8 mM CaCl<sub>2</sub>,**  
**11 mM glucose, pH 7.4**

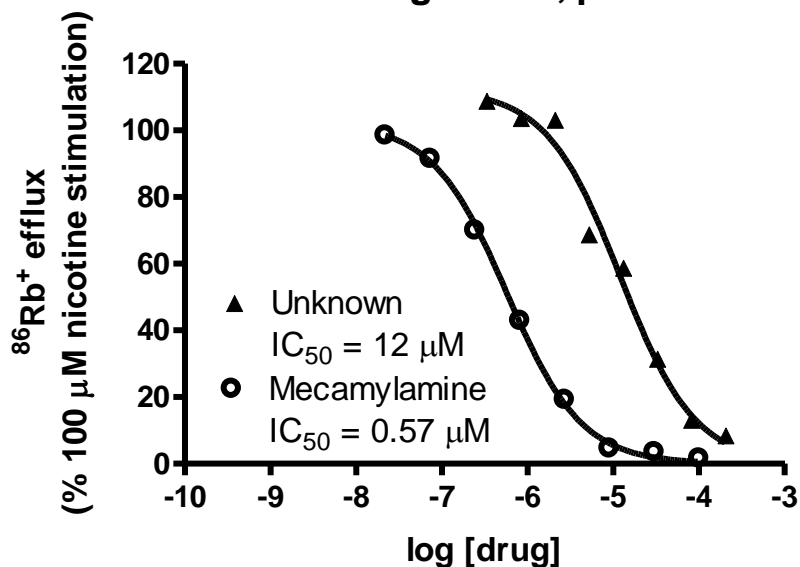

## Multidrug Resistance Transporter (MDR)

Assay Buffer: Dulbecco's PBS, 10 mM glucose

Protocol adapted from PubChem BioAssay ID 377 (<http://pubchem.ncbi.nlm.nih.gov/assay/assay.cgi?aid=377>).

Assays for modulation of MDR activity are performed using Caco-2 cells, a cultured line derived from human colonic epithelium, or HEK human kidney cells that express MDR. The assay relies on calcein acetoxymethyl ester (calcein-AM), a lipophilic compound that enters cells by passive diffusion across the plasma membrane. Once inside cells, esterases can hydrolyze calcein-AM to calcein, which is trapped in the cytoplasm because it is negatively charged. Moreover, calcein is highly fluorescent, but calcein-AM is not.

The assay is based upon the principal that calcein-AM, but not free calcein, is transported from cells by MDR. In cells that express MDR, lipophilic calcein-AM that crosses the plasma membrane will be pumped from the cells before it can be converted to calcein and the accumulation of fluorescence will be low. Compounds that compete with calcein-AM for MDR will prevent calcein-AM transport, resulting in increased conversion to calcein and increased fluorescence. Therefore, the effect of a compound on fluorescence accumulation can be used to measure its interaction with the MDR protein.

The assay monitors the time-dependent increase in calcein fluorescence in live cells in 96 well plates. This is carried out using a FlexStation II fluorimeter (Molecular Devices). Cells are seeded into glass-bottom 96-well plates one day before assay (80,000 cells per well). On the day of the assay, the medium is removed and replaced with 50  $\mu$ l of D-PBS, 10 mM glucose containing no additional compound (negative control), test compound (25  $\mu$ M), or reference compound (cyclosporin A) (25  $\mu$ M). The cells are incubated for 30 min at 37 degrees centigrade, and then the instrument adds calcein-AM to the cells (500 nM final concentration). The instrument monitors fluorescence over a 4-min period and calculates the slope of the fluorescence increase. All compounds are assayed in quadruplicate and each assay contains wells with no test compound (negative control) and wells with 25  $\mu$ M cyclosporin A (positive control), an efficient MDR inhibitor. Results for test compounds are calculated from the slope of the fluorescence increase and are normalized so the value from untreated cells is 0% and the value for cyclosporin A is 100%.

This assay has several features that make it ideal for initial screening of compounds for interaction with MDR. Because the assay is carried out in live cells, compounds must diffuse across lipid bilayers to interact with MDR sites on the cytoplasmic face of the protein. This is similar to the situation in vivo, where compounds must diffuse into the cytoplasm where they interact with MDR.

Similarly, the assay provides a means for assessing not only interactions with MDR but also partitioning across cell membranes and thus hydrophobicity.

Although this assay is excellent for initial screening, users should be aware that the assay has several drawbacks. i) The assay does not distinguish between MDR substrates and inhibitors. Both will give similar signals in the assay because they prevent the transport of calcein-AM. ii) Some compounds may give spurious results by inhibiting the esterases that convert calcein-AM to calcein. Finally (iii) activity depends on the cytoplasmic concentration of the compounds. For a compound that is an MDR substrate, this concentration depends on the rate of diffusion across the plasma membrane and the rate at which MDR pumps the compound from the cells. At steady state, the cytoplasmic concentration will be lower than the extracellular concentration, but it cannot be measured easily. Consequently this assay is not the best choice for determining half-maximal concentrations for interacting compounds.

**Figure 28.** Representative data from an MDR inhibition assay, wherein a reference compound (cyclosporin A) and a NIMH PDSP investigator-submitted unknown were assayed in parallel (25  $\mu$ M final concentration).

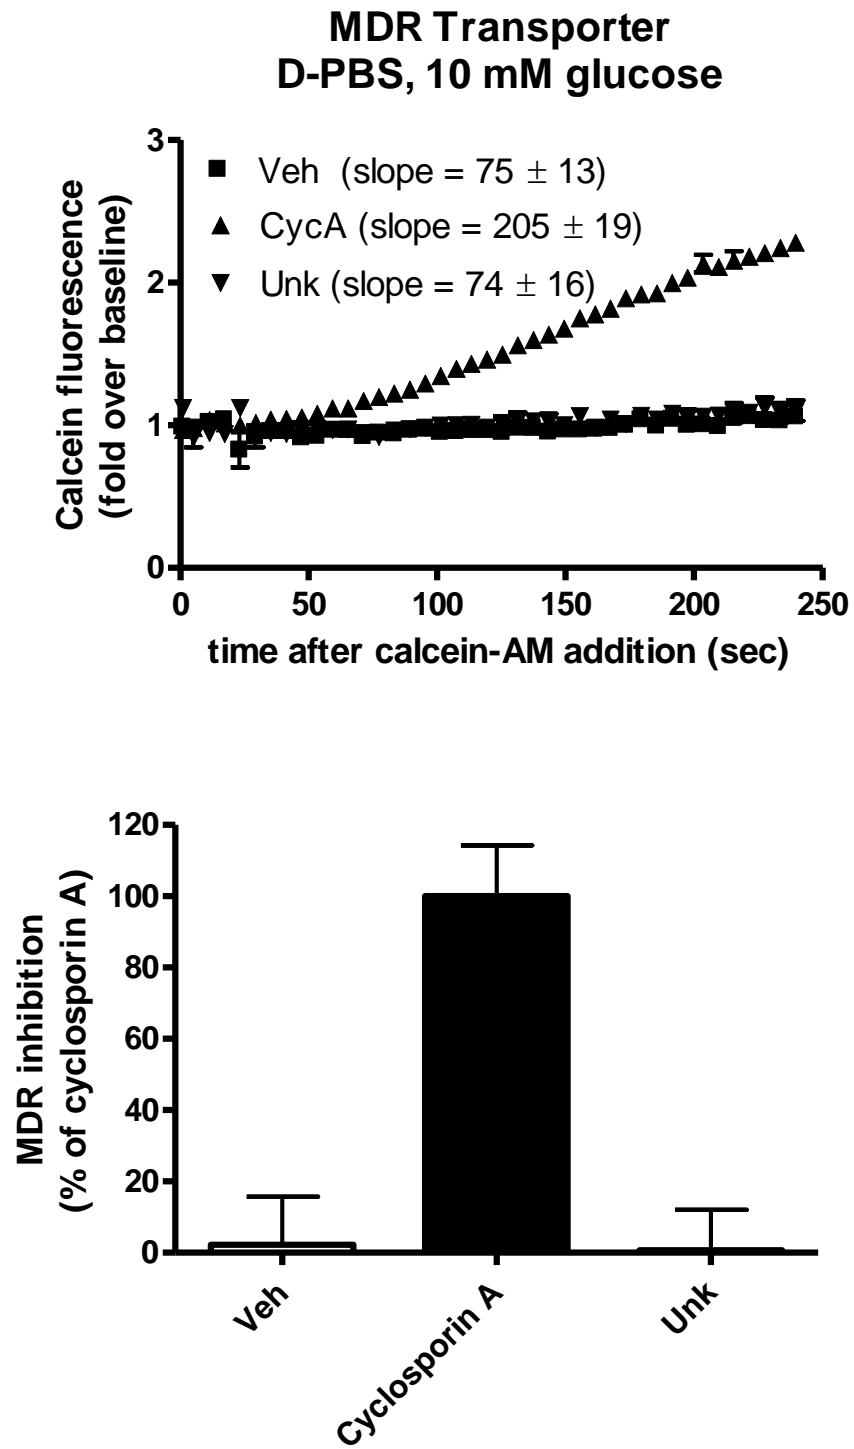

#### IV. Membrane Fraction Preparation

The majority of assays performed by the NIMH PDSP staff employ transfected (primarily stably transfected) cell lines expressing mainly human recombinant receptors, monoamine transporters, or ion channels (ligand-gated and otherwise). A detailed description of the cell lines we use, the culture and sub-culture conditions, the appropriate media, etc. has been prepared by Ms. Hufeisen and can be found in the body of the Statement of Work. What follows here will be a detailed description of the processing of cells from the incubator to the wells of the assay plate.

For binding assays using stably transfected cell lines, cells seeded (using 5% dialyzed fetal bovine serum-supplemented medium) in 10-cm dishes (90% confluent) are incubated overnight in either serum-free medium or medium containing 1% dialyzed fetal bovine serum. The next day, the cells are scraped into the medium and pelleted by centrifugation (1000 x g, 10 min). The cell pellet is resuspended in chilled 50 mM Tris, pH 7.4 (4 degrees) and triturated gently with a P1000 pipette tip to effect hypotonic lysis. The suspension is then centrifuged at 21,000 x g for 20 min to yield a crude membrane fraction pellet. The 50 mM Tris is removed and cells are either frozen on dry ice and maintained at -80 degrees centigrade until assay or resuspended immediately in a desired volume of appropriate assay buffer.

For binding assays using transiently transfected cell lines, cells are transfected as described in the Statement of Work. Twenty-four hours after transfection, the cells are split at an appropriate ratio (typically 1:2 or 1:3) into 10-cm dishes using 5% dialyzed fetal bovine serum-supplemented medium. Then, after overnight growth (generally 90% confluence is reached), the cells are incubated overnight in medium supplemented with no or 1% dialyzed fetal bovine serum. The next day (72 hours after transfection), the cells are scraped and processed as described for stable transfectants.

For binding assays using tissue, crude membrane fractions are prepared from rodent (typically rat) brain or kidney (purchased from PelFreeze Biologicals). Frozen tissue (maintained at -80 degrees centigrade) is thawed on ice, and then homogenized on ice in 10 vol of 50 mM Tris, pH 7.4 containing protease inhibitor cocktail (Roche) using a Polytron homogenizer (3 pulses, each of 10 sec). The homogenate is centrifuged at 40,000 x g for 20 min, and then the resulting supernatant is decanted and replaced with the same buffer. Two to three additional rounds of homogenization-centrifugation are performed to ensure thorough homogenization and also to wash away endogenous ligands (particularly important for GABA assays). The final, washed pellet is resuspended in the same buffer, homogenized one last time, and aliquoted into eppendorf tubes such that one tube contains sufficient material for 24 wells of a binding assay plate (generally 2.5-12.5 mg membrane protein/eppendorf tube, or 100 to 500 µg of membrane protein per well of the binding assay plate). The crude membrane fractions are stored at -80 degrees centigrade until assay, which in most instances is within 3 days of the crude membrane fraction preparation.

**V. Complete List of Research Publications Co-authored or Otherwise Supported by the NIMH PDSP. Detailed validated protocols for all assays can also be found in these peer-reviewed publications**

1. **Abate C, Kolanos R, Dukat M, Setola V, Roth BL, and Glennon RA.** Interaction of chiral MS-245 analogs at h5-HT<sub>6</sub> receptors. *Bioorg Med Chem Lett* 15: 3510-3513, 2005.
2. **Abbas A and Roth B.** Progress towards better understanding and treatment of major psychiatric illnesses. *Drug Discov Today* 10: 960-962, 2005.
3. **Abbas A and Roth BL.** Arresting serotonin. *Proc Natl Acad Sci U S A* 105: 831-832, 2008.
4. **Ablordepey SY, Lyles-Eggleston M, Bricker B, Zhang W, Zhu X, Goodman C, and Roth BL.** Evaluation of the eutomer of 4-{3-(4-chlorophenyl)-3-hydroxypyrrolidin-1-yl}-1-(4-fluorophenyl)butan-1- one, {(+)-SYA 09}, a pyrrolidine analog of haloperidol. *Bioorg Med Chem Lett* 16: 3219-3223, 2006.
5. **Alagille D, Baldwin RM, Roth BL, Wroblewski JT, Grajkowska E, and Tamagnan GD.** Functionalization at position 3 of the phenyl ring of the potent mGluR5 noncompetitive antagonists MPEP. *Bioorg Med Chem Lett* 15: 945-949, 2005.
6. **Alagille D, Baldwin RM, Roth BL, Wroblewski JT, Grajkowska E, and Tamagnan GD.** Synthesis and receptor assay of aromatic-ethynyl-aromatic derivatives with potent mGluR5 antagonist activity. *Bioorganic & Medicinal Chemistry* 13: 197-209, 2005.
7. **Ansonoff MA, Zhang J, Czyzyk T, Rothman RB, Stewart J, Xu H, Zjwiony J, Siebert DJ, Yang F, Roth BL, and Pintar JE.** Antinociceptive and hypothermic effects of Salvinorin A are abolished in a novel strain of kappa-opioid receptor-1 knockout mice. *J Pharmacol Exp Ther* 318: 641-648, 2006.
8. **Armbruster BN, Li X, Pausch MH, Herlitze S, and Roth BL.** Evolving the lock to fit the key to create a family of G protein-coupled receptors potentially activated by an inert ligand. *Proc Natl Acad Sci U S A* 104: 5163-5168, 2007.
9. **Armbruster BN and Roth BL.** Mining the receptorome. *J Biol Chem* 280: 5129-5132, 2005.
10. **Beeler AB, Acquilano DE, Su Q, Yan F, Roth BL, Panek JS, and Porco JA.** Synthesis of a Library of Complex Macrocyclides Employing Cyclodimerization of Hydroxy Esters. *J Comb Chem* 7: 673-681, 2005.
11. **Beguin C, Potter DN, Dinieri JA, Munro TA, Richards MR, Paine TA, Berry L, Zhao Z, Roth BL, Xu W, Liu-Chen LY, Carlezon WA, Jr., and Cohen BM.** N-methylacetamide analog of salvinorin A: a highly potent and selective kappa-opioid receptor agonist with oral efficacy. *J Pharmacol Exp Ther* 324: 188-195, 2008.
12. **Bhatnagar A, Sheffler DJ, Kroeze WK, Compton-Toth B, and Roth BL.** Caveolin-1 interacts with 5-HT<sub>2A</sub> serotonin receptors and profoundly modulates the signaling of selected G<sub>α</sub>q-coupled protein receptors. *J Biol Chem* 279: 34614-34623, 2004.
13. **Bikbulatov RV, Stewart J, Jin W, Yan F, Roth BL, Ferreira D, and Zjawiony JK.** Short synthesis of a novel class of salvinorin A analogs with hemiacetalic structure. *Tetrahedron Letters* 49: 937-940, 2008.
14. **Bikbulatov RV, Yan F, Roth BL, and Zjawiony JK.** Convenient synthesis and in vitro pharmacological activity of 2-thioanalogs of salvinorins A and B. *Bioorg Med Chem Lett* 17: 2229-2232, 2007.
15. **Bonaventure P, Nepomuceno D, Hein L, Sutcliffe JG, Lovenberg T, and Hedlund PB.** Radioligand binding analysis of knockout mice reveals 5-hydroxytryptamine<sub>7</sub> receptor distribution and uncovers 8-hydroxy-2-(di-n-propylamino)tetralin interaction with [α]<sub>2</sub> adrenergic receptors. *Neuroscience* 124: 901-911, 2004.
16. **Bondarev ML, Bondareva TS, Young R, and Glennon RA.** Behavioral and biochemical investigations of bupropion metabolites. *European Journal of Pharmacology* 474: 85-93, 2003.
17. **Buntinx E.** Method of treating mental disorders using D<sub>4</sub> and 5-HT<sub>2A</sub> antagonists, inverse agonists or partial agonists, 2004.

18. **Carato P, Graulich A, Jensen N, Roth BL, and Liegeois JF.** Synthesis and in vitro binding studies of substituted piperidine naphthamides. Part I: Influence of the substitution on the basic nitrogen and the position of the amide on the affinity for D2L, D4.2, and 5-HT2A receptors. *Bioorg Med Chem Lett* 17: 1565-1569, 2007.
19. **Carato P, Graulich A, Jensen N, Roth BL, and Liegeois JF.** Synthesis and in vitro binding studies of substituted piperidine naphthamides. Part II: Influence of the substitution on the benzyl moiety on the affinity for D2L, D4.2, and 5-HT2A receptors. *Bioorg Med Chem Lett* 17: 1570-1574, 2007.
20. **Chemel BR, Roth BL, Armbruster B, Watts VJ, and Nichols DE.** WAY-100635 is a potent dopamine D4 receptor agonist. *Psychopharmacology (Berl)* 188: 244-251, 2006.
21. **Chu W, Tu Z, McElveen E, Xu J, Taylor M, Luedtke RR, and Mach RH.** Synthesis and in vitro binding of N-phenyl piperazine analogs as potential dopamine D3 receptor ligands. *Bioorganic & Medicinal Chemistry* 13: 77-87, 2005.
22. **Conn PJ and Roth BL.** Opportunities and Challenges of Psychiatric Drug Discovery: Roles for Scientists in Academic, Industry, and Government Settings. *Neuropsychopharmacology*, 2008.
23. **Cremers TIFH, Giorgetti M, Bosker FJ, Hogg S, Arnt J, Mork A, Honig G, Bogeso K-P, Westerink BHC, den Boer H, Wikstrom HV, and Tecott LH.** Inactivation of 5-HT2C Receptors Potentiates Consequences of Serotonin Reuptake Blockade. 29: 1782-1789, 2004.
24. **Dallanocce C, De Amici M, Barocelli E, Bertoni S, Roth BL, Ernsberger P, and De Micheli C.** Novel oxotremorine-related heterocyclic derivatives: Synthesis and in vitro pharmacology at the muscarinic receptor subtypes. *Bioorg Med Chem* 15: 7626-7637, 2007.
25. **Dandapani S, Lan P, Beeler AB, Beischel S, Abbas A, Roth BL, Porco JA, Jr., and Panek JS.** Convergent synthesis of complex diketopiperazines derived from pipercolic acid scaffolds and parallel screening against GPCR targets. *J Org Chem* 71: 8934-8945, 2006.
26. **Davies MA, Compton-Toth BA, Hufeisen SJ, Meltzer HY, and Roth BL.** The highly efficacious actions of N-desmethylclozapine at muscarinic receptors are unique and not a common property of either typical or atypical antipsychotic drugs: is M1 agonism a pre-requisite for mimicking clozapine's actions? *Psychopharmacology* 178: 451-460, 2005.
27. **Davies MA, Setola V, Strachan RT, Sheffler DJ, Salay E, Hufeisen SJ, and Roth BL.** Pharmacologic analysis of non-synonymous coding h5-HT2A SNPs reveals alterations in atypical antipsychotic and agonist efficacies. *Pharmacogenomics J* 6: 42-51, 2006.
28. **Davies MA, Sheffler DJ, and Roth BL.** Aripiprazole: A Novel Atypical Antipsychotic Drug With a Uniquely Robust Pharmacology doi:10.1111/j.1527-3458.2004.tb00030.x. *CNS Drug Reviews* 10: 317-336, 2004.
29. **De Amici M, Conti P, Fasoli E, Barocelli E, Ballabeni V, Bertoni S, Impicciatore M, Roth BL, Ernsberger P, and De Micheli C.** Synthesis and in vitro pharmacology of novel heterocyclic muscarinic ligands. *Il Farmaco* 58: 739-748, 2003.
30. **Deupree JD, Montgomery MD, and Bylund DB.** Pharmacological properties of the active metabolites of the antidepressants desipramine and citalopram. *Eur J Pharmacol* 576: 55-60, 2007.
31. **Dukat M, Glennon RA, and Young S.** MD-354: What is It Good For? doi:10.1111/j.1527-3458.2007.00002.x. *CNS Drug Reviews* 13: 1-20, 2007.
32. **Dukat M, Mosier PD, Kolanos R, Roth BL, and Glennon RA.** Binding of Serotonin and N1-Benzenesulfonyltryptamine-Related Analogs at Human 5-HT6 Serotonin Receptors: Receptor Modeling Studies. *J Med Chem* 51: 603-611, 2008.
33. **Dukat M, Ramunno A, Banzi R, Damaj MI, Martin B, and Glennon RA.** 3-(2-Aminoethyl)pyridine analogs as alpha4beta2 nicotinic cholinergic receptor ligands. *Bioorg Med Chem Lett* 15: 4308-4312, 2005.
34. **Edgar Jacoby RB, Marc Gerspacher, Klaus Seuwen,.** The 7 TM G-Protein-Coupled Receptor Target Family. *ChemMedChem* 1: 760-782, 2006.
35. **Ekins S, Shimada J, and Chang C.** Application of data mining approaches to drug delivery. *Advanced Drug Delivery Reviews Computational Drug Delivery* 58: 1409-1430, 2006.

36. **Elphick GF, Querbes W, Jordan JA, Gee GV, Eash S, Manley K, Dugan A, Stanifer M, Bhatnagar A, Kroeze WK, Roth BL, and Atwood WJ.** The human polyomavirus, JCV, uses serotonin receptors to infect cells. *Science* 306: 1380-1383, 2004.
37. **Faden AI, Knoblach SM, Cernak I, Fan L, Vink R, Araldi GL, Fricke ST, Roth BL, and Kozikowski AP.** Novel Diketopiperazine Enhances Motor and Cognitive Recovery After Traumatic Brain Injury in Rats and Shows Neuroprotection In Vitro and In Vivo. 23: 342-354, 2003.
38. **Faden AI, Knoblach SM, Movsesyan VA, Lea PM, IV, and Cernak I.** Novel Neuroprotective Tripeptides and Dipeptides. *Annals of the New York Academy of Sciences* 1053: 472-481, 2005.
39. **Floresca CZ and Schetz JA.** Dopamine receptor microdomains involved in molecular recognition and the regulation of drug affinity and function. *J Recept Signal Transduct Res* 24: 207-239, 2004.
40. **Frantz S.** Study shows newer schizophrenia treatments no more effective than old. *Nat Rev Drug Discov* 4: 872-873, 2005.
41. **Gelmi ML, Caputo F, Clerici F, Pellegrino S, Giannaccini G, Betti L, Fabbrini L, Schmid L, Palego L, and Lucacchini A.** 1-Aminocyclopentane-1,2,4-tricarboxylic acids screening on glutamatergic and serotonergic systems. *Bioorganic & Medicinal Chemistry* 15: 7581-7589, 2007.
42. **Gerard J, O'Sullivan AK, David K, Grandy, Orna Tighe, David T. Croke, John L. Waddington,.** Ethological resolution of behavioral topography and D2-like vs. D1-like agonist responses in congenic D4 dopamine receptor knockouts: Identification of D4:D1-like interactions. *Synapse* 59: 107-118, 2006.
43. **Ghoneim OM, Legere JA, Golbraikh A, Tropsha A, and Booth RG.** Novel ligands for the human histamine H1 receptor: Synthesis, pharmacology, and comparative molecular field analysis studies of 2-dimethylamino-5-(6)-phenyl-1,2,3,4-tetrahydronaphthalenes. *Bioorganic & Medicinal Chemistry* 14: 6640-6658, 2006.
44. **Gillman PK.** A Review of Serotonin Toxicity Data: Implications for the Mechanisms of Antidepressant Drug Action. *Biological Psychiatry* 59: 1046-1051, 2006.
45. **Gillman PK.** A systematic review of the serotonergic effects of mirtazapine in humans: implications for its dual action status. *Hum Psychopharmacol* 21: 117-125, 2006.
46. **Gillman PK.** Tricyclic antidepressant pharmacology and therapeutic drug interactions updated. 151: 737-748, 2007.
47. **Giorgioni G, Ruggieri S, Claudi F, Di Stefano A, Ljung E, and Carlsson T.** Synthesis and Pharmacological Evaluation of 4-Phenoxy-1,2,3,4-Tetrahydroisoquinolines and 4,5,6,6a-Tetrahydrochromeno[2,3,4-de]isoquinolines. *Med Chem* 4: 1-10, 2008.
48. **Glennon RA and Roth BL.** Selective 5-HT<sub>6</sub> receptor ligands. USA: Virginia Commonwealth University, 2003.
49. **Glick SD, Ramirez RL, Livi JM, and Maisonneuve IM.** 18-Methoxycoronaridine acts in the medial habenula and/or interpeduncular nucleus to decrease morphine self-administration in rats. *European Journal of Pharmacology* 537: 94-98, 2006.
50. **Goldberg MS, Fleming SM, Palacino JJ, Cepeda C, Lam HA, Bhatnagar A, Meloni EG, Wu N, Ackerson LC, Klapstein GJ, Gajendiran M, Roth BL, Chesselet MF, Maidment NT, Levine MS, and Shen J.** Parkin-deficient mice exhibit nigrostriatal deficits but not loss of dopaminergic neurons. *J Biol Chem* 278: 43628-43635, 2003.
51. **Goldberg MS, Pisani A, Haburcak M, Vortherms TA, Kitada T, Costa C, Tong Y, Martella G, Tscherter A, Martins A, Bernardi G, Roth BL, Pothos EN, Calabresi P, and Shen J.** Nigrostriatal dopaminergic deficits and hypokinesia caused by inactivation of the familial Parkinsonism-linked gene DJ-1. *Neuron* 45: 489-496, 2005.
52. **Gray JA, Bhatnagar A, Gurevich VV, and Roth BL.** The interaction of a constitutively active arrestin with the arrestin-insensitive 5-HT<sub>2A</sub> receptor induces agonist-independent internalization. *Mol Pharmacol* 63: 961-972, 2003.
53. **Gray JA, Compton-Toth BA, and Roth BL.** Identification of two serine residues essential for agonist-induced 5-HT<sub>2A</sub> receptor desensitization. *Biochemistry* 42: 10853-10862, 2003.



54. **Gray JA and Roth BL.** Molecular targets for treating cognitive dysfunction in schizophrenia. *Schizophr Bull* 33: 1100-1119, 2007.
55. **Gray JA and Roth BL.** The pipeline and future of drug development in schizophrenia. *Mol Psychiatry* 12: 904-922, 2007.
56. **Grella B, Teitler M, Smith C, Herrick-Davis K, and Glennon RA.** Binding of [beta]-Carbolines at 5-HT<sub>2</sub> serotonin receptors. *Bioorganic & Medicinal Chemistry Letters* 13: 4421-4425, 2003.
57. **Hopkins AL and Polinsky A.** Knowledge and Intelligence in Drug Design. In: *Annual Reports in Medicinal Chemistry*, edited by Wood A: Academic Press, 2006, p. 425-238.
58. **Huang Y, Bae S-A, Roth BL, and Laruelle M.** Synthesis of potent and selective serotonin 5-HT<sub>1B</sub> receptor ligands. *Bioorganic & Medicinal Chemistry Letters* 15: 4786-4789, 2005.
59. **Huang Y, Hwang D-R, Bae S-A, Sudo Y, Guo N, Zhu Z, Narendran R, and Laruelle M.** A new positron emission tomography imaging agent for the serotonin transporter: synthesis, pharmacological characterization, and kinetic analysis of [11C]-2-[(dimethylaminomethyl)phenylthio]-5-fluoromethylphenylamine ([11C]AFM). *Nuclear Medicine and Biology* 31: 543-556, 2004.
60. **Huang Y, Zhu Z, Xiao Y, and Laruelle M.** Epibatidine analogues as selective ligands for the [alpha]x[beta]<sub>2</sub>-containing subtypes of nicotinic acetylcholine receptors. *Bioorganic & Medicinal Chemistry Letters* 15: 4385-4388, 2005.
61. **Imaizumi M, Briard E, Zoghbi SS, Gourley JP, Hong J, Fujimura Y, Pike VW, Innis RB, and Fujita M.** Brain and whole-body imaging in nonhuman primates of [11C]PBR28, a promising PET radioligand for peripheral benzodiazepine receptors. *NeuroImage* 39: 1289-1298, 2008.
62. **Iso Y, Grajkowska E, Wroblewski JT, Davis J, Goeders NE, Johnson KM, Sanker S, Roth BL, Tueckmantel W, and Kozikowski AP.** Synthesis and structure-activity relationships of 3-[(2-methyl-1,3-thiazol-4-yl)ethynyl]pyridine analogues as potent, noncompetitive metabotropic glutamate receptor subtype 5 antagonists; search for cocaine medications. *J Med Chem* 49: 1080-1100, 2006.
63. **Jassen AK, Yang H, Miller GM, Calder E, and Madras BK.** Receptor Regulation of Gene Expression of Axon Guidance Molecules: Implications for Adaptation. *Molecular Pharmacology* *Mol Pharmacol* 70: 71-77, 2006.
64. **Jensen NH, Rodriguiz RM, Caron MG, Wetsel WC, Rothman RB, and Roth BL.** N-Desalkylquetiapine, a Potent Norepinephrine Reuptake Inhibitor and Partial 5-HT<sub>1A</sub> Agonist, as a Putative Mediator of Quetiapine's Antidepressant Activity. *Neuropsychopharmacology*, 2007.
65. **Keiser MJ, Roth BL, Armbruster BN, Ernsberger P, Irwin JJ, and Shoichet BK.** Relating protein pharmacology by ligand chemistry. *Nat Biotechnol* 25: 197-206, 2007.
66. **Khorana N, Pullagurla MR, Young R, and Glennon RA.** Comparison of the discriminative stimulus effects of 3,4-methylenedioxymethamphetamine (MDMA) and cocaine: asymmetric generalization. *Drug and Alcohol Dependence* 74: 281-287, 2004.
67. **Klunk WE, Wang Y, Huang G-f, Debnath ML, Holt DP, Shao L, Hamilton RL, Ikonovic MD, DeKosky ST, and Mathis CA.** The Binding of 2-(4'-Methylaminophenyl)Benzothiazole to Postmortem Brain Homogenates Is Dominated by the Amyloid Component. *Journal of Neuroscience* *J Neurosci* 23: 2086-2092, 2003.
68. **Kolanos R, Dukat M, Roth BL, and Glennon RA.** Interaction of N1-unsubstituted and N1-benzenesulfonyltryptamines at h5-HT<sub>6</sub> receptors. *Bioorg Med Chem Lett* 16: 5832-5835, 2006.
69. **Kolanos R, Siripurapu U, Pullagurla M, Riaz M, Setola V, Roth BL, Dukat M, and Glennon RA.** Binding of isoptryptamines and indenes at h5-HT<sub>6</sub> serotonin receptors. *Bioorg Med Chem Lett* 15: 1987-1991, 2005.
70. **Kozikowski AP, Johnson KM, Deschaux O, Bandyopadhyay BC, Araldi GL, Carmona G, Munzar P, Smith MP, Balster RL, Beardsley PM, and Tella SR.** Mixed Cocaine Agonist/Antagonist Properties of (+)-Methyl 4beta-(4-Chlorophenyl)-1-methylpiperidine-3alpha-

carboxylate, a Piperidine-Based Analog of Cocaine. *Journal of Pharmacology And Experimental Therapeutics*

*J Pharmacol Exp Ther* 305: 143-150, 2003.

71. **Kozikowski AP, Roth B, and Tropsha A.** Why academic drug discovery makes sense. *Science* 313: 1235-1236, 2006.

72. **Kroeze WK, Hufeisen SJ, Popadak BA, Renock SM, Steinberg S, Ernsberger P, Jayathilake K, Meltzer HY, and Roth BL.** H1-histamine receptor affinity predicts short-term weight gain for typical and atypical antipsychotic drugs. *Neuropsychopharmacology* 28: 519-526, 2003.

73. **Kroeze WK and Roth BL.** Screening the receptorome. *J Psychopharmacol* 20: 41-46, 2006.

74. **Kroeze WK, Sheffler DJ, and Roth BL.** G-protein-coupled receptors at a glance. *Journal of Cell Science*

*J Cell Sci* 116: 4867-4869, 2003.

75. **Kulkarni SS and Newman AH.** Design and synthesis of novel heterobiaryl amides as metabotropic glutamate receptor subtype 5 antagonists. *Bioorg Med Chem Lett* 17: 2074-2079, 2007.

76. **Kulkarni SS and Newman AH.** Discovery of heterobicyclic templates for novel metabotropic glutamate receptor subtype 5 antagonists. *Bioorg Med Chem Lett* 17: 2987-2991, 2007.

77. **Kulkarni SS, Nightingale B, Dersch CM, Rothman RB, and Newman AH.** Design and synthesis of noncompetitive metabotropic glutamate receptor subtype 5 antagonists. *Bioorganic & Medicinal Chemistry Letters* 16: 3371-3375, 2006.

78. **Kumar J, Prabhakaran J, Majo V, Milak M, Hsiung S-C, Tamir H, Simpson N, Van Heertum R, Mann J, and Parsey R.** Synthesis and in vivo evaluation of a novel 5-HT<sub>1A</sub> receptor agonist radioligand [O-methyl-<sup>11</sup>C]2-(4-(4-(2-methoxyphenyl)piperazin-1-yl)butyl)-4-methyl-1,2,4-triazine-3,5(2H,4H)dione in nonhuman primates. *European Journal of Nuclear Medicine and Molecular Imaging* 34: 1050-1060, 2007.

79. **Kumar JS, Prabhakaran J, Erlandsson K, Majo VJ, Simpson NR, Pratap M, Van Heertum RL, Mann JJ, and Parsey RV.** Synthesis and in vivo evaluation of [O-methyl-<sup>11</sup>C](2R,4R)-4-hydroxy-2-[2-[2-(3-methoxy)phenyl]ethyl]phenoxy]ethyl-1-methylpyrrolidine as a 5-HT<sub>2A</sub> receptor PET ligand. *Nucl Med Biol* 33: 565-574, 2006.

80. **Kung M-P, Choi S-R, Hou C, Zhuang Z-P, Foulon C, and Kung HF.** Selective binding of 2-[<sup>125</sup>I]iodo-nisoxetine to norepinephrine transporters in the brain. *Nuclear Medicine and Biology* 31: 533-541, 2004.

81. **Kushwaha N, Harwood SC, Wilson AM, Berger M, Tecott LH, Roth BL, and Albert PR.** Molecular determinants in the second intracellular loop of the 5-hydroxytryptamine-1A receptor for G-protein coupling. *Mol Pharmacol* 69: 1518-1526, 2006.

82. **Lapinsh M, Prusis P, Uhlen S, and Wikberg JES.** Improved approach for proteochemometrics modeling: application to organic compound-amine G protein-coupled receptor interactions. *Bioinformatics* 21: 4289-4296, 2005.

83. **Lee M, Rangisetty JB, Pullagurla MR, Dukat M, Setola V, Roth BL, and Glennon RA.** 1-(1-Naphthyl)piperazine as a novel template for 5-HT<sub>6</sub> serotonin receptor ligands. *Bioorg Med Chem Lett* 15: 1707-1711, 2005.

84. **Maciag D, Simpson KL, Coppinger D, Lu Y, Wang Y, Lin RC, and Paul IA.** Neonatal antidepressant exposure has lasting effects on behavior and serotonin circuitry. *Neuropsychopharmacology* 31: 47-57, 2006.

85. **Madras BK, Fahey MA, Goulet M, Lin Z, Bendor J, Goodrich C, Meltzer PC, Elmaleh DR, Livni E, Bonab AA, and Fischman AJ.** Dopamine Transporter (DAT) Inhibitors Alleviate Specific Parkinsonian Deficits in Monkeys: Association with DAT Occupancy in Vivo. *Journal of Pharmacology And Experimental Therapeutics*  
*J Pharmacol Exp Ther* 319: 570-585, 2006.

86. **Madras BK, Fahey MA, Miller GM, De La Garza R, Goulet M, Spealman RD, Meltzer PC, George SR, O'Dowd BF, Bonab AA, Livni E, and Fischman AJ.** Non-amine-based dopamine transporter (reuptake) inhibitors retain properties of amine-based progenitors. *European Journal of Pharmacology*

*Transporters as targets for drugs and endogenous compounds* 479: 41-51, 2003.

87. **Maisonneuve IM and Glick SD.** Anti-addictive actions of an iboga alkaloid congener: a novel mechanism for a novel treatment. *Pharmacology Biochemistry and Behavior Plants and the Central Nervous System* 75: 607-618, 2003.
88. **Majo VJ, Prabhakaran J, Simpson NR, Van Heertum RL, Mann JJ, and Kumar JS.** A general method for the synthesis of aryl [<sup>11</sup>C]methylsulfones: potential PET probes for imaging cyclooxygenase-2 expression. *Bioorg Med Chem Lett* 15: 4268-4271, 2005.
89. **Masao Imaizumi EB, Sami S. Zoghbi, Jonathan P. Gourley, Jinsoo Hong, John L. Musachio, Robert Gladding, Victor W. Pike, Robert B. Innis, Masahiro Fujita.** Kinetic evaluation in nonhuman primates of two new PET ligands for peripheral benzodiazepine receptors in brain. *Synapse* 61: 595-605, 2007.
90. **McCarron JA, Zoghbi SS, Shetty HU, Vermeulen ES, Wikstrom HV, Ichise M, Yasuno F, Halldin C, Innis RB, and Pike VW.** Synthesis and initial evaluation of [<sup>11</sup>C](R)-RWAY in monkey—a new, simply labeled antagonist radioligand for imaging brain 5-HT<sub>1A</sub> receptors with PET. *Eur J Nucl Med Mol Imaging* 34: 1670-1682, 2007.
91. **McCurdy CR and Scully SS.** Analgesic substances derived from natural products (natureceuticals). *Life Sciences NATURECEUTICALS (NATURAL PRODUCTS), NUTRACEUTICALS, HERBAL BOTANICALS, AND PSYCHOACTIVES: DRUG DISCOVERY AND DRUG-DRUG INTERACTIONS - Volume I: Natureceuticals (Natural Products), Herbal Botanicals, Psychoactive Hallucinogens and Related Products* 78: 476-484, 2005.
92. **Munro TA, Goetchius GW, Roth BL, Vortherms TA, and Rizzacasa MA.** Autoxidation of salvinorin A under basic conditions. *J Org Chem* 70: 10057-10061, 2005.
93. **Munro TA, Rizzacasa MA, Roth BL, Toth BA, and Yan F.** Studies toward the pharmacophore of salvinorin A, a potent kappa opioid receptor agonist. *J Med Chem* 48: 345-348, 2005.
94. **Neve KA, DuRand CJ, and Teeter MM.** Structural Analysis of the Mammalian D<sub>2</sub>, D<sub>3</sub>, and D<sub>4</sub> Dopamine Receptors. In: *Dopamine Receptors and Transporters: Function, Imaging, and Clinical Implication*, edited by Sidhu A, Laurelle M and Vernier P: Informa Health Care, 2003, p. 71-128.
95. **Nyandege A, Kolanos R, Roth BL, and Glennon RA.** Further studies on the binding of N<sub>1</sub>-substituted tryptamines at h<sub>5</sub>-HT<sub>6</sub> receptors. *Bioorg Med Chem Lett* 17: 1691-1694, 2007.
96. **O'Connor KA and Roth BL.** Finding new tricks for old drugs: an efficient route for public-sector drug discovery. *Nat Rev Drug Discov* 4: 1005-1014, 2005.
97. **O'Connor KA and Roth BL.** Screening the receptorome for plant-based psychoactive compounds. *Life Sciences NATURECEUTICALS (NATURAL PRODUCTS), NUTRACEUTICALS, HERBAL BOTANICALS, AND PSYCHOACTIVES: DRUG DISCOVERY AND DRUG-DRUG INTERACTIONS - Volume I: Natureceuticals (Natural Products), Herbal Botanicals, Psychoactive Hallucinogens and Related Products* 78: 506-511, 2005.
98. **Ogden KK, Falck JR, and Watts SW.** The Cytochrome P450 Inhibitor Ketoconazole Potentiates 5-Hydroxytryptamine-Induced Contraction in Rat Aorta. *Journal of Pharmacology And Experimental Therapeutics J Pharmacol Exp Ther* 323: 606-613, 2007.
99. **Olszewski RT, Bukhari N, Zhou J, Kozikowski AP, Wroblewski JT, Shamimi-Noori S, Wroblewska B, Bzdega T, Vicini S, Barton FB, and Neale JH.** NAAG peptidase inhibition reduces locomotor activity and some stereotypes in the PCP model of schizophrenia via group II mGluR  
doi:10.1111/j.1471-4159.2004.02358.x. *Journal of Neurochemistry* 89: 876-885, 2004.
100. **Onali P and Olanas MC.** N-Desmethylclozapine, a Major Clozapine Metabolite, Acts as a Selective and Efficacious [delta]-Opioid Agonist at Recombinant and Native Receptors. *J Neurochem* 32: 773-785, 2006.
101. **O'Sullivan GJ, Roth BL, Kinsella A, and Waddington JL.** SK&F 83822 distinguishes adenylyl cyclase from phospholipase C-coupled dopamine D<sub>1</sub>-like receptors: behavioural topography. *European Journal of Pharmacology* 486: 273-280, 2004.

102. **Paolini GV, Shapland RHB, van Hoorn WP, Mason JS, and Hopkins AL.** Global mapping of pharmacological space. *24*: 805-815, 2006.
103. **Peddi S, Roth BL, Glennon RA, and Westkaemper RB.** Ring substituted analogues of 5-aminomethyl-10,11-dihydro-dibenzo[a,d]cycloheptene (AMDH): potential modes of binding to the 5-HT<sub>2A</sub> receptor. *Bioorganic & Medicinal Chemistry Letters* 13: 2565-2568, 2003.
104. **Peddi S, Roth BL, Glennon RA, and Westkaemper RB.** Spiro[9,10-dihydroanthracene]-9,3'-pyrrolidine--a structurally unique tetracyclic 5-HT<sub>2A</sub> receptor antagonist. *European Journal of Pharmacology* 482: 335-337, 2003.
105. **Peddi S, Roth BL, Glennon RA, and Westkaemper RB.** Structural determinants for high 5-HT<sub>2A</sub> receptor affinity of spiro[9,10-dihydroanthracene]-9,3'-pyrrolidine (SpAMDA). *Bioorganic & Medicinal Chemistry Letters* 14: 2279-2283, 2004.
106. **Pehék EA, Nocjar C, Roth BL, Byrd TA, and Mabrouk OS.** Evidence for the preferential involvement of 5-HT<sub>2A</sub> serotonin receptors in stress- and drug-induced dopamine release in the rat medial prefrontal cortex. *Neuropsychopharmacology* 31: 265-277, 2006.
107. **Petrie KA, Schmidt D, Bubser M, Fadel J, Carraway RE, and Deutch AY.** Neurotensin Activates GABAergic Interneurons in the Prefrontal Cortex. *Journal of Neuroscience* *J Neurosci* 25: 1629-1636, 2005.
108. **Phillip L, Quirk SR, Bryan L. Roth, Ruth E. Siegel,.** Three putative N-glycosylation sites within the murine 5-HT<sub>3A</sub> receptor sequence affect plasma membrane targeting, ligand binding, and calcium influx in heterologous mammalian cells. *Journal of Neuroscience Research* 77: 498-506, 2004.
109. **Prabhakaran J, Parsey RV, Majo VJ, Hsiung S-C, Milak MS, Tamir H, Simpson NR, Van Heertum RL, Mann JJ, and Dileep Kumar JS.** Synthesis, in vitro and in vivo evaluation of [O-methyl-<sup>11</sup>C] 2-{4-[4-(3-methoxyphenyl)piperazin-1-yl]-butyl}-4-methyl-2H-[1,2,4]-triazine-3,5-dione: A novel agonist 5-HT<sub>1A</sub> receptor PET ligand. *Bioorganic & Medicinal Chemistry Letters* 16: 2101-2104, 2006.
110. **Prabhakaran J, Underwood MD, Parsey RV, Arango V, Majo VJ, Simpson NR, Van Heertum R, Mann JJ, and Kumar JS.** Synthesis and in vivo evaluation of [18F]-4-[5-(4-methylphenyl)-3-(trifluoromethyl)-1H-pyrazol-1-yl]benzenesulfonyl amide as a PET imaging probe for COX-2 expression. *Bioorg Med Chem* 15: 1802-1807, 2007.
111. **Pullagurta M, Bondareva T, Young R, and Glennon RA.** Modulation of the stimulus effects of (+)amphetamine by the 5-HT<sub>6</sub> antagonist MS-245. *Pharmacology Biochemistry and Behavior* 78: 263-268, 2004.
112. **Pullagurta M, Siripurapu U, Kolanos R, Bondarev ML, Dukat M, Setola V, Roth BL, and Glennon RA.** Binding of amine-substituted N1-benzenesulfonylindoles at human 5-HT<sub>6</sub> serotonin receptors. *Bioorg Med Chem Lett* 15: 5298-5302, 2005.
113. **Raddatz R and Hartman DS.** G Protein-Coupled Receptors in CNS Drug Discovery. In: *G Protein-Coupled Receptors in Drug Discovery*: CRC Press, 2006, p. 109-142.
114. **Ramunno A, Dukat M, Lee M, Young R, El-Zahabi M, Damaj MI, Martin B, and Glennon RA.** 6-(2-Phenylethyl)nicotine: a novel nicotinic cholinergic receptor ligand. *Bioorg Med Chem Lett* 15: 3237-3240, 2005.
115. **Regard JB, Kataoka H, Cano DA, Camerer E, Yin L, Zheng YW, Scanlan TS, Hebrok M, and Coughlin SR.** Probing cell type-specific functions of Gi in vivo identifies GPCR regulators of insulin secretion. *J Clin Invest* 117: 4034-4043, 2007.
116. **Richtand NM, Welge JA, Logue AD, Keck PE, Jr., Strakowski SM, and McNamara RK.** Dopamine and serotonin receptor binding and antipsychotic efficacy. *Neuropsychopharmacology* 32: 1715-1726, 2007.
117. **Roth B.** An Interview with Bryan Roth, M.D., Ph.D. *Assay Drug Dev Technol* 5: 593-598, 2007.
118. **Roth BL.** Contributions of molecular biology to antipsychotic drug discovery: promises fulfilled or unfulfilled? *Dialogues Clin Neurosci* 8: 303-309, 2006.
119. **Roth BL.** Drugs and valvular heart disease. *N Engl J Med* 356: 6-9, 2007.
120. **Roth BL.** Probing the "Receptorome" Unveils the Receptor Pharmacology of Atypical Antipsychotic Drugs. In: *Atypical Antipsychotics: From Bench to Bedside*, edited by Csernansky JG and Lauriello J: Informa Health Care, 2004, p. 19-42.

121. **Roth BL.** Receptor systems: will mining the receptorome yield novel targets for pharmacotherapy? *Pharmacol Ther* 108: 59-64, 2005.
122. **Roth BL, Hanizavareh SM, and Blum AE.** Serotonin receptors represent highly favorable molecular targets for cognitive enhancement in schizophrenia and other disorders. *Psychopharmacology* 174: 17-24, 2004.
123. **Roth BL and Kroeze WK.** Screening the receptorome yields validated molecular targets for drug discovery. *Curr Pharm Des* 12: 1785-1795, 2006.
124. **Roth BL, Lopez E, Beischel S, Westkaemper RB, and Evans JM.** Screening the receptorome to discover the molecular targets for plant-derived psychoactive compounds: a novel approach for CNS drug discovery. *Pharmacology & Therapeutics Psychoactive Plants* 102: 99-110, 2004.
125. **Roth BL, Sheffler D, and Potkin SG.** Atypical antipsychotic drug actions: unitary or multiple mechanisms for 'atypicality'? *Clinical Neuroscience Research* 3: 108-117, 2003.
126. **Roth BL, Sheffler DJ, and Kroeze WK.** Magic shotguns versus magic bullets: selectively non-selective drugs for mood disorders and schizophrenia. *Nat Rev Drug Discov* 3: 353-359, 2004.
127. **Roth BL and Xia Z.** Molecular and cellular mechanisms for the polarized sorting of serotonin receptors: relevance for genesis and treatment of psychosis. *Crit Rev Neurobiol* 16: 229-236, 2004.
128. **Rothman RB, Blough BE, Woolverton WL, Anderson KG, Negus SS, Mello NK, Roth BL, and Baumann MH.** Development of a rationally designed, low abuse potential, biogenic amine releaser that suppresses cocaine self-administration. *J Pharmacol Exp Ther* 313: 1361-1369, 2005.
129. **Sard H, Kumaran G, Morency C, Roth BL, Toth BA, He P, and Shuster L.** SAR of psilocybin analogs: discovery of a selective 5-HT<sub>2C</sub> agonist. *Bioorg Med Chem Lett* 15: 4555-4559, 2005.
130. **Schou M, Pike VW, Sovago J, Gulyas B, Gallagher PT, Dobson DR, Walter MW, Rudyk H, Farde L, and Halldin C.** Synthesis of <sup>11</sup>C-labelled (R)-OHDMI and CFMME and their evaluation as candidate radioligands for imaging central norepinephrine transporters with PET. *Bioorg Med Chem* 15: 616-625, 2007.
131. **Seneca N, Cai L, Liow J-S, Zoghbi SS, Gladding RL, Hong J, Pike VW, and Innis RB.** Brain and whole-body imaging in nonhuman primates with [<sup>11</sup>C]MeS-IMPY, a candidate radioligand for [beta]-amyloid plaques. *Nuclear Medicine and Biology* 34: 681-689, 2007.
132. **Setola V, Dukat M, Glennon RA, and Roth BL.** Molecular determinants for the interaction of the valvulopathic anorexigen norfenfluramine with the 5-HT<sub>2B</sub> receptor. *Mol Pharmacol* 68: 20-33, 2005.
133. **Setola V, Hufeisen SJ, Grande-Allen KJ, Vesely I, Glennon RA, Blough B, Rothman RB, and Roth BL.** 3,4-methylenedioxymethamphetamine (MDMA, "Ecstasy") induces fenfluramine-like proliferative actions on human cardiac valvular interstitial cells in vitro. *Mol Pharmacol* 63: 1223-1229, 2003.
134. **Setola V and Roth BL.** Screening the receptorome reveals molecular targets responsible for drug-induced side effects: focus on 'fen-phen'. *Expert Opin Drug Metab Toxicol* 1: 377-387, 2005.
135. **Setola V and Roth BL.** Why mice are neither miniature humans nor small rats: a cautionary tale involving 5-hydroxytryptamine-6 serotonin receptor species variants. *Mol Pharmacol* 64: 1277-1278, 2003.
136. **Severance AJ, Milak MS, Kumar JS, Prabhakaran J, Majo VJ, Simpson NR, Van Heertum RL, Arango V, Mann JJ, and Parsey RV.** In vivo assessment of [<sup>11</sup>C]MRB as a prospective PET ligand for imaging the norepinephrine transporter. *Eur J Nucl Med Mol Imaging* 34: 688-693, 2007.
137. **Shapiro DA, Renock S, Arrington E, Chiodo LA, Liu L-X, Sibley DR, Roth BL, and Mailman R.** Aripiprazole, A Novel Atypical Antipsychotic Drug with a Unique and Robust Pharmacology. 28: 1400-1411, 2003.
138. **Sheffler DJ, Kroeze WK, Garcia BG, Deutch AY, Hufeisen SJ, Leahy P, Bruning JC, and Roth BL.** p90 ribosomal S6 kinase 2 exerts a tonic brake on G protein-coupled receptor signaling. *Proc Natl Acad Sci U S A* 103: 4717-4722, 2006.

139. **Sheffler DJ and Roth BL.** Salvinorin A: the 'magic mint' hallucinogen finds a molecular target in the kappa opioid receptor. *Trends in Pharmacological Sciences* 24: 107-109, 2003.
140. **Shi Q, Hufeisen SJ, Wroblewski JT, Nadeau JH, and Roth BL.** L-homocysteine sulfinic acid and L-homocysteic acid stimulate phosphoinositide hydrolysis in rat cortical neurons. *Ann N Y Acad Sci* 1003: 461-463, 2003.
141. **Shi Q, Savage JE, Hufeisen SJ, Rauser L, Grajkowska E, Ernsberger P, Wroblewski JT, Nadeau JH, and Roth BL.** L-homocysteine sulfinic acid and other acidic homocysteine derivatives are potent and selective metabotropic glutamate receptor agonists. *J Pharmacol Exp Ther* 305: 131-142, 2003.
142. **Sikazwe D, Bondarev ML, Dukat M, Rangisetty JB, Roth BL, and Glennon RA.** Binding of sulfonyl-containing arylalkylamines at human 5-HT<sub>6</sub> serotonin receptors. *J Med Chem* 49: 5217-5225, 2006.
143. **Sikazwe DMN, Li S, Mardenborough L, Cody V, Roth BL, and Ablordeppey SY.** Haloperidol: towards further understanding of the structural contributions of its pharmacophoric elements at D<sub>2</sub>-like receptors. *Bioorganic & Medicinal Chemistry Letters* 14: 5739-5742, 2004.
144. **Siripurapu U, Kolanos R, Dukat M, Roth BL, and Glennon RA.** Binding of methoxy-substituted N<sub>1</sub>-benzenesulfonylindole analogs at human 5-HT<sub>6</sub> serotonin receptors. *Bioorg Med Chem Lett* 16: 3793-3796, 2006.
145. **Sondergaard K, Kristensen JL, Palner M, Gillings N, Knudsen GM, Roth BL, and Begtrup M.** Synthesis and binding studies of 2-arylapomorphines. *Org Biomol Chem* 3: 4077-4081, 2005.
146. **Staelens L, Oltenfreiter R, Dumont F, Waterhouse RN, Vandenbulcke K, Blanckaert P, Dierckx RA, and Slegers G.** In vivo evaluation of [123I]-4-iodo-N-(4-(4-(2-methoxyphenyl)-piperazin-1-yl)butyl)-benzamide: a potential sigma receptor ligand for SPECT studies. *Nuclear Medicine and Biology* 32: 193-200, 2005.
147. **Stephens JW, Price DE, Ionescu A, Linkova H, Ruzicka E, Penicka M, Kast RE, Altschuler EL, Ziegler JL, Bukhman GY, Sartiani L, Cerbai E, Mugelli A, Schade R, Andersohn F, Garbe E, Zanettini R, Pezzoli G, and Roth BL.** Dopamine Agonists and Valvular Heart Disease. *The New England Journal of Medicine* *N Engl J Med* 356: 1676-1680, 2007.
148. **Stewart DJ, Fahmy H, Roth BL, Yan F, and Zjawiony JK.** Bioisosteric modification of salvinorin A, a potent and selective kappa-opioid receptor agonist. *Arzneimittelforschung* 56: 269-275, 2006.
149. **Strachan RT, Ferrara G, and Roth BL.** Screening the receptorome: an efficient approach for drug discovery and target validation. *Drug Discov Today* 11: 708-716, 2006.
150. **Strouse TB, Kerrihard TN, Forscher CA, and Zakowski P.** Serotonin syndrome precipitated by linezolid in a medically ill patient on duloxetine. *J Clin Psychopharmacol* 26: 681-683, 2006.
151. **Svenningsson P, Bateup H, Qi H, Takamiya K, Haganir RL, Spedding M, Roth BL, McEwen BS, and Greengard P.** Involvement of AMPA receptor phosphorylation in antidepressant actions with special reference to tianeptine. *Eur J Neurosci* 26: 3509-3517, 2007.
152. **Svenningsson P, Nomikos GG, and Greengard P.** Response to Comment on "Diverse Psychotomimetics Act Through a Common Signaling Pathway". *Science* 305: 180d, 2004.
153. **Tallarida RJ.** Interactions between drugs and occupied receptors. *Pharmacology & Therapeutics* 113: 197-209, 2007.
154. **Urban JD, Clarke WP, von Zastrow M, Nichols DE, Kobilka B, Weinstein H, Javitch JA, Roth BL, Christopoulos A, Sexton PM, Miller KJ, Spedding M, and Mailman RB.** Functional selectivity and classical concepts of quantitative pharmacology. *J Pharmacol Exp Ther* 320: 1-13, 2007.
155. **Vercouillie J, Mavel S, Galineau L, Ragusa T, Innis R, Kassiou M, Chalon S, Dolle F, Besnard J-C, Guilloteau D, and Emond P.** Synthesis and in vitro evaluation of novel derivatives of diphenylsulfide as serotonin transporter ligands. *Bioorganic & Medicinal Chemistry Letters* 16: 1297-1300, 2006.
156. **Vortherms TA, Mosier PD, Westkaemper RB, and Roth BL.** Differential helical orientations among related G protein-coupled receptors provide a novel mechanism for

selectivity. Studies with salvinorin A and the kappa-opioid receptor. *J Biol Chem* 282: 3146-3156, 2007.

157. **Vortherms TA and Roth BL.** Receptorome screening for CNS drug discovery. *IDrugs* 8: 491-496, 2005.

158. **Vortherms TA and Roth BL.** Salvinorin A: from natural product to human therapeutics. *Mol Interv* 6: 257-265, 2006.

159. **Welch JT and Lim DS.** The synthesis and biological activity of pentafluorosulfanyl analogs of fluoxetine, fenfluramine, and norfenfluramine. *Bioorg Med Chem* 15: 6659-6666, 2007.

160. **Wesolowska A, Young S, and Dukat M.** MD-354 potentiates the antinociceptive effect of clonidine in the mouse tail-flick but not hot-plate assay. *European Journal of Pharmacology* 495: 129-136, 2004.

161. **Xia Z, Gray JA, Compton-Toth BA, and Roth BL.** A direct interaction of PSD-95 with 5-HT<sub>2A</sub> serotonin receptors regulates receptor trafficking and signal transduction. *J Biol Chem* 278: 21901-21908, 2003.

162. **Xia Z, Hufeisen SJ, Gray JA, and Roth BL.** The PDZ-binding domain is essential for the dendritic targeting of 5-HT<sub>2A</sub> serotonin receptors in cortical pyramidal neurons in vitro. *Neuroscience* 122: 907-920, 2003.

163. **Yan F, Mosier PD, Westkaemper RB, and Roth BL.** Galpha-Subunits Differentially Alter the Conformation and Agonist Affinity of kappa-Opioid Receptors. *Biochemistry* 47: 1567-1578, 2008.

164. **Yan F, Mosier PD, Westkaemper RB, Stewart J, Zjawiony JK, Vortherms TA, Sheffler DJ, and Roth BL.** Identification of the molecular mechanisms by which the diterpenoid salvinorin A binds to kappa-opioid receptors. *Biochemistry* 44: 8643-8651, 2005.

165. **Yan F and Roth BL.** Salvinorin A: a novel and highly selective kappa-opioid receptor agonist. *Life Sci* 75: 2615-2619, 2004.

166. **Young R.** TDIQ (5,6,7,8-tetrahydro-1,3-dioxolo [4,5-g]isoquinoline): Discovery, Pharmacological Effects, and Therapeutic Potential. *CNS Drug Reviews* 13: 405-422, 2007.

167. **Young R, Khorana N, Bondareva T, and Glennon RA.** Pizotyline effectively attenuates the stimulus effects of N-Methyl-3,4-methylenedioxymphetamine (MDMA). *Pharmacology Biochemistry and Behavior* 82: 404-410, 2005.

168. **Zhou J, Klass T, Johnson KM, Giberson KM, and Kozikowski AP.** Discovery of novel conformationally constrained tropane-based biaryl and arylacetylene ligands as potent and selective norepinephrine transporter inhibitors and potential antidepressants. *Bioorg Med Chem Lett* 15: 2461-2465, 2005.

169. **Zhu Z, Guo N, Narendran R, Erritzoe D, Ekelund J, Hwang D-R, Bae S-A, Laruelle M, and Huang Y.** The new PET imaging agent [<sup>11</sup>C]AFE is a selective serotonin transporter ligand with fast brain uptake kinetics. *Nuclear Medicine and Biology* 31: 983-994, 2004.
